# Supplementary material
Source: publisher figshare collection journal article supplement (https://acs.figshare.com/ndownloader/files/4574845)

# Synthetic studies on N-alkoxyamines: a mild and broadly applicable route starting from nitroxide radicals and aldehydes

*Kai-Uwe Schoening\*, Walter Fischer, Stefan Hauck, Alexander Dichtl, Michael Kuepfert*

Ciba Inc., WRO-1059, 4002 Basel, Switzerland

[kai-uwe.schoening@ciba.com](mailto:kai-uwe.schoening@ciba.com)

## Supporting information

### Content

|                                                                        |     |
|------------------------------------------------------------------------|-----|
| General                                                                | p2  |
| Experimental procedures for non-commercial aldehydes                   | p3  |
| Experimental procedures for compounds <b>S-1</b> – <b>S-27</b>         | p5  |
| Copies of $^1\text{H}$ , $^{13}\text{C}$ -NMR spectra of all compounds | p19 |

## General

NMR spectra were recorded at 300 or 400 MHz for  $^1\text{H}$ -NMR and 75.5 or 100 MHz for  $^{13}\text{C}$ -NMR. Chemical shifts were reported in the scale relative to the solvent used as an internal reference. MS measurements were collected on a ion trap mass spectrometer coupled with a gas chromatograph. The column was operated at a flow rate of 1 mL/min (Helium gas). The oven temperature was ramped between 60 and 360 °C at a rate of 30 °C/min. Alternatively, probes were directly inserted in the mass spectrometer source by a direct sample probe system in the direct exposure probe (DEP) mode. For structure confirmation, the system was operated in the PCI mode with isobutane as reagent gas. Masses were recorded as  $[\text{M}+\text{H}]^+$ . HRMS measurements were conducted on a LC-MS-MS system through flow injection. Molpeaks were determined in the positive mode. The mass calibration was conducted via external calibration.

In general, reactions were carried out in glassware under regular atmosphere. No precautions were taken to exclude moisture. Solvents and aldehydes were used as is without prior purification. Reagents and aldehydes were obtained from commercial sources unless otherwise noted.

*Attention: it is crucial to ensure that no residual peroxide is contained in the samples before starting distillations or complete drying!*

## Experimental procedures for non-commercial aldehydes

**Cyclobutyl carbaldehyde** was prepared according to: Omura, K.; Swern, D. *Tetrahedron* **1978**, *34*, 1651.

5.48 ml (63.86 mmol) oxalyl chloride were dissolved in 40 ml dichloromethane and cooled in a dry ice bath to  $-75\text{ }^{\circ}\text{C}$  under protective gas atmosphere. Then 9.07 ml (127.71 mmol) DMSO were added drop wise. A solution of 5.0 g (58.05 mmol) cyclobutane methanol in 40 ml methylene chloride was added and the mixture was stirred at  $-75\text{ }^{\circ}\text{C}$  for 1 h. After the addition of 40.40 ml (290.26 mmol) triethylamine and warming to rt, the mixture was washed with brine and water. The organic layer was separated, dried with  $\text{Na}_2\text{SO}_4$ , filtered and the solvent removed in vacuo. 1.06 g (12.6 mmol, 22%) cyclobutane carbaldehyde were obtained as a foul smelling, light yellow oil.  $^1\text{H-NMR}$  (400 MHz,  $\text{CDCl}_3$ ):  $\delta$  9.74 (s, 1H), 2.82 (m, 1H), 2.22 (m, 2H), 2.06 (m, 2H), 1.91 (m, 2H); MS:  $m/z = 85$   $[\text{M}+\text{H}]^+$ .

**Cyclooctane carbaldehyde** was prepared according to: Omura, K.; Swern, D. *Tetrahedron* **1978**, *34*, 1651.

3.32 ml (38.67 mmol) oxalyl chloride were dissolved in 40 ml dichloromethane and cooled in a dry ice bath to  $-75\text{ }^{\circ}\text{C}$  under protective gas atmosphere. Then 5.50 ml (77.33 mmol) DMSO were added drop wise. A solution of 5.0 g (35.15 mmol) cyclobutane methanol in 40 ml methylene chloride was added and the mixture was stirred at  $-75\text{ }^{\circ}\text{C}$  for 1 h. After the addition of 24.50 ml (175.76 mmol) triethylamine and warming to rt, the mixture was washed with brine and water. The organic layer was separated, dried with  $\text{Na}_2\text{SO}_4$ , filtered and the solvent removed *in vacuo*. 4.23 g (30.16 mmol, 86%) cyclooctane carbaldehyde were obtained as a light yellow oil.

$^1\text{H-NMR}$  (400 MHz,  $\text{CDCl}_3$ ):  $\delta$  9.60 (s, 1H), 2.36 (m, 1H), 1.92 (m, 2H), 1.69 (m, 2H), 1.45-1.62 (m, 10H); MS:  $m/z = 141$   $[\text{M}+\text{H}]^+$ .

**2-Methyl-2-nitro-5-oxopentanoic acid ethyl ester** was prepared according to: (a) Ballini, R.; Petrini, M. *Synthesis* **1986**, 1024-1026. (b) Hauck, S. PhD thesis, TU Kaiserslautern, **2007**, 173.

16.47 g (111.94 mmol) 2-nitro-propionic acid ethyl ester were dissolved in 100 ml acetonitrile under protective gas atmosphere and cooled to 0 °C. 2 ml Triethylamine and 11.0 ml (167.91 mmol) acroleine were added. The solution was stirred at 10 °C for 6.5 h. Then the mixture was treated with water, neutralized with aqueous HCl and extracted with methylene chloride. The organic layer was separated, dried over  $\text{Na}_2\text{SO}_4$ , filtered and the solvent was removed *in vacuo*. 18.34 g (90.26 mmol, 81 %) 2-methyl-2-nitro-5-oxopentanoic acid ethyl ester were obtained as yellow oil.  $^1\text{H-NMR}$  (400 MHz,  $\text{CDCl}_3$ ):  $\delta$  9.75 (s, 1H), 4.25 (q,  $J = 6.99$  Hz, 3H), 2.58 (m, 2H), 2.49 (m, 2H), 1.77 (s, 3H), 1.28 (t,  $J = 6.99$  Hz, 3H);  $^{13}\text{C-NMR}$  (100 MHz,  $\text{CDCl}_3$ ):  $\delta$  199.5, 167.3, 91.9, 63.4, 38.8, 29.1, 22.2, 14.2; MS:  $m/z = 204$   $[\text{M}+\text{H}]^+$ .

## Experimental procedures for compounds S-1 – S-27

General procedure for the synthesis of N-alkoxyamines: 4-hydroxy TEMPO and the required aldehyde (1.3-3 eq.) were dissolved in an appropriate solvent and 1-3.0 mol% of CuCl were added. At rt, 1.3-1.5 eq. of hydrogen peroxide (30% aqueous solution) were added over a period of 30-120 min. The reaction mixture was stirred at a temperature usually not higher than 40°C until all nitroxide radical was consumed. If required, more H<sub>2</sub>O<sub>2</sub> or aldehyde were added. Residual H<sub>2</sub>O<sub>2</sub> was thoroughly removed during the work-up process, (if necessary, NaHSO<sub>3</sub> solution can be used) and the crude products were purified by (flash) column chromatography or crystallization.

## Synthesis of compounds S-1 to S-27

**1-Methoxy-2,2,6,6-tetramethylpiperidin-4-ol (S-1).** To a solution of 5.0 g (29.0 mmol) 4-hydroxy-TEMPO in 20 ml water was added CuCl (57 mg, 2 mol %) and acetaldehyde (6.6 ml, 116 mmol). 8.9 ml (87 mmol) 30 % H<sub>2</sub>O<sub>2</sub> was added over a period of 30 min while keeping the temperature at 65 - 70 °C. After 4 h stirring at this temperature, the mixture is slowly cooled down to rt while the product started to precipitate. The pH of the reaction mixture was adjusted to ~8 using 10 % K<sub>2</sub>CO<sub>3</sub> solution and the mixture was cooled down to 5 °C. The product was collected by filtration. The filter cake was washed successively with cold 10 % ascorbic acid solution and water. The filtrate was extracted with toluene, and the organic phase was washed with brine. Upon drying over Na<sub>2</sub>SO<sub>4</sub>, the organic phase was removed *in vacuo* to yield a tan residue. The combined crude product fractions were purified by distillation (0.04 mbar, 120 °C oilbath temp, bp ~ 90 °C) to give **S-1** as a white solid (3.9 g, 20.8 mmol, 72%). <sup>1</sup>H-NMR (400 MHz, CDCl<sub>3</sub>): δ 3.94 (m, 1H), 3.61 (s, 3H), 1.79 (dd, *J* = 12.0, 4.0 Hz, 2H), 1.64 (br s, 1H), 1.46 (ps t, *J* = 12.0 Hz, 2H), 1.21 (2s, 6H), 1.26 (2s, 6H); <sup>13</sup>C-NMR (100 MHz, CDCl<sub>3</sub>): δ 65.4 (t), 63.2 (2q), 60.0 (p), 48.2 (2s), 33.1 (2p), 20.9 (2p); IR (neat): ν max 3265, 2960, 1450, 1358,

1173, 1026  $\text{cm}^{-1}$ ; MS:  $m/z = 188$   $[\text{M}+\text{H}]^+$ ; Anal. calcd. for  $\text{C}_{10}\text{H}_{21}\text{NO}_2$ : C, 64.13; H, 11.30; N, 7.48. Found: C, 63.94; H, 11.22; N, 7.45.

**1-Propoxy-2,2,6,6-tetramethylpiperidin-4-ol (S-2).** To a mixture of 150.0 g (870.8 mmol) 4-hydroxy-TEMPO in 620 ml 1-butanol/water (1:4) was added CuCl (861 mg, 1 mol%) and butanal (94.2 g, 1.31 mol). 120 ml (1.18 mol) 30%  $\text{H}_2\text{O}_2$  was added over a period of 30 min while keeping the temperature between 30 and 35  $^\circ\text{C}$ . Stirring was continued at 35  $^\circ\text{C}$  for 8 h, whereupon another 12 ml (118.0 mmol)  $\text{H}_2\text{O}_2$  was added. After 6 h the reaction mixture was extracted with MTBE. The combined organic phases were washed with 2 N NaOH, water, 5 %  $\text{Na}_2\text{EDTA}$ , 10 % ascorbic acid solution, and brine. After drying over  $\text{Na}_2\text{SO}_4$ , the organic phase was concentrated *in vacuo* to provide an off-white solid. Pure **S-2** was obtained after column chromatography (silica gel, hexane/acetone 9:1); (157.5 g, 731.5 mmol, 84 %).  $^1\text{H}$ -NMR (400 MHz,  $\text{CDCl}_3$ ):  $\delta$  3.95 (m, 1H), 3.70 (q,  $J = 9.2$  Hz, 2H), 1.80 (dd,  $J = 14.4, 3.2$  Hz, 2H), 1.70 (br s, 1H, OH), 1.53 (m, 2H), 1.50 (m, 4H), 1.24 (2s, 6H), 1.15 (2s, 6H), 0.95 (t,  $J = 10.4$  Hz, 3H);  $^{13}\text{C}$ -NMR (100 MHz,  $\text{CDCl}_3$ ):  $\delta$  78.4 (s), 63.3 (t), 60.0 (2q), 48.3 (2s), 33.2 (2p), 21.9 (s), 21.0 (2p), 10.9 (p); IR (neat):  $\nu$  max 3264, 2965, 1451, 1363, 1173, 1040  $\text{cm}^{-1}$ ; MS:  $m/z = 216$   $[\text{M}+\text{H}]^+$ ; Anal. calcd. for  $\text{C}_{12}\text{H}_{25}\text{NO}_2$ : C, 66.93; H, 11.70; N, 6.50. Found: C, 66.73; H, 11.49; N, 6.38.

**1-Isopropoxy-2,2,6,6-tetramethylpiperidin-4-ol (S-3).** To a solution of 2.5 g (14.5 mmol) 4-hydroxy-TEMPO in 10 ml 2-propanol/water (1:5) was added CuCl (28.7 mg, 2 mol%) and 2-methylpropanal (1.57 g, 21.8 mmol). 2.5 g (21.8 mmol) 30 %  $\text{H}_2\text{O}_2$  was added over a period of 30 min while keeping the temperature under 30  $^\circ\text{C}$ . After 12 h of stirring at rt, the mixture was extracted with MTBE. The combined organic layers were washed with 10 % ascorbic acid solution, 1 N NaOH, water, and brine. After drying over  $\text{MgSO}_4$  the organic phase was concentrated *in vacuo* to leave a green solid. The crude product was recrystallized from water/ethanol (1:1) to yield **S-3** as white crystals (2.9 g, 13.3 mmol, 91%).  $^1\text{H}$ -NMR (400 MHz,  $\text{CDCl}_3$ ):  $\delta$  3.99 (m, 2H), 1.82 (dd,  $J = 12.0, 3.6$  Hz, 2H), 1.48 (ps t,  $J = 12.0$  Hz, 2H), 1.40 (br s, 1H, OH), 1.18 (m, 18H);  $^{13}\text{C}$ -NMR (100 MHz,  $\text{CDCl}_3$ ):  $\delta$  75.2 (t), 63.5 (t), 59.9 (2q), 48.8 (2s), 34.5 (2p), 22.3 (2p), 21.2 (2p); IR (neat):  $\nu$  max 3264, 2973, 1448, 1372, 1151, 1082  $\text{cm}^{-1}$ ; MS:

$m/z = 216 [M+H]^+$ ; Anal. calcd. for  $C_{12}H_{25}NO_2$ : C, 66.93; H, 11.70; N, 6.50. Found: C, 66.68; H, 11.07; N, 6.34.

**1-(1-Ethyl-pentyloxy)-2,2,6,6-tetramethylpiperidin-4-ol (S-4).** To a solution of 60.0 g (348.3 mmol) 4-hydroxy-TEMPO in 92 g (717.5 mmol) 2-methylheptanal was added 0.86 g (2.5 mol%) CuCl. 30 %  $H_2O_2$  (60.0 g, 522.5 mmol) was added over a period of 4 h at rt. The reaction mixture was stirred at 30 °C for 12 h, while every 4 h a further 10 ml of  $H_2O_2$  were added. The mixture was diluted with MTBE and subsequently washed with 10 % ascorbic acid solution, NaOH, water, brine. After drying over  $MgSO_4$  the organic phase was concentrated *in vacuo* to afford 102 g of a yellow oil. The crude product was heated *in vacuo* (0.05 mbar) at 70 °C for 8 h to remove residual aldehyde. The resulting product was filtered over silica gel (500 g, hexane/acetone 10:1) to yield 71.1 g (261.9 mmol, 75%) of **S-4** as a pale yellow oil after removal of the solvent.  $^1H$ -NMR (400 MHz,  $CDCl_3$ ):  $\delta$  4.00 (m, 1H), 3.70 (m, 1H), 1.80 (m, 2H), 1.69 (m, 1H), 1.48 (m, 3H), 1.32 (m, 4H), 1.18 (2s, 6H), 1.17 (2s, 6H), 0.98 (m, 6H);  $^{13}C$ -NMR (100 MHz,  $CDCl_3$ ):  $\delta$  83.2, 63.5, 60.3, 60.1, 48.9, 34.4, 32.0, 28.0, 25.3, 23.1, 21.4, 14.2, 11.8, 9.9; IR (neat):  $\nu$  max 3349, 2931, 1468, 1395, 1189, 1048  $cm^{-1}$ ; MS:  $m/z = 272 [M+H]^+$ ; Anal. calcd. for  $C_{16}H_{33}NO_2$ : C, 70.80; H, 12.25; N, 5.16. Found: C, 70.76; H, 12.17; N, 5.14.

**1-tert-Butyloxy-2,2,6,6-tetramethylpiperidin-4-ol (S-5).** To a solution of 25.0 g (145.1 mmol) 4-hydroxy-TEMPO in 100 ml ethanol/water (1:1), 24.8 g 30 %  $H_2O_2$  and CuCl (390 mg, 2 mol%) was added 15.6 g (181.4 mmol) pivaloylaldehyde (15.6 g, 181.4 mmol) over a period of 20 min while cooling applying a water bath. The emulsion was stirred at rt. After approximately 1 h, a white precipitate started forming. After 8 h, another 5.6 g (49.2 mmol)  $H_2O_2$  and 50 ml ethanol/water (1:1) were added and stirring was continued for 8 h. The reaction mixture was cooled to 5 °C, whereupon the solid was separated by filtration. The filter cake was thoroughly washed with water and subsequently dried at 45 °C (125 mbar) to give **S-5** (28.3 g, 123.3 mmol, 85%) as white crystals.  $^1H$ -NMR (400 MHz,  $CDCl_3$ ):  $\delta$  3.93 (m, 1H), 1.89 (br s, 1H), 1.81 (dd,  $J = 12.4, 1.6$  Hz, 2H), 1.45 (ps t,  $J = 12.0$  Hz, 2H), 1.28 (s, 9H), 1.64 (2s, 6H), 1.29 (2s, 6H);  $^{13}C$ -NMR (100 MHz,  $CDCl_3$ ):  $\delta$  78.0 (q), 63.1 (t), 59.6 (2q), 49.2 (2s), 34.8 (2p), 29.5 (3p), 21.4 (2p); IR (neat):  $\nu$  max 3268, 2975, 1472, 1449, 1371, 1168, 1044  $cm^{-1}$ ; MS:  $m/z = 230 [M+H]^+$ ; Anal. calcd. for  $C_{13}H_{27}NO_2$ : C, 68.08; H, 11.87; N, 6.11. Found: C, 67.83; H, 11.69; N, 6.03.

**1-Octyloxy-2,2,6,6-tetramethylpiperidin-4-ol (S-6).** To a solution of 10.0 g (58.1 mmol) 4-hydroxy-TEMPO in 30 ml *tert*-butanol/water (2:1) was added CuCl (140 mg, 2.5 mol%) and nonanal (28.9, 203.2 mmol). 10.2 g (151.0 mmol) 50 % H<sub>2</sub>O<sub>2</sub> was added under thorough stirring over a period of 75 min while keeping the temperature at 30 °C. After 12 h another 2 g of 50 % H<sub>2</sub>O<sub>2</sub> was added and stirring was continued for 4 h at 40 °C. The mixture was extracted with hexane and successively washed with 10 % ascorbic acid solution, 10 % NaHSO<sub>3</sub> solution, 1 N NaOH, water, and brine. After drying over MgSO<sub>4</sub> the organic phase was concentrated *in vacuo* to provide a yellow oil. The crude product was purified by flash column chromatography (100 g silica gel, hexane/acetone 8:1) to give **S-6** (11.8 g, 41.3 mmol, 71 %) as a colorless oil. <sup>1</sup>H-NMR (400 MHz, CDCl<sub>3</sub>): δ 3.96 (m, 1H), 3.72 (t, *J* = 6.6 Hz, 2H), 1.81 (dd, *J* = 12.4, 4.0 Hz, 2H), 1.60-1.39 (m, 4H), 1.39-1.20 (m, 22H), 0.88 (t, *J* = 10.8 Hz, 3H); <sup>13</sup>C-NMR (100 MHz, CDCl<sub>3</sub>): δ 77.2 (s), 63.4 (t), 60.0 (2q), 48.3 (2s), 33.2 (p), 31.9 (s), 29.7 (s), 29.3 (s), 28.7 (s), 26.4 (s), 22.7 (s), 21.1 (p), 14.2 (p); IR (neat): ν max 3346, 2925, 2855, 1692, 1467, 1399, 1194, 1046 cm<sup>-1</sup>; MS: *m/z* = 286 [M+H]<sup>+</sup>; Anal. calcd. for C<sub>17</sub>H<sub>35</sub>NO<sub>2</sub>: C, 71.53; H, 12.36; N, 4.91. Found: C, 71.38; H, 12.19; N, 4.85.

**Bis(1-octyloxy-2,2,6,6-tetramethyl-4-piperidyl) sebacate (S-7).** To a suspension of 100 g bis-(2,2,6,6-tetramethylpiperidin-1-oxyl-4-yl) sebacate (196 mmol) in a mixture consisting of 225 g heptane and 55 g *tert*-butanol was added 146.6 g (979 mmol) nonanal, 315 mg (1 mmol) hexadecyltrimethylammonium chloride, and 500 mg (5 mmol) CuCl. 75 g (1096 mmol) 50 % H<sub>2</sub>O<sub>2</sub> was added over a period of 2 h while keeping the internal temperature between 28 – 35 °C. The temperature was raised to 40 °C and stirring was continued for 12 h. After 6 h, another 16.5 g of H<sub>2</sub>O<sub>2</sub> was added. After 12 h, another 15 g of H<sub>2</sub>O<sub>2</sub> was added and stirring was continued at 55 °C for 2-3 h. The green emulsion obtained was diluted with hexane and washed successively with 10 % Na<sub>2</sub>CO<sub>3</sub> solution, 10 % Na<sub>2</sub>EDTA solution, sat. Na<sub>2</sub>CO<sub>3</sub>, water, and brine. The organic phase was dried over Na<sub>2</sub>SO<sub>4</sub> and subsequently removed *in vacuo*. The obtained yellow oil was stirred *in vacuo* (0.03 mbar) at 65 °C for 6 h. Chromatography over silica gel (1000g) with hexane/acetone 49:1 provided 109.4 g (148 mmol, 75%) of **S-7** as a pale yellow oil. <sup>1</sup>H-NMR (400 MHz, CDCl<sub>3</sub>): δ 5.00 (m, 2H), 3.72 (t, *J* = 6.4 Hz, 4H), 2.25 (t, *J* = 6.6 Hz, 4H), 1.80 (m, 4H), 1.60-1.47 (m, 12H), 1.39 -1.12 (m, 52H), 0.88 (t, *J* = 6.8 Hz, 6H). <sup>13</sup>C-NMR (100 MHz, CDCl<sub>3</sub>): δ 173.4 (q), 77.04 (s), 67.5 (t), 59.9 (q), 44.1 (s), 34.6 (s), 33.1 (p), 31.9 (s), 29.7 (s),

29.8 (s), 29.7 (s), 29.4 (s), 29.3 (s), 29.1 (s), 29.0 (s), 28.7 (s), 26.44 (s), 25.0 (s), 22.7 (s), 20.9 (p), 14.0 (p); IR (neat):  $\nu_{\text{max}}$  2927, 2855, 1733, 1457, 1360, 1173, 1001  $\text{cm}^{-1}$ ; MS:  $m/z$  = 737  $[\text{M}+\text{H}]^+$ ; Anal. calcd. for  $\text{C}_{44}\text{H}_{84}\text{N}_2\text{O}_6$ : C, 71.69; H, 11.49; N, 3.80. Found: C, 71.39; H, 11.58; N, 3.60.

**1-Cyclobutoxy-2,2,6,6-tetramethylpiperidin-4-ol (S-8).** To a solution of 0.79 g (4.57 mmol) 4-hydroxy-TEMPO in 4 ml *tert*-butanol/water (1:1) was added CuCl (16 mg, 3.5 mol%) and cyclobutane carbaldehyde (0.50 g, 5.95 mmol). 0.59 g (8.7 mmol) 50 %  $\text{H}_2\text{O}_2$  was added over a period of 30 min while keeping the temperature under 30 °C. After 18 h of stirring at rt, the mixture was stirred at 40 °C for 4 h. The product was extracted with MTBE. The combined organic layers were washed with 10 % ascorbic acid solution, 1 N NaOH, water, and brine. After drying over  $\text{Na}_2\text{SO}_4$ , the organic phase was concentrated *in vacuo* to leave a bright green oil which was purified by column chromatography (80 g silica gel, hexane/ethyl acetate 1:1) to give **S-8** (0.24 g, 1.1 mmol, 24%) as a colorless oil which solidified upon standing into a white wax.  $^1\text{H}$ -NMR (400 MHz,  $\text{CDCl}_3$ ):  $\delta$  4.13 (m, 1H), 3.93 (m, 1H), 2.28 (m, 2H), 1.92 (m, 2H), 1.81 (m, 2H), 1.54-1.35 (m, 4H), 1.21 (m, 1H), 1.11 (2s, 6H), 1.07 (2s, 6H);  $^{13}\text{C}$ -NMR (100 MHz,  $\text{CDCl}_3$ ):  $\delta$  81.2 (t), 63.4 (t), 58.9 (2q), 48.2 (2s), 33.4 (2p), 32.4 (2s), 21.0 (2p), 11.1 (s). IR (neat):  $\nu_{\text{max}}$  3227, 3004, 2973, 2928, 1469, 1371, 1360, 1342, 1246, 1236, 1087, 1048  $\text{cm}^{-1}$ ; HRMS (+ESI) calcd.  $[\text{C}_{13}\text{H}_{25}\text{NO}_2]^+ [\text{M}+\text{H}]^+$  MS: 228.1964 found 228.1966.

**1-Cyclohexyloxy-2,2,6,6-tetramethylpiperidin-4-ol (S-9).** To a solution of 6.8 g (39.5 mmol) 4-hydroxy-TEMPO in 25 ml *tert*-butanol/water (2:1) was added copper(II) chloride (39 mg, 1 mol%) and cyclohexane carbaldehyde (4.42 g, 39.5 mmol). 8.9 g (78.9 mmol) 30 %  $\text{H}_2\text{O}_2$  was added over a period of 30 min while keeping the temperature under 30 °C. After 12 h of stirring at rt, the mixture was extracted with MTBE. The combined organic layers were washed with 10 % ascorbic acid solution, 1 N NaOH, water, and brine. After drying over  $\text{MgSO}_4$ , the organic phase was concentrated *in vacuo* to leave a bright green oil (6.9 g, 90 % purity (GC)). The crude product was purified by column chromatography (80 g silica gel, hexane/acetone 9:1) to give **S-9** (6.3 g, 24.5 mmol, 62%) as a light chartreuse oil.  $^1\text{H}$ -NMR (400 MHz,  $\text{CDCl}_3$ ):  $\delta$  3.98 (m, 1H), 3.63 (m, 1H), 2.06 (m, 2H), 1.81 (m, 4H), 1.57-1.48 (m, 3H), 1.37-1.13 (m, 6H), 1.21 (2s, 6H),

1.17 (2s, 6H);  $^{13}\text{C}$ -NMR (100 MHz,  $\text{CDCl}_3$ ):  $\delta$  81.9 (t), 63.4 (t), 60.0 (2q), 48.8 (2s), 34.5 (2p), 32.8 (2s), 25.9 (2s), 25.0 (2s), 21.2 (2p); IR (neat):  $\nu$  max 3301, 2935, 2855, 1446, 1359, 1178, 1041  $\text{cm}^{-1}$ ; MS:  $m/z$  = 256  $[\text{M}+\text{H}]^+$ ; Anal. calcd. for  $\text{C}_{15}\text{H}_{29}\text{NO}_2$ : C, 70.54; H, 11.45; N, 5.48. Found: C, 70.18; H, 11.37; N, 5.35.

**1-Cyclooctyloxy-2,2,6,6-tetramethylpiperidin-4-ol (S-10).** To a solution of 1.00 g (5.8 mmol) 4-hydroxy-TEMPO in 4 ml *tert*-butanol/water (1:1) was added CuCl (16 mg, 3.5 mol%) and cyclooctyl carbaldehyde (1.06 g, 7.5 mmol). 0.59 g (8.7 mmol) 50 %  $\text{H}_2\text{O}_2$  was added over a period of 30 min while keeping the temperature under 30 °C. After 18 h of stirring at rt, the mixture was heated to 40 °C for 24 h. The mixture was then extracted with MTBE. The combined organic layers were washed with 10 % ascorbic acid solution, 1 N NaOH, water, and brine. After drying over  $\text{Na}_2\text{SO}_4$ , the organic phase was concentrated *in vacuo* to leave a yellow oil. This was purified by column chromatography (80 g silica gel, hexane/ethyl acetate 2:1) to give **S-10** (0.73 g, 2.6 mmol, 45 %) as a pale yellow oil. After a short time, the oil solidified into a yellowish wax.  $^1\text{H}$ -NMR (300 MHz,  $\text{CDCl}_3$ ):  $\delta$  3.96 (ddd,  $J$  = 16.2, 6.7, 4.9 Hz, 1H), 3.86 (ddd,  $J$  = 12.0, 8.4, 3.7 Hz, 1H), 2.00 (ddt,  $J$  = 11.6, 11.6, 7.8, 3.6 Hz, 2H), 1.81 (m, 2H), 1.44-1.74 (multiple m, 15H), 1.19 (s, 6H), 1.16 (s, 6H).  $^{13}\text{C}$ -NMR (75 MHz,  $\text{CDCl}_3$ ):  $\delta$  83.4, 63.5, 60.1, 48.9, 34.5, 31.1, 27.5, 25.7, 23.6, 21.4; IR (neat):  $\nu$  max 3264, 3006, 2969, 2917, 2850, 1446, 1467, 1358, 1337, 1372, 1244, 1162, 1213, 1193, 1177, 1031, 1042  $\text{cm}^{-1}$ ; HRMS (+ESI) calcd.  $[\text{C}_{17}\text{H}_{33}\text{NO}_2]^+ [\text{M}+\text{H}]^+$  MS: 284.2590 found 284.2587.

**1-(Cyclohex-3-enyloxy)-2,2,6,6-tetramethylpiperidin-4-ol (S-11).** To a solution of 7.5 g (43.5 mmol) 4-hydroxy-TEMPO in 25 ml *tert*-butanol/water (2:1) was added CuCl (43 mg, 1 mol%) and 3-cyclohexene-1-carboxaldehyde (7.19 g, 65.3 mmol). 7.1 g (69.7 mmol) 30 %  $\text{H}_2\text{O}_2$  was added over a period of 30 min while keeping the temperature under 30 °C. After 12 h of stirring at 30 °C, the mixture was extracted with MTBE. The combined organic layers were washed with 10 % ascorbic acid solution, 1 N NaOH, water, and brine. After drying over  $\text{MgSO}_4$ , the organic phase was concentrated *in vacuo* to leave a bright green oil (6.9 g, 90 purity (GC)). The crude product was purified by flash column chromatography (100 g silica gel, hexane/acetone 12:1) to give **S-11** (7.9 g, 31.3 mmol, 72%) as a white solid.  $^1\text{H}$ -NMR (400 MHz,  $\text{CDCl}_3$ ):  $\delta$  5.59 (m, 2H),

3.94 (m, 2H), 2.39 (m, 1H), 2.25-2.02 (m, 4H), 1.83 (m, 3H), 1.51 (m, 3H), 1.21 (2s, 6H), 1.17 (2s, 6H);  $^{13}\text{C}$ -NMR (100 MHz,  $\text{CDCl}_3$ ):  $\delta$  126.7 (t), 125.0 (t), 78.7 (t), 63.1 (t), 60.1 (q), 60.4 (q), 48.7 (2s), 34.5 (2p), 31.8 (s), 28.7 (s), 25.0 (s), 21.2 (2p); IR (neat):  $\nu$  max 3372, 3009, 2930, 1447, 1359, 1174, 1026  $\text{cm}^{-1}$ ; MS:  $m/z$  = 254  $[\text{M}+\text{H}]^+$ ; Anal. calcd. for  $\text{C}_{15}\text{H}_{27}\text{NO}_2$ : C, 71.10; H, 10.74; N, 5.53. Found: C, 71.33; H, 10.49; N, 5.38.

**1-(Bicyclo[2.2.1]hept-5-en-2-yloxy)-2,2,6,6-tetramethylpiperidin-4-ol (S-12).** To a solution of 1.00 g (5.8 mmol) 4-hydroxy-TEMPO in 4 ml ethanol was added CuCl (14 mg, 2.5 mol%) and bicyclo[2.2.1]hept-5-ene-2-carboxaldehyde (1.1 g, 8.71 mmol). 1.0 g (8.7 mmol) 30 %  $\text{H}_2\text{O}_2$  was added over a period of 2 h and the reaction mixture was stirred at rt for 48 h. The product was extracted with ethyl acetate. The combined organic layers were washed with 10 % ascorbic acid solution, 1 N NaOH, water, and brine. After drying over  $\text{Na}_2\text{SO}_4$ , the organic phase was concentrated *in vacuo* to leave a yellow oil. The crude product was purified by flash column chromatography (15 g silica gel, hexane/acetone 19:1) to give **S-12** (1.14 g, 4.3 mmol, 74%) as a white solid consisting of two isomers in a 9:1 ratio (exo/endo). Sublimation of this material (0.01 mbar, 80 °C) did not lead to an increase in purity.  $^1\text{H}$ -NMR (400 MHz,  $\text{CDCl}_3$ ) (major isomer):  $\delta$  6.15 (dd,  $J$  = 5.4, 2.7 Hz, 1H), 5.91 (dd,  $J$  = 5.4, 3.3 Hz, 1H), 3.93 (m, 2H), 3.09 (s, 1H), 2.74 (s, 1H), 2.00-1.05 (m, ~30H);  $^{13}\text{C}$ -NMR (100 MHz,  $\text{CDCl}_3$ ):  $\delta$  140.7, 138.1, 133.8, 131.8, 91.0, 87.9, 87.0, 63.1, 30.4, 60.0, 59.4, 59.3, 48.4, 47.5, 47.2, 46.6, 46.0, 41.2, 39.8, 36.6, 35.7, 34.7, 34.3, 33.9, 33.8, 30.6, 30.2, 21.2, 14.4, 13.1, 11.3; IR (neat):  $\nu$  max 3378, 2969, 2936, 1478, 1452, 1372, 1340, 1245, 1165, 1031  $\text{cm}^{-1}$ ; MS:  $m/z$  = 266  $[\text{M}+\text{H}]^+$ . Anal. calcd. for  $\text{C}_{16}\text{H}_{27}\text{NO}_2$ : C, 70.80; H, 9.90; N, 5.00. Found: C, 71.50; H, 10.13; N, 4.99.

**1-(1,1-Dimethyl-but-3-enyloxy)-2,2,6,6-tetramethylpiperidin-4-ol (S-13).** To a solution of 1.00 g (5.8 mmol) 4-hydroxy-TEMPO in 4 ml *tert*-butanol/water (1:1) was added CuCl (16 mg, 3.5 mol%) and 2,2-dimethyl-4-pentenal (1.02 ml, 7.5 mmol). 0.590 g (8.7 mmol) 50 %  $\text{H}_2\text{O}_2$  was added over a period of 30 min while keeping the temperature below 30 °C. After 28 h of stirring at rt, the mixture was extracted with MTBE. The combined organic layers were washed with 10 % ascorbic acid solution, 1 N NaOH, water, and brine. After drying over  $\text{Na}_2\text{SO}_4$ , the organic phase was concentrated *in vacuo* to leave **S-13** as a light yellow oil which solidified into a

yellowish wax after a short time (1.25 g, 4.89 mmol, 84%).  $^1\text{H-NMR}$  (300 MHz,  $\text{CDCl}_3$ ):  $\delta$  5.86 (dddd,  $J = 14.5, 12.2, 9.0, 7.3$  Hz, 1H), 4.99 (m, 1H), 4.95 (tdd,  $J = 6.5, 2.4, 1.3, 1.3$  Hz, 1H), 3.87 (tt,  $J = 11.5, 11.5, 4.2, 4.2$  Hz, 1H), 2.30 (d,  $J = 7.2$  Hz, 2H), 1.75 (tdd,  $J = 12.9, 3.8, 2.1, 2.1$  Hz, 2H), 1.38 (ps t,  $J = 11.8$  Hz, 2H), 1.18 (s, 6H), 1.10 (s, 6H), 1.07 (s, 6H);  $^{13}\text{C-NMR}$  (100 MHz,  $\text{CDCl}_3$ ):  $\delta$  135.7, 116.8, 79.2, 63.1, 59.8, 49.2, 47.8, 26.7, 21.6; IR (neat):  $\nu$  max 3281, 3007, 2972, 2931, 1447, 1471, 1435, 1374, 1358, 1251, 1206, 1163, 1192, 1079, 1031  $\text{cm}^{-1}$ ; HRMS (+ESI) calcd.  $[\text{C}_{15}\text{H}_{29}\text{NO}_2]^+ [\text{M}+\text{H}]^+$  MS: 256.2277 found 256.2278.

**1-(((Z)-Non-3-enyl)oxy)-2,2,6,6-tetramethylpiperidin-4-ol (S-14).** To a solution of 1.00 g (5.8 mmol) 4-hydroxy-TEMPO in 4 ml toluene/*tert*-butanol (1:1) was added CuCl (16 mg, 3.5 mol%) and *cis*-4-decenal (4.11 ml, 22.5 mmol). 0.59 g (8.7 mmol) 50 %  $\text{H}_2\text{O}_2$  was added over a period of 30 min while keeping the temperature below 30 °C. After 18 h of stirring at rt, the mixture was heated to 40 °C for 20 h. The mixture was subsequently extracted with MTBE. The combined organic layers were washed with 10 % ascorbic acid solution, 1 N NaOH, water, and brine. After drying over  $\text{Na}_2\text{SO}_4$ , the organic phase was concentrated *in vacuo* to leave a yellow oil which was purified by column chromatography (120 g silica gel, hexane/ethyl acetate 1:1) to give **S-14** (0.99 g, 3.52 mmol, 61%) as a light yellow oil.  $^1\text{H-NMR}$  (400 MHz,  $\text{CDCl}_3$ ):  $\delta$  5.41 (m, 2H), 3.94 (m, 1H), 3.73 (t,  $J = 7.0$  Hz, 2H), 2.27 (m, 2H), 2.03 (m, 2H), 1.79 (dd,  $J = 11.5$  Hz, 3.2 Hz, 2 H), 1.45 (ps t,  $J = 11.9$  Hz, 2H), 1.26-1.40 (multiple m, 6H), 1.19 (s, 6H), 1.14 (s, 6H), 0.88 (t,  $J = 6.8$  Hz, 3H);  $^{13}\text{C-NMR}$  (100 MHz,  $\text{CDCl}_3$ ):  $\delta$  131.7, 125.8, 76.4, 63.4, 60.0, 48.3, 33.2, 31.5, 29.3, 27.2, 26.8, 22.6, 21.0, 14.1; IR (neat):  $\nu$  max. 3329, 3006, 2925, 2857, 1467, 1456, 1372, 1369, 1045, 1030  $\text{cm}^{-1}$ ; HRMS (+ESI) calcd.  $[\text{C}_{18}\text{H}_{35}\text{NO}_2]^+ [\text{M}+\text{H}]^+$  MS: 298.2741 found 298.2736.

**1-(1-Phenyl-ethoxy)-2,2,6,6-tetramethylpiperidin-4-ol (S-15).** To a solution of 1.0 g (5.8 mmol) 4-hydroxy-TEMPO in 4 ml *tert*-butanol was added CuCl (20 mg, 3.5 mol%) and 2-phenylpropionaldehyde (1.6 g, 11.6 mmol). 1.3 g (11.6 mmol) 30 %  $\text{H}_2\text{O}_2$  was added over a period of 30 min. After 12 h of stirring at rt, the mixture was extracted with MTBE. The combined organic layers were washed with 10 % ascorbic acid solution, 1 N NaOH, water, and brine. After drying over  $\text{MgSO}_4$ , the organic phase was concentrated *in vacuo* to give an off-

white solid. The crude product was dissolved in boiling hexane (10 ml), and upon cooling the product crystallized as a white solid. The crystals were separated by filtration to give pure **S-15** (1.15g, 4.15 mmol, 68%).  $^1\text{H-NMR}$  (400 MHz,  $\text{CDCl}_3$ ):  $\delta$  7.45-7.24 (m, 5H), 4.80 (q,  $J = 6.8$  Hz, 1H), 3.81 (m, 1H), 1.86 (dd,  $J = 8.8, 3.8$  Hz, 1H), 1.75 (m, 1H), 1.61-1.40 (m, 2H), 1.53 (s, 3H), 1.37 (s, 3H), 1.25 (s, 3H), 1.11 (s, 3H), 0.70 (s, 3H);  $^{13}\text{C-NMR}$  (100 MHz,  $\text{CDCl}_3$ ):  $\delta$  145.5 (q), 128.1 (2t), 127.0 (t), 126.7 (2t), 83.2 (t), 63.3 (t), 60.2 (q), 60.0 (q), 48.9 (s), 48.8 (s), 34.5 (p), 34.2 (p), 23.5 (p), 21.3 (p); IR (neat):  $\nu$  max 3274, 3004, 2924, 1449, 1374, 1212, 1043  $\text{cm}^{-1}$ ; MS:  $m/z = 278$   $[\text{M}+\text{H}]^+$ ; Anal. calcd. for  $\text{C}_{17}\text{H}_{27}\text{NO}_2$ : C, 73.61; H, 9.81; N, 5.05. Found: C, 73.25; H, 9.09; N, 4.95.

**2,2,6,6-Tetramethyl-1-(2-phenyl-propoxy)-piperidin-4-ol (S-16).** To a solution of 10.0 g (58.1 mmol) 4-hydroxy-TEMPO in 30 ml water was added acetic acid (300 mg), CuCl (20 mg, 3.5 mol%) and 3-phenylbutyraldehyde (11.18 g, 75.47 mmol). 5.9 g (87.0 mmol) 50 %  $\text{H}_2\text{O}_2$  was added over a period of 30 min. After 12 h of stirring at rt, the mixture was extracted with MTBE. The combined organic layers were washed with 10 % ascorbic acid solution, 1 N NaOH, water, and brine. After drying over  $\text{MgSO}_4$ , the organic phase was concentrated *in vacuo* to give an off-white solid. The crude product was dissolved in boiling hexane (10 ml), and upon cooling the product crystallized as a white solid. The crystals were separated by filtration to give pure **S-16** (1.15g, 4.15 mmol, 68%). Alternatively, the product can be purified by Kugelrohr® distillation ( $1.2 \times 10^{-1}$  mbar, 110-130  $^\circ\text{C}$ ).  $^1\text{H-NMR}$  (400 MHz,  $\text{CDCl}_3$ ):  $\delta$  7.27 (m, 5H), 3.94 (m, 1H), 3.84 (m, 2H), 3.01 (sext.,  $J = 6.90, 6.90, 6.89, 6.89, 6.89$  Hz, 1H), 1.78 (m, 2H), 1.44 (dt,  $J = 12.13, 12.10, 6.19$  Hz, 2H), 1.35 (d,  $J = 7.03$  Hz, 3H), 1.24 (m, 1H), 1.16 (s, 3H), 1.15 (s, 3H), 1.08 (s, 3H), 1.07 (s, 3H);  $^{13}\text{C-NMR}$  (100 MHz,  $\text{CDCl}_3$ ):  $\delta$  144.6, 128.1, 127.5, 126.2, 82.0, 63.3, 60.2, 48.3, 39.5, 33.1, 33.0, 21.1, 21.0, 18.2; IR (neat):  $\nu$  max 3263, 2966, 2923, 2871, 1495, 1452, 1371, 1360, 1049, 1033  $\text{cm}^{-1}$ ; MS:  $m/z = 292$   $[\text{M}+\text{H}]^+$ ; Anal. calcd. for  $\text{C}_{18}\text{H}_{29}\text{NO}_2$ : C, 74.18; H, 10.03; N, 4.81. Found: C, 74.01; H, 9.97; N, 4.83.

**2-(4-Hydroxy-2,2,6,6-tetramethylpiperidin-1-yloxy)-propionic acid ethyl ester (S-17).** To a solution of 0.50 g (2.9 mmol) 4-hydroxy-TEMPO in 4 ml *tert*-butanol/water (1:1) was added CuCl (8 mg, 3.5 mol%) and 2-formyl propionic acid ethyl ester (0.49 g, 3.75 mmol). 0.30 g (4.35 mmol) 50 %  $\text{H}_2\text{O}_2$  was added over a period of 30 min while keeping the temperature below 30

°C. After 26 h of stirring at 30 °C, the mixture was extracted with MTBE. The combined organic layers were washed with 10 % ascorbic acid solution, 1 N NaOH, water, and brine. After drying over Na<sub>2</sub>SO<sub>4</sub>, the organic phase was concentrated *in vacuo* to leave a yellow oil which was purified by column chromatography (80 g silica gel, hexane/ethyl acetate 2:1) to give **S-17** (0.50 g, 1.83 mmol, 63 %) as a light yellow oil. <sup>1</sup>H-NMR (400 MHz, CDCl<sub>3</sub>): δ 4.30 (q, *J* = 7.0 Hz, 1H), 4.16 (ddd, *J* = 14.2, 7.1, 1.5 Hz, 2H), 3.95 (m, 1H), 1.79 (m, 2H), 1.45 (m, 2H), 1.40 (d, *J* = 7.0 Hz, 3H), 1.28 (t, *J* = 7.1 Hz, 3H), 1.22 (s, 3H), 1.17 (2s, 6H), 1.07 (s, 3H); <sup>13</sup>C-NMR (100 MHz, CDCl<sub>3</sub>): δ 174.1, 81.8, 63.0, 60.5, 59.9, 48.7, 48.4, 33.7, 33.0, 21.1, 21.0, 18.3, 14.1. IR (neat): ν max 3451, 2977, 2936, 1733, 1457, 1362, 1374, 1263, 1184, 1126, 1078, 1047, 1030 cm<sup>-1</sup>; MS: *m/z* = 274 [M+H]<sup>+</sup>. Anal. calcd. for C<sub>14</sub>H<sub>27</sub>NO<sub>4</sub>: C, 61.51; H, 9.96; N, 5.12. Found: C, 61.79; H, 9.85; N, 5.01.

**4-(4-Hydroxy-2,2,6,6-tetramethylpiperidin-1-yloxy)-2-methyl-2-nitro-butyric acid ethyl ester (S-18).** To a solution of 1.0 g (5.8 mmol) 4-hydroxy-TEMPO in 4 ml *tert*-butanol/water (1:1) was added CuCl (5 mg, 5 mol%) and 2-methyl-2-nitro-5-oxopentanoic acid ethyl ester (1.54 g, 7.5 mmol). 0.590 g (8.7 mmol) 50 % H<sub>2</sub>O<sub>2</sub> was added over a period of 30 min while keeping the temperature below 30 °C. After 22 h of stirring at rt, the mixture was extracted with MTBE. The combined organic layers were washed with 10 % ascorbic acid solution, 1 N NaOH, water, and brine. After drying over Na<sub>2</sub>SO<sub>4</sub>, the organic phase was concentrated *in vacuo*. The crude product was purified by flash column chromatography (50 g silica gel, hexan/acetone 10:1) to afford **S-18** as a pale yellow oil (1.28 g, 3.7 mmol, 64%). <sup>1</sup>H-NMR (400 MHz, CDCl<sub>3</sub>): δ 4.27 (q, *J* = 7.1 Hz, 2H), 3.90 (m, 1H), 3.87 (m, 2H), 2.62 (m, 1H), 2.47 (m, 1H), 1.86 (s, 3H), 1.79 (dd, *J* = 12.3, 4.1 Hz, 2H), 1.43 (ps t, *J* = 12.5 Hz, 2H), 1.29 (t, *J* = 7.1 Hz, 3H), 1.10-1.28 (multiple s, 12H); <sup>13</sup>C-NMR (100 MHz, CDCl<sub>3</sub>): δ 167.3, 91.4, 71.6, 63.1, 62.9, 60.1, 48.1, 35.5, 33.1, 31.2, 21.1, 21.0, 13.8; IR (neat): ν max 3357, 2974, 2939, 1748, 1455, 1374, 1361, 1299, 1252, 1193, 1111, 1140, 1046, 1029 cm<sup>-1</sup>; HRMS (+ESI) calcd. [C<sub>16</sub>H<sub>30</sub>N<sub>2</sub>O<sub>6</sub>]<sup>+</sup> [M+H]<sup>+</sup> MS: 347.2182 found 347.2174.

**4-Hydroxy-2,2,6,6-tetramethylpiperidin-1-yl carbonic acid methyl ester (S-19).** To a solution of 2.5 g (14.5 mmol) 4-hydroxy-TEMPO in 8 g (90.8 mmol) methyl glyoxylate was added CuCl

(28.7 mg, 2 mol%). 2.0 g (19.6 mmol) 30 % H<sub>2</sub>O<sub>2</sub> was added over a period of 60 min. After 12 h of stirring at rt, the mixture was diluted with MTBE. The organic phase was washed with 10 % ascorbic acid solution, 1 N NaOH, water, and brine. After drying over MgSO<sub>4</sub>, the organic phase was concentrated *in vacuo* to leave a white solid. The crude product was filtered over silica gel (20 g) using hexane/acetone (2:1) to yield **S-19** as a white solid (2.55g, 11.0 mmol, 76%). <sup>1</sup>H-NMR (300 MHz, CDCl<sub>3</sub>): δ 4.01 (m, 1H), 3.82 (s, 3H), 1.89 (dd, *J* = 11.2, 4.2 Hz, 2H), 1.82 (br s, 1H), 1.67 (ps t, *J* = 11.2 Hz, 2H), 1.21 (2s, 6H), 1.15 (2s, 6H); <sup>13</sup>C-NMR (75 MHz, CDCl<sub>3</sub>): δ 157.6 (q), 63.1 (t), 61.1 (2q), 55.5 (p), 48.1 (2s), 32.0 (2p), 21.6 (2p); IR (neat): ν max 3234, 2966, 1773, 1440, 1365, 1225, 1183, 1047 cm<sup>-1</sup>; MS: *m/z* = 232 [M+H]<sup>+</sup>; Anal. calcd. for C<sub>11</sub>H<sub>21</sub>NO<sub>4</sub>: C, 57.12; H, 9.15; N, 6.06. Found: C, 57.34; H, 8.97; N, 5.83.

**1-(2,2-Dimethoxy-ethoxy)-2,2,6,6-tetramethylpiperidin-4-ol (S-20).** To a solution of 2.5 g (14.5 mmol) 4-hydroxy-TEMPO in 7.5 g (63.5 mmol) 3,3-dimethoxy propanal was added CuCl (28.7 mg, 2 mol%). 2.0 g (19.6 mmol) 30 % H<sub>2</sub>O<sub>2</sub> was added over a period of 60 min. After 9 h of stirring at rt, the mixture was diluted with MTBE. The organic phase was successively washed with water, 1 N NaOH, 10% Na<sub>2</sub>EDTA solution, water, and brine. After drying over MgSO<sub>4</sub>, the organic phase was concentrated *in vacuo* to leave a white solid. The crude product was recrystallized from hexane/acetone (95:5) to yield **S-20** as a white solid (2.5g, 9.58 mmol, 66%). <sup>1</sup>H-NMR (300 MHz, CDCl<sub>3</sub>): δ 4.49 (t, *J* = 5.2 Hz, 1H), 3.94 (m, 1H), 3.84 (2d, *J* = 5.2 Hz, 2H), 3.40 (2s, 6H), 2.72 (s, 1H), 1.81 (dd, *J* = 12.4, 4.0 Hz, 2H), 1.52 (br s, 1H), 1.48 (ps t, *J* = 11.6 Hz, 2H), 1.22 (2s, 6H), 1.16 (2s, 6H); <sup>13</sup>C-NMR (75 MHz, CDCl<sub>3</sub>): δ 102.4 (t), 77.3 (s), 63.2 (t), 60.2 (2q), 53.9 (2p), 48.3 (2s), 33.1 (2p), 21.0 (2p); IR (neat): ν max 3401, 2974, 1718, 1469, 1374, 1193, 1077 cm<sup>-1</sup>; MS: *m/z* = 262 [M+H]<sup>+</sup>; Anal. calcd. for C<sub>13</sub>H<sub>27</sub>NO<sub>4</sub>: C, 59.74; H, 10.41; N, 5.36. Found: C, 59.69; H, 10.32; N, 5.38.

**Acetic acid 4-hydroxy-2,2,6,6-tetramethylpiperidin-1-yloxymethyl ester (S-21).** To a solution of 1.0 g (5.8 mmol) 4-hydroxy-TEMPO in 5 ml toluene and 1.19 g (11.6 mmol) acetoxyacetaldehyd was added CuCl (11.4 mg, 2 mol%). 1.3 g (11.6 mmol) 30 % H<sub>2</sub>O<sub>2</sub> was added over a period of 120 min. After 12 h of stirring at rt, the mixture was diluted with toluene. The organic phase was washed with 5 % ascorbic acid solution, 0.1 M Na<sub>2</sub>CO<sub>3</sub> solution, water,

and brine. After drying over  $\text{MgSO}_4$ , the organic phase was concentrated *in vacuo* to leave a pale chartreuse oil. The crude product was heated to 35 °C for 4 h while applying a vacuum of 0.05 mbar to afford 0.97 g (4.0 mmol, 68 %) of pure **S-21** as an oil.  $^1\text{H}$ -NMR (400 MHz,  $\text{CDCl}_3$ ):  $\delta$  5.45 (s, 2H), 3.99 (m, 1H), 2.10 (s, 3H), 1.86 (dd,  $J = 12.8, 6.4$  Hz, 2H), 1.48 (ps t,  $J = 12.0$  Hz, 2H), 1.21 (2s, 6H), 1.17 (2s, 6H);  $^{13}\text{C}$ -NMR (100 MHz,  $\text{CDCl}_3$ ):  $\delta$  170.3 (q), 93.4 (s), 63.0 (t), 60.2 (2q), 48.1 (2s), 33.3 (2p), 21.1 (3p); IR (neat):  $\nu$  max 3378, 2975, 2938, 1735, 1458, 1364, 1220, 1008  $\text{cm}^{-1}$ ; HRMS (+ESI) calcd.  $[\text{C}_{12}\text{H}_{23}\text{NO}_4]^+ [\text{M}+\text{H}]^+$  MS: 246.1670 found 246.1666.

**4-(4-Hydroxy-2,2,6,6-tetramethylpiperidin-1-yloxymethyl)-piperidine-1-carboxylic acid tert-butyl ester (S-22).** To a solution of 0.29 g (1.7 mmol) 4-hydroxy-TEMPO in 4 ml *tert*-butanol/water (1:1) was added CuCl (5 mg, 5 mol%) and N-Boc-piperidiny-4-acetaldehyde (0.500 g, 2.2 mmol). 0.173 g (2.55 mmol) 50 %  $\text{H}_2\text{O}_2$  was added over a period of 30 min while keeping the temperature under 30 °C. After 21 h of stirring at rt, the mixture was extracted with MTBE. The combined organic layers were washed with 10 % ascorbic acid solution, 1 N NaOH, water, and brine. After drying over  $\text{Na}_2\text{SO}_4$ , the organic phase was concentrated *in vacuo* to leave **S-22** (0.252 g, 0.68 mmol, 40%) as a pale yellow oil.  $^1\text{H}$ -NMR (400 MHz,  $\text{CDCl}_3$ ):  $\delta$  4.07 (m, 2H), 3.92 (m, 1H), 3.59 (m, 2H), 2.68 (m, 2H), 1.76 (dd,  $J = 12.3, 4.0$  Hz, 2H), 1.69 (m, 2H), 1.40-1.48 (m, 5H), 1.43 (s, 9H), 1.15 (s, 6H), 1.11 (s, 6H);  $^{13}\text{C}$ -NMR (100 MHz,  $\text{CDCl}_3$ ):  $\delta$  154.8, 80.9, 79.3, 62.3, 60.2, 48.2, 36.1, 33.2, 29.2, 28.5, 21.1; IR (neat):  $\nu$  max 2974, 2927, 2868, 1669, 1468, 1364, 1423, 1273, 1243, 1168, 1145, 1045  $\text{cm}^{-1}$ ; HRMS (+ESI) calcd.  $[\text{C}_{20}\text{H}_{38}\text{N}_2\text{O}_4]^+ [\text{M}+\text{H}]^+$  MS: 371.2904 found 371.2900.

**4-Ethyl-4-(4-hydroxy-2,2,6,6-tetramethylpiperidin-1-yloxy)-hexanenitrile (S-23).** To a solution of 1.00 g (5.8 mmol) 4-hydroxy-TEMPO in 4 ml *tert*-butanol/water (1:1) was added CuCl (10 mg, 3.5 mol%) and 4-ethyl-4-formylhexanenitrile (1.21 ml, 7.5 mmol). 0.59 g (8.7 mmol) 50 %  $\text{H}_2\text{O}_2$  was added over a period of 30 min while keeping the temperature below 30 °C. After 5 h of stirring at rt, the mixture was heated to 40 °C and stirred for an additional 38 h. The mixture was then extracted with MTBE. The combined organic layers were washed with 10 % ascorbic acid solution, 1 N NaOH, water, and brine. After drying over  $\text{Na}_2\text{SO}_4$ , the organic phase was concentrated *in vacuo* to leave a yellow oil which rapidly solidified into a light yellow

wax. Recrystallization of the wax in ethyl acetate and hexane yielded pure **S-23** (1.05 g, 3.5 mmol, 61%) as yellowish crystals.  $^1\text{H-NMR}$  (300 MHz,  $\text{CDCl}_3$ ):  $\delta$  3.96 (tt,  $J = 11.5, 11.5, 4.3, 4.3$  Hz, 1H), 2.63-2.55 (m, 2H), 2.15-2.07 (m, 2H), 1.87 (dd,  $J = 4.2, 1.7$  Hz, 1H), 1.83 (dd,  $J = 4.1, 1.8$  Hz, 1H), 1.77 (dq,  $J = 7.6, 7.4, 7.4, 2.6$  Hz, 4H), 1.46 (ps t,  $J = 11.9$  Hz, 2H), 1.17 (s, 6H), 1.16 (s, 6H), 0.95 (t,  $J = 11.8, 6\text{H}$ );  $^{13}\text{C-NMR}$  (75 MHz,  $\text{CDCl}_3$ ):  $\delta$  120.6, 81.6, 62.9, 60.2, 49.4, 34.6, 30.6, 21.9, 12.7, 9.5. IR (neat):  $\nu$  max 3280, 2975, 2934, 2878, 2245, 1457, 1373, 1361, 1199, 1182, 1163, 1048, 1035  $\text{cm}^{-1}$ ; HRMS (+ESI) calcd.  $[\text{C}_{17}\text{H}_{32}\text{N}_2\text{O}_2]^+$   $[\text{M}+\text{H}]^+$  MS: 297.2542 found 297.2557.

**2,2,6,6-Tetramethyl-1-(2,2,2-trifluoro-ethoxy)-piperidin-4-ol (S-24).** To a solution of 0.50 g (2.9 mmol) 4-hydroxy-TEMPO in 4 ml *tert*-butanol/water (1:1) was added CuCl (10 mg, 3.5 mol%) and 3,3,3-trifluoropropanal (0.32 ml, 3.75 mmol). 0.30 g (4.35 mmol) 50 %  $\text{H}_2\text{O}_2$  was added over a period of 30 min while keeping the temperature below 30  $^\circ\text{C}$ . After 72 h of stirring at rt, the mixture was extracted with MTBE. The combined organic layers were washed with 10% ascorbic acid solution, 1 N NaOH, water, and brine. After drying over  $\text{Na}_2\text{SO}_4$ , the organic phase was concentrated *in vacuo* to leave a yellow oil which was purified by column chromatography (80 g silica gel, hexane/ethyl acetate 1:1) to give **S-24** (0.55 g, 2.15 mmol, 74%) as a colourless oil, which quickly solidified into a white wax.  $^1\text{H-NMR}$  (400 MHz,  $\text{CDCl}_3$ ):  $\delta$  4.15 (dd,  $^2J_{\text{H,H}} = 8.7$  Hz,  $^3J_{\text{H,F}} = 17.5$  Hz, 2H), 3.97 (m, 1H), 1.82 (ddd,  $J = 5.4, 4.2, 1.8$  Hz, 2H), 1.46 (ps t,  $J = 12.0$  Hz, 2H), 1.22 (s, 6H), 1.19 (s, 6H);  $^{13}\text{C-NMR}$  (100 MHz,  $\text{CDCl}_3$ ):  $\delta$  123.1 (d,  $^1J_{\text{C,F}} = 278.7$  Hz), 73.8 (q,  $^2J_{\text{C,F}} = 31.7$  Hz), 62.8, 60.7, 48.1, 32.7, 20.8;  $^{19}\text{F-NMR}$  (282 MHz,  $\text{CDCl}_3$ , d  $\text{CF}_3\text{COOH} = -76.0$  ppm): d -73.12; IR (neat):  $\nu$  max 3231, 2976, 3005, 2932, 1364, 1264, 1165, 1090, 1040, 1050  $\text{cm}^{-1}$ ; HRMS (+ESI) calcd.  $[\text{C}_{11}\text{H}_{20}\text{F}_3\text{NO}_2]^+$   $[\text{M}+\text{H}]^+$  MS: 256.1524 found 256.1533.

**1-(2-Hydroxy-2-methyl-propoxy)-2,2,6,6-tetramethylpiperidin-4-ol (S-25).** To a solution of 215.9 mg (1.25 mmol) 4-hydroxy-TEMPO and 160 mg (1.57 mmol) 3-hydroxy-3-methylbutanal in 1 ml *tert*-butanol/water (1:1) was added CuCl (5 mg, 3.5 mol%). 178 mg (1.57 mmol) 30 %  $\text{H}_2\text{O}_2$  was added and the reaction mixture was stirred at rt over night. The green solution was diluted with MTBE and the organic phase was washed with 10 % ascorbic acid solution, 1 N

NaOH, water, and brine. After drying over  $\text{MgSO}_4$ , the organic phase was concentrated *in vacuo* to provide a pale yellow oil which solidified upon standing at rt. The crude product was recrystallized from hexane/ethyl acetate (10:1) to afford 210.3 mg (0.86 mmol, 69%) of **S-25**.  $^1\text{H}$ -NMR (300 MHz,  $\text{CDCl}_3$ ):  $\delta$  3.96 (m, 1H), 3.65 (s, 2H), 2.15 (br s, 1H), 1.81 (dd,  $J = 12.3, 4.2$  Hz, 2H), 1.47 (ps t,  $J = 12.0$  Hz, 2H), 1.25 (2s, 6H), 1.22 (2s, 6H), 1.19 (2s, 6H);  $^{13}\text{C}$ -NMR (75 MHz,  $\text{CDCl}_3$ ):  $\delta$  84.0 (q), 70.7 (s), 63.1 (t), 60.5 (2q), 48.3 (2s), 33.2 (2p), 26.5 (2P), 21.2 (2p); IR (neat):  $\nu$  max 3342, 2966, 1488, 1376, 1166, 1047  $\text{cm}^{-1}$ . MS:  $m/z = 264$   $[\text{M}+\text{H}]^+$ . Anal. Calcd. for  $\text{C}_{13}\text{H}_{27}\text{NO}_3$ : C, 63.64; H, 11.09; N, 5.71. Found: C, 63.43; H, 11.17; N, 5.73.

**4-(4-Hydroxy-2,2,6,6-tetramethylpiperidin-1-yloxy)-butane-1,2,3-triol (S-26)**. 1.00 g (7.46 mmol) 2-deoxy-D-ribose was dissolved in 3.5 ml acetic acid/water (3:1), and 2.0 g (11.6 mmol) 4-hydroxy-TEMPO and CuCl (20 mg, 0.20 mmol) were added. 0.6 g (8.82 mmol) 50 %  $\text{H}_2\text{O}_2$  were added over a period of 2.5 h, and the reaction mixture was stirred over night at 30 °C. The reaction mixture was concentrated *in vacuo* at 35 °C. The residue was subjected to reversed phase column chromatography (25 g RP8 silica gel, methanol) to yield 1.22 g (4.40 mmol, 38%) **S-26** as a viscous, pale yellow oil.  $^1\text{H}$ -NMR (300 MHz, MeOD):  $\delta$  4.00 (m, 1H), 3.91 (m, 2H), 3.72 (m, 2H), 3.59 (m, 2H), 1.70 (dd,  $J = 12.3, 3.6$  Hz, 2H), 1.44 (m, 2H), 1.30 (s, 3H), 1.27 (s, 3H), 1.24 (s, 3H), 1.21 (s, 3H).  $^{13}\text{C}$ -NMR (75 MHz, MeOD):  $\delta$  79.8, 73.9, 72.5, 64.7, 63.5, 63.1, 62.3, 61.5, 61.4, 48.3, 48.1, 33.7, 31.6, 21.7, 21.2; IR (neat):  $\nu$  max 3334, 2973, 2931, 1736, 1593, 1456, 1362, 1046  $\text{cm}^{-1}$ ; HRMS (+ESI) calcd.  $[\text{C}_{13}\text{H}_{27}\text{NO}_5]^+$   $[\text{M}+\text{H}]^+$  MS: 278.1962 found 278.1959.

**1-Hydroxy-2,2,6,6-tetramethyl-4-piperidinol (S-27)**. 2.00 g (11.6 mmol) 4-hydroxy-TEMPO was dissolved in 6 ml 20 % formalin. CuCl (10 mg, 0.10 mmol) and 1.18 g (17.4 mmol) 50 %  $\text{H}_2\text{O}_2$  were added and the reaction mixture was stirred at 30 °C until complete disappearance of the nitroxide radical. The reaction mixture was concentrated *in vacuo*, and the crude product was subsequently recrystallized from ethanol under inert gas. **S-27** was obtained as white crystals (1.75 g, 10.1 mmol, 87%).  $^1\text{H}$ -NMR (300 MHz, DMSO- $d_6$ ):  $\delta$  7.00 (s, 1H), 4.37 (d,  $J = 4.8$  Hz, 1H), 3.74 (m, 1H), 1.71 (dd,  $J = 12.0, 4.2$  Hz, 2H), 1.24 (ps t,  $J = 11.8$ , 2H), 1.04 (2s, 6H), 1.01 (2s, 6H).  $^{13}\text{C}$ -NMR (75 MHz, DMSO- $d_6$ ):  $\delta$  62.0, 58.8, 49.0, 33.6, 21.1; MS:  $m/z = 174$   $[\text{M}+\text{H}]^+$ .

p19

7.283

**BRUKER  
BIOSPIN**

Current Data Parameters  
NAME 20060203-4-12  
EXPNO 1  
PROCNO 1

F2 - Acquisition Parameters  
Date\_ 20060203  
Time 9.33  
INSTRUM dpx400  
PROBHD 5 mm QNP 1H/15  
PULPROG zg30  
TD 65536  
SOLVENT CDC13  
NS 16  
DS 2  
SWH 8223.685 Hz  
FIDRES 0.125483 Hz  
AQ 3.9846387 sec  
RG 45.3  
DW 60.800 usec  
DE 7.50 usec  
TE 297.0 K  
D1 1.00000000 sec  
MCREST 0.00000000 sec  
MCWRK 0.01500000 sec

===== CHANNEL f1 =====  
NUC1 1H  
P1 8.20 usec  
PL1 -2.00 dB  
SFO1 400.1324008 MHz

F2 - Processing parameters  
SI 32768  
SF 400.1300000 MHz  
WDW EM  
SSB 0  
LB 0.30 Hz  
GB 0  
PC 1.00

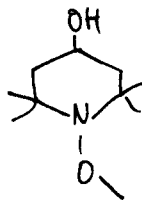

3.959  
3.939  
3.913  
3.657  
3.608  
3.558

1.813  
1.810  
1.803  
1.782  
1.776  
1.772  
1.644  
1.485  
1.456  
1.426  
1.285  
1.259  
1.248  
1.209  
1.179  
1.160  
1.129  
1.080

0.001

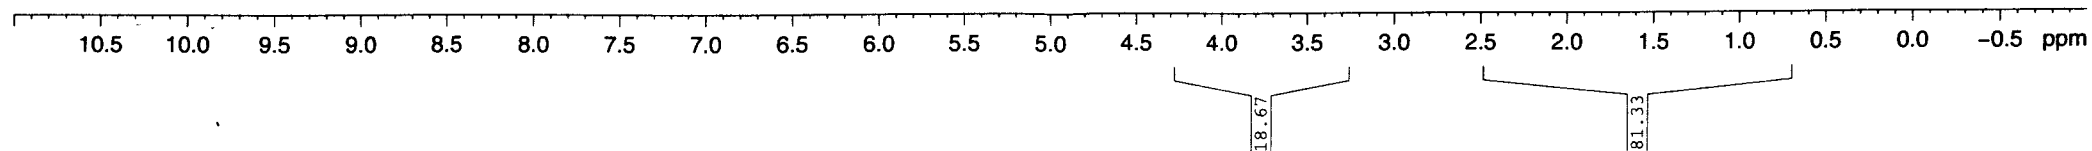

**BRUKER**  
**BIOSPIN**

Current Data Parameters  
NAME 20060203-4-12  
EXPNO 2  
PROCNO 1

F2 - Acquisition Parameters  
Date\_ 20060203  
Time 9.49  
INSTRUM dpx400  
PROBHD 5 mm QNP 1H/15  
PULPROG zgpg30  
TD 65536  
SOLVENT CDC13  
NS 256  
DS 4  
SWH 26315.789 Hz  
FIDRES 0.401547 Hz  
AQ 1.2452340 sec  
RG 3251  
DN 19.000 usec  
DE 10.00 usec  
TE 297.0 K  
D1 2.00000000 sec  
d11 0.03000000 sec  
MCREST 0.00000000 sec  
MCWRK 0.01500000 sec

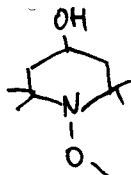

----- CHANNEL f1 -----  
NUC1 13C  
P1 6.10 usec  
PL1 -2.00 dB  
SFO1 100.6248421 MHz

----- CHANNEL f2 -----  
CPDPRG2 waltz16  
NUC2 1H  
PCPD2 80.00 usec  
PL2 -2.00 dB  
PL12 20.00 dB  
PL13 23.00 dB  
SFO2 400.1316005 MHz

F2 - Processing parameters  
SI 32768  
SF 100.6127690 MHz  
WDW EM  
SSB 0  
LB 1.00 Hz  
GB 0  
PC 1.40

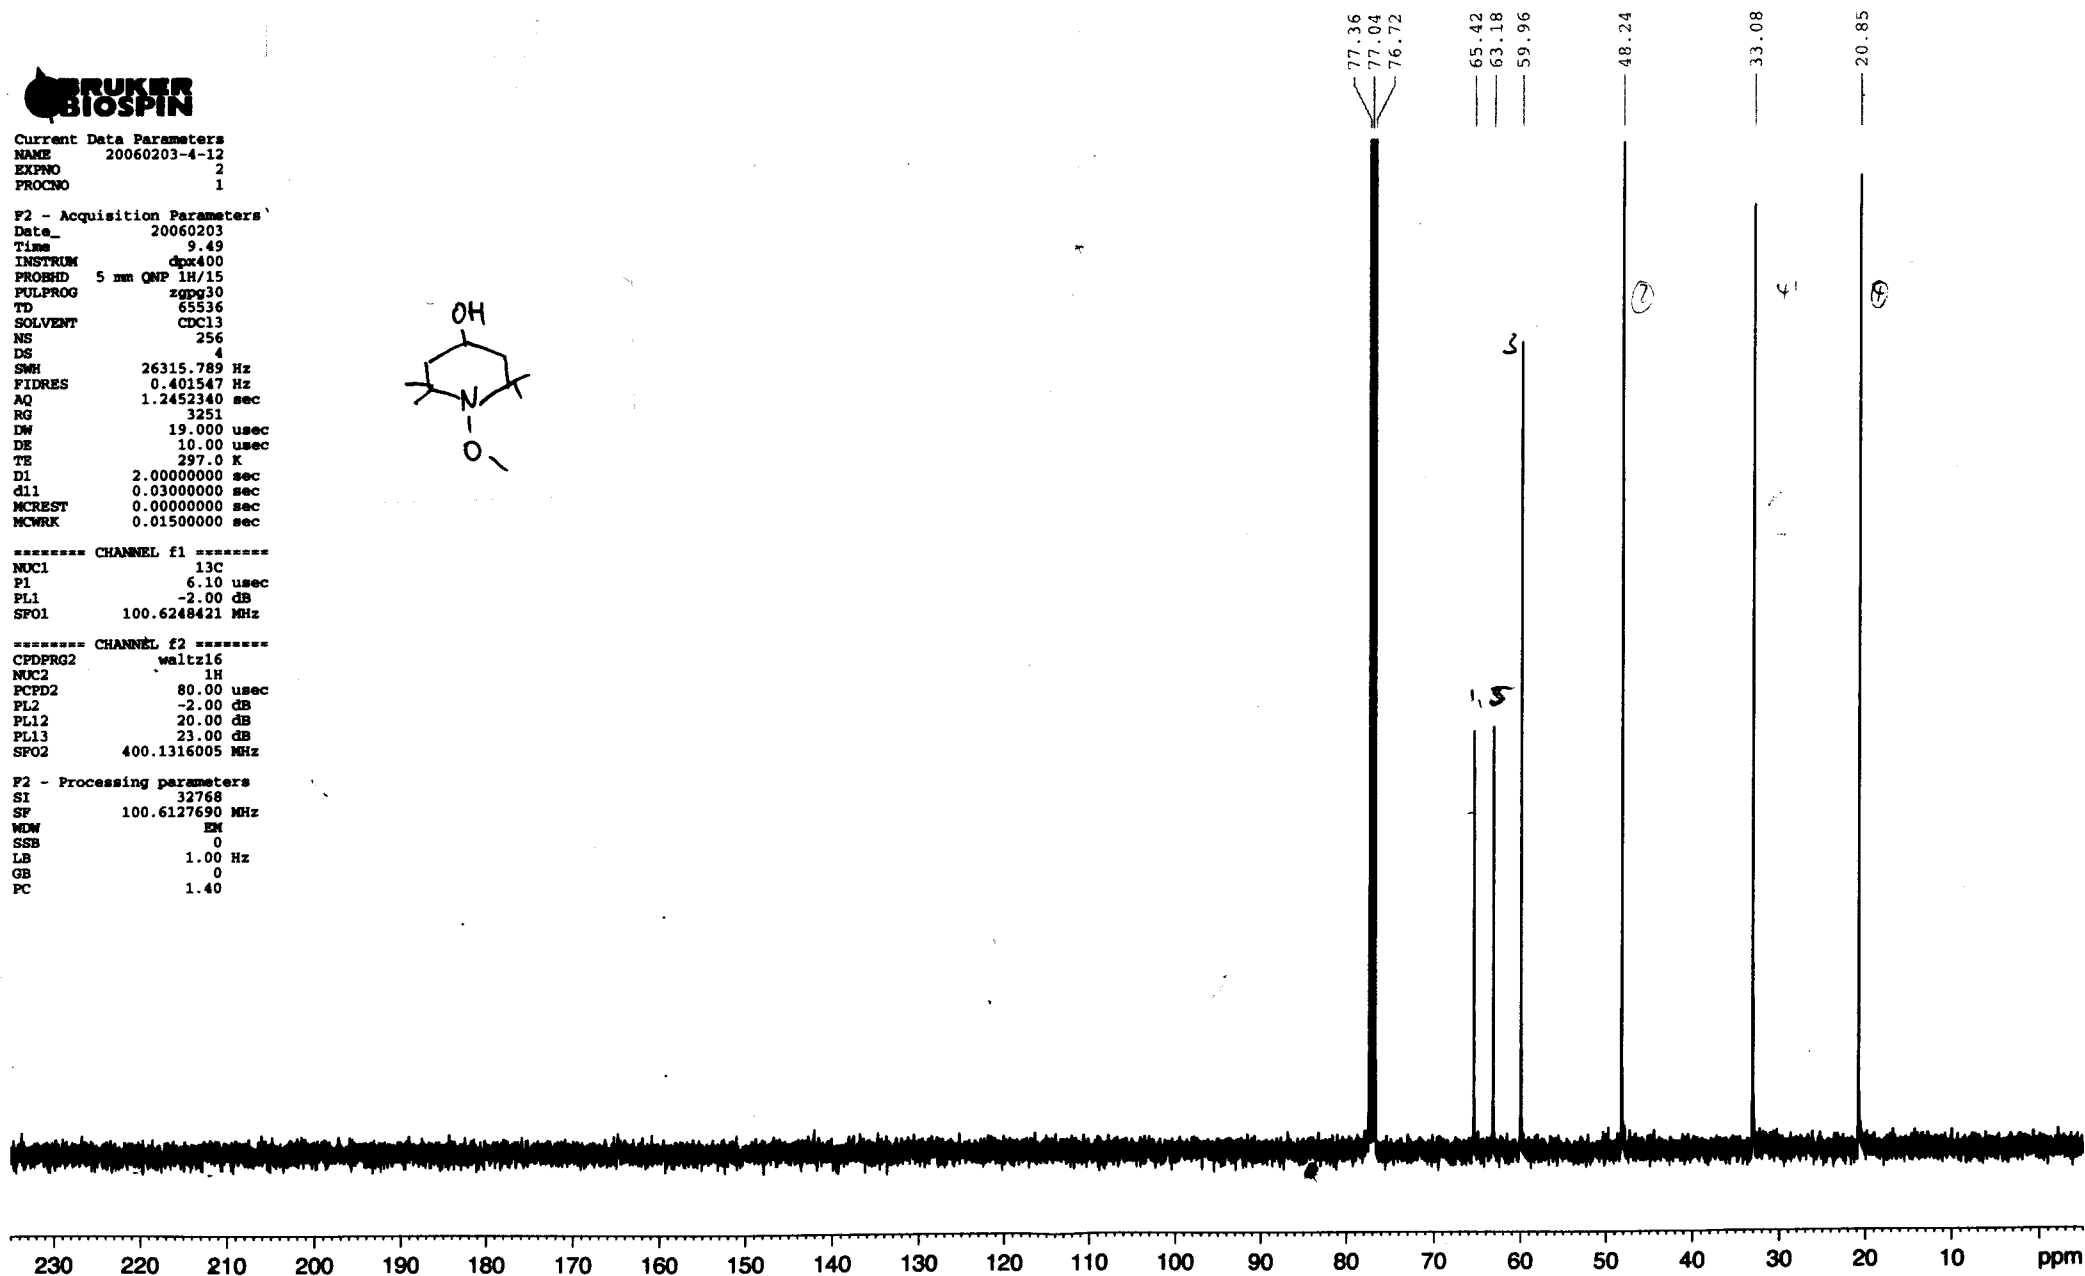

p21

7.280

5.309

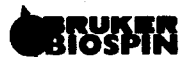

Current Data Parameters  
NAME 20060213-3-33  
EXPNO 1  
PROCNO 1

F2 - Acquisition Parameters  
Date\_ 20060213  
Time 16.16  
INSTRUM dpx300  
PROBHD 5 mm QNP 1H/13  
PULPROG zg30  
TD 65536  
SOLVENT CDC13  
NS 16  
DS 2  
SMH 6172.839 Hz  
FIDRES 0.094190 Hz  
AQ 5.3084660 sec  
RG 128  
DW 81.000 usec  
DE 6.50 usec  
TE 0.0 K  
D1 1.00000000 sec  
MCREST 0.00000000 sec  
MCNRK 0.01500000 sec

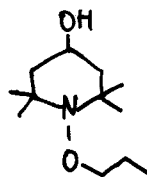

S-2

===== CHANNEL f1 =====  
NUC1 1H  
P1 7.40 usec  
PL1 -6.00 dB  
SFO1 300.1318008 MHz

F2 - Processing parameters  
SI 32768  
SF 300.1300000 MHz  
WDW EM  
SSB 0  
LB 0.30 Hz  
GB 0  
PC 1.00

3.993  
3.978  
3.955  
3.941  
3.918  
3.903  
3.785  
3.761  
3.737  
3.720  
3.698  
3.675  
3.613  
  
1.826  
1.813  
1.785  
1.777  
1.602  
1.578  
1.555  
1.530  
1.507  
1.495  
1.485  
1.468  
1.459  
1.418  
1.262  
1.215  
1.193  
1.151  
1.135  
1.111  
1.088  
0.967  
0.942  
0.917  
0.005

10.5 10.0 9.5 9.0 8.5 8.0 7.5 7.0 6.5 6.0 5.5 5.0 4.5 4.0 3.5 3.0 2.5 2.0 1.5 1.0 0.5 0.0 -0.5 ppm

00.00

**BRUKER  
BIOSPIN**

Current Data Parameters  
NAME 20060213-3-45  
EXPNO 1  
PROCNO 1

F2 - Acquisition Parameters  
Date\_ 20060213  
Time 22.23  
INSTRUM dpx300  
PROBHD 5 mm QNP 1H/13  
PULPROG zgpg30  
TD 65536  
SOLVENT CDCl3  
NS 1024  
DS 4  
SMH 19723.865 Hz  
FIDRES 0.300962 Hz  
AQ 1.6613876 sec  
RG 2048  
DW 25.350 usec  
DE 6.50 usec  
TE 0.0 K  
D1 2.00000000 sec  
d11 0.03000000 sec  
MCREST 0.00000000 sec  
MCNRK 0.01500000 sec

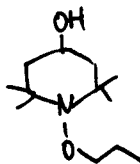

----- CHANNEL f1 -----  
NUC1 13C  
P1 5.00 usec  
PL1 -6.00 dB  
SFO1 75.4767751 MHz

----- CHANNEL f2 -----  
CPDPRG2 waltz16  
NUC2 1H  
PCPD2 80.00 usec  
PL2 -6.00 dB  
PL12 16.70 dB  
PL13 19.70 dB  
SFO2 300.1312005 MHz

F2 - Processing parameters  
SI 32768  
SF 75.4677190 MHz  
WDW EM  
SSB 0  
LB 1.00 Hz  
GB 0  
PC 1.40

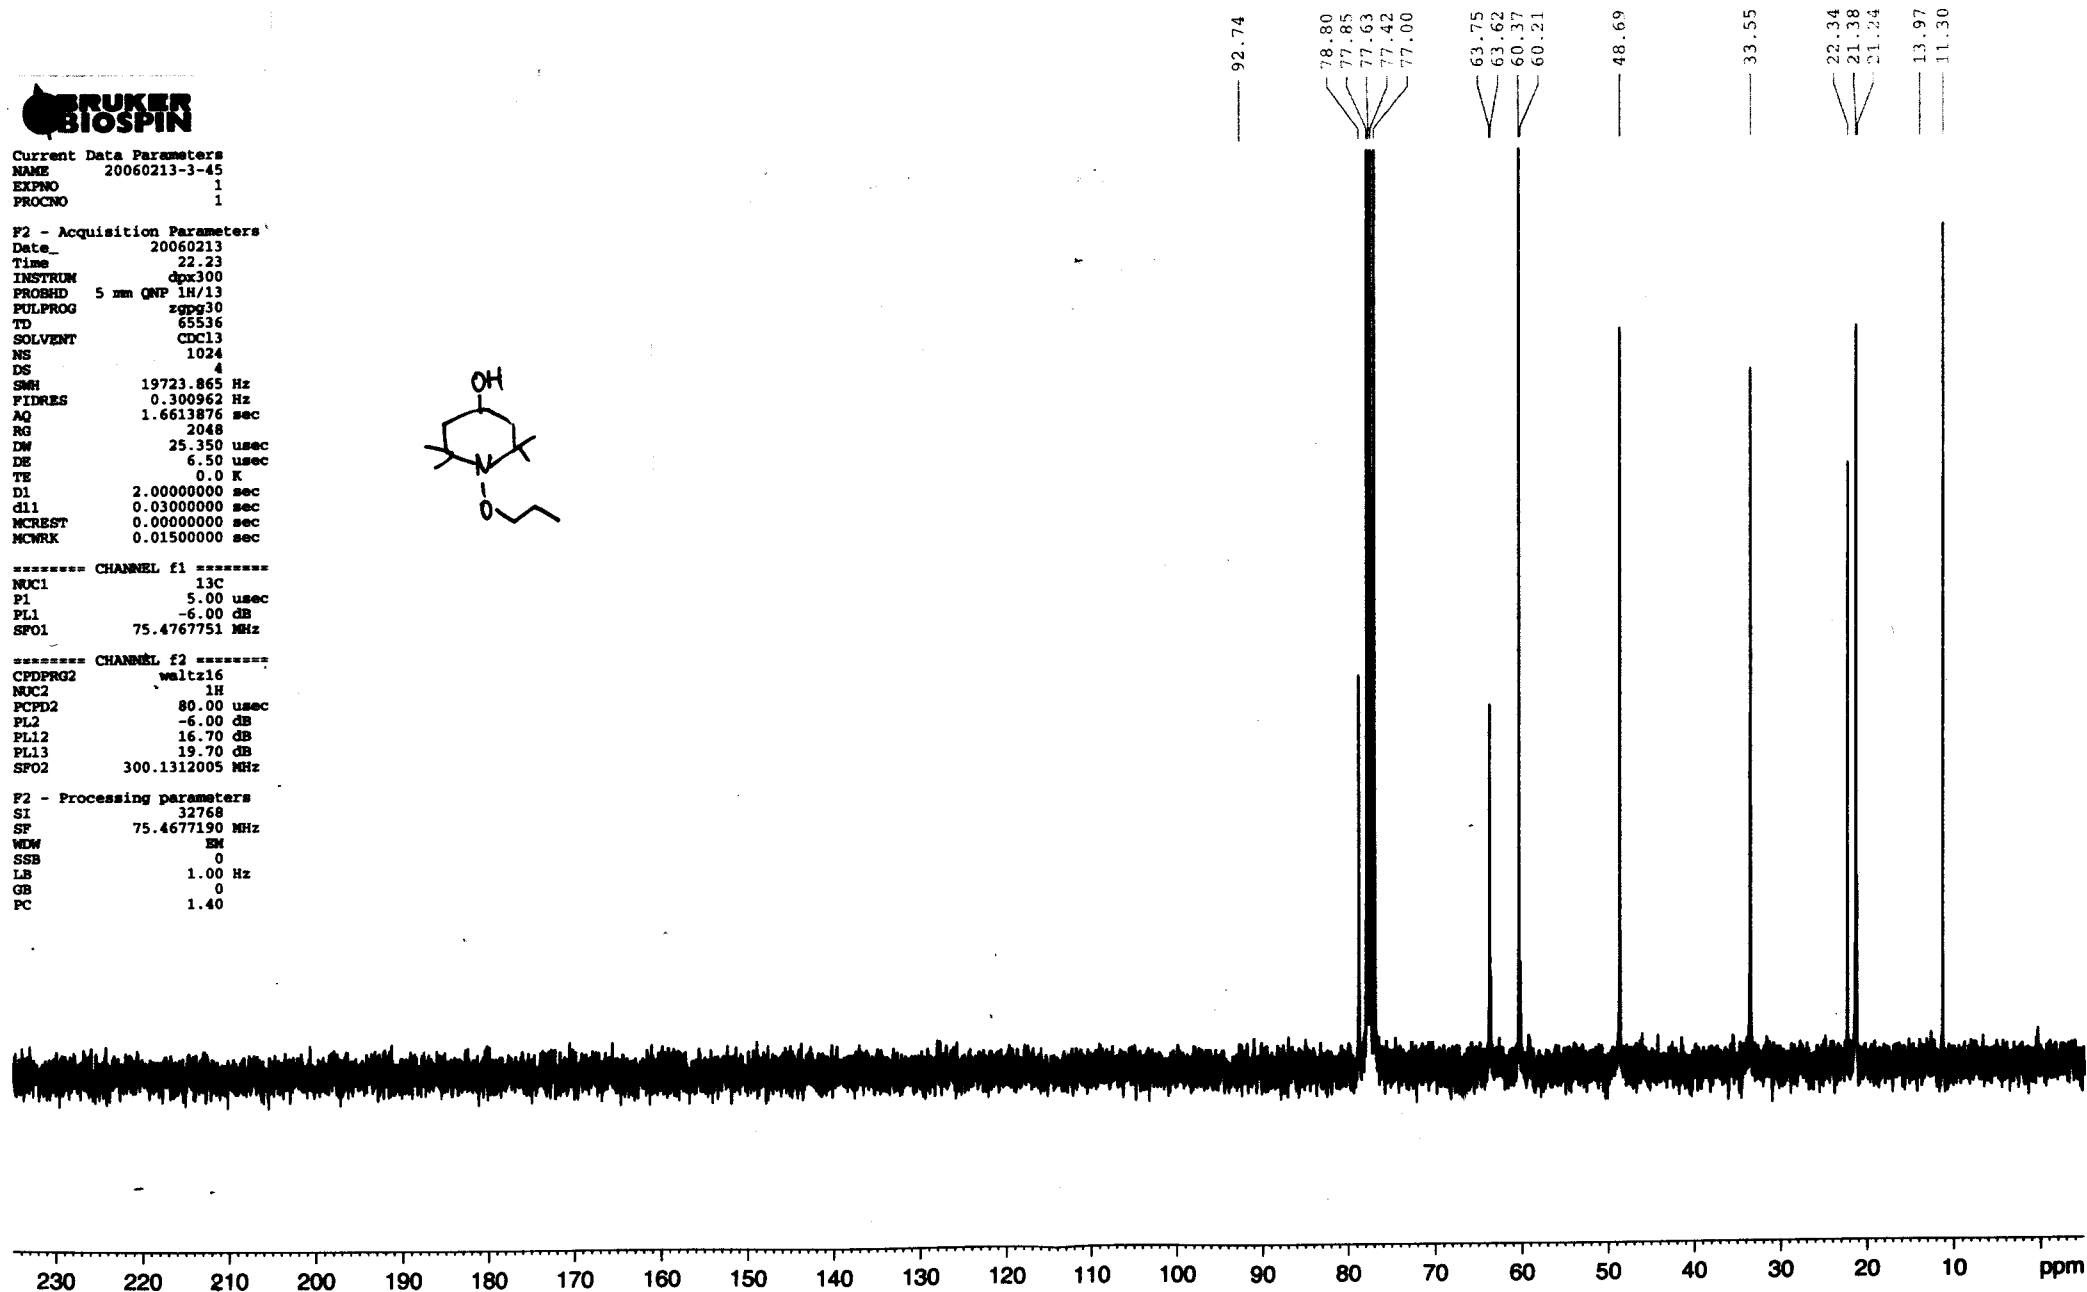

p23

7.285

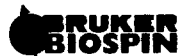

Current Data Parameters  
NAME 20060317-4-51  
EXPNO 1  
PROCNO 1

F2 - Acquisition Parameters  
Date\_ 20060317  
Time 7.50  
INSTRUM dpx400  
PROBHD 5 mm QNP 1H/15  
PULPROG zg30  
TD 65536  
SOLVENT CDC13  
NS 16  
DS 2  
SWH 8223.685 Hz  
FIDRES 0.125483 Hz  
AQ 3.9846387 sec  
RG 71.8  
DW 60.800 usec  
DE 7.50 usec  
TE 297.0 K  
D1 1.00000000 sec  
MCREST 0.00000000 sec  
MCWRK 0.01500000 sec

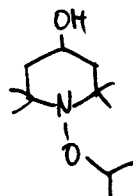

S-3

===== CHANNEL f1 =====  
NUC1 1H  
P1 8.20 usec  
PL1 -2.00 dB  
SFO1 400.1324008 MHz

F2 - Processing parameters  
SI 32768  
SF 400.1300000 MHz  
WDW EM  
SSB 0  
LB 0.30 Hz  
GB 0  
PC 1.00

4.035  
4.020  
4.004  
3.989  
3.973  
3.966  
3.938

2.303  
1.831  
1.822  
1.801  
1.503  
1.475  
1.445  
1.395  
1.377  
1.315  
1.310  
1.193  
1.176  
1.160  
1.155  
1.043

0.015

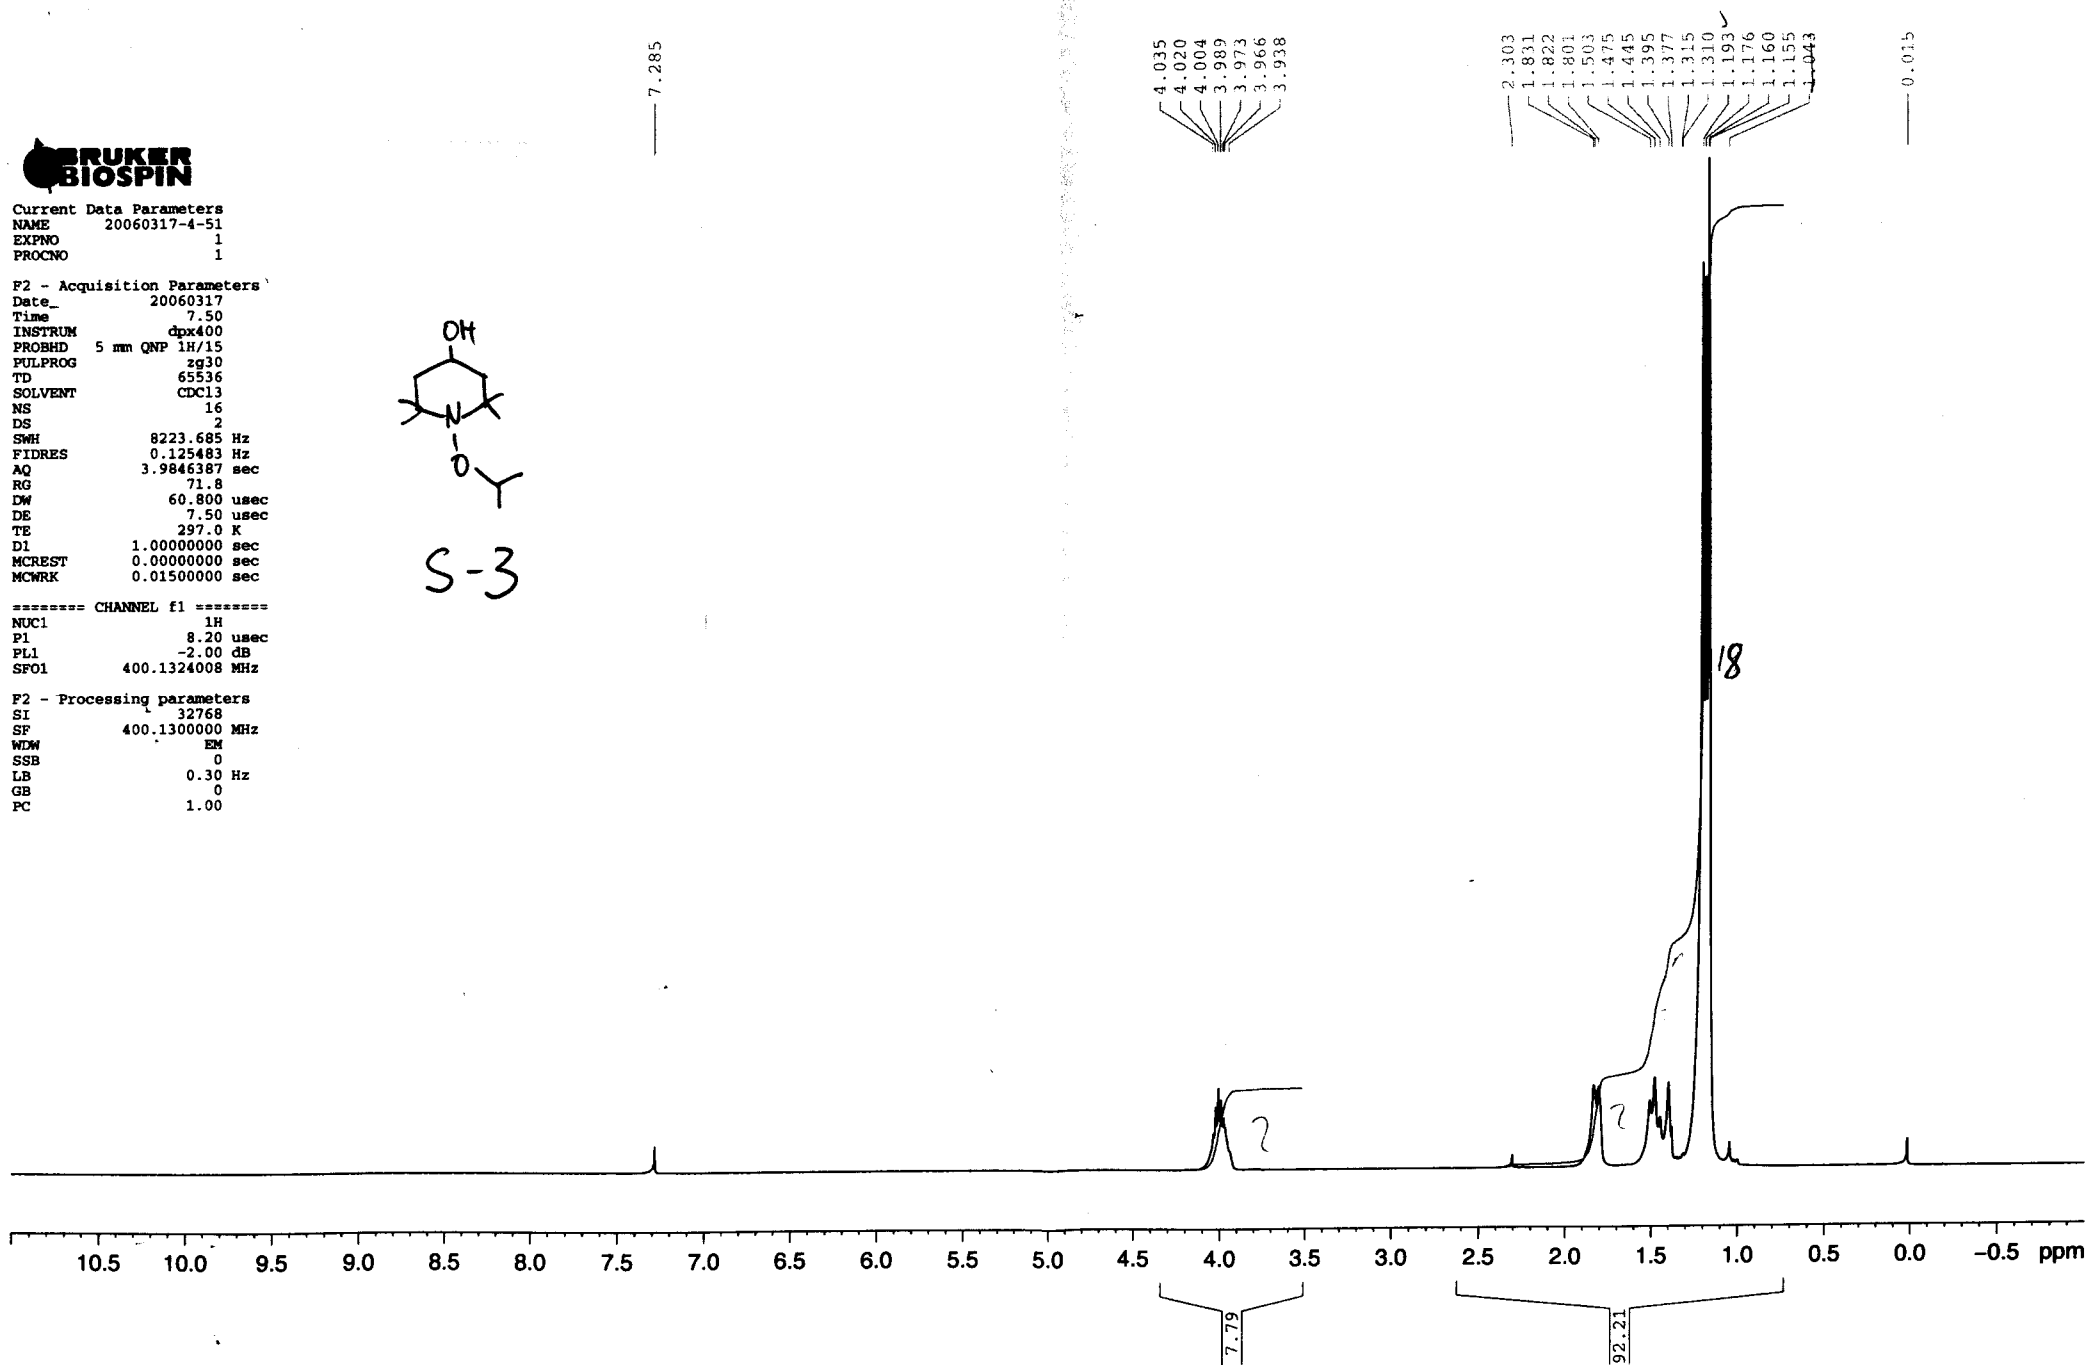

**BRUKER  
BIOSPIN**

Current Data Parameters  
NAME 20060317-4-51  
EXPNO 2  
PROCNO 1

F2 - Acquisition Parameters  
Date\_ 20060317  
Time 8.06  
INSTRUM dpx400  
PROBHD 5 mm QNP 1H/15  
PULPROG zgpg30  
TD 65536  
SOLVENT CDC13  
NS 256  
DS 4  
SWH 26315.789 Hz  
FIDRES 0.401547 Hz  
AQ 1.2452340 sec  
RG 5160.6  
DW 19.000 usec  
DE 10.00 usec  
TE 297.0 K  
D1 2.00000000 sec  
d11 0.03000000 sec  
MCREST 0.00000000 sec  
MCWRK 0.01500000 sec

===== CHANNEL f1 =====  
NUC1 13C  
P1 6.10 usec  
PL1 -2.00 dB  
SFO1 100.6248421 MHz

===== CHANNEL f2 =====  
CPDPRG2 waltz16  
NUC2 1H  
PCPD2 80.00 usec  
PL2 -2.00 dB  
PL12 20.00 dB  
PL13 23.00 dB  
SFO2 400.1316005 MHz

F2 - Processing parameters  
SI 32768  
SF 100.6127690 MHz  
WDW EM  
SSB 0  
LB 1.00 Hz  
GB 0  
PC 1.40

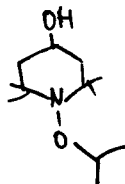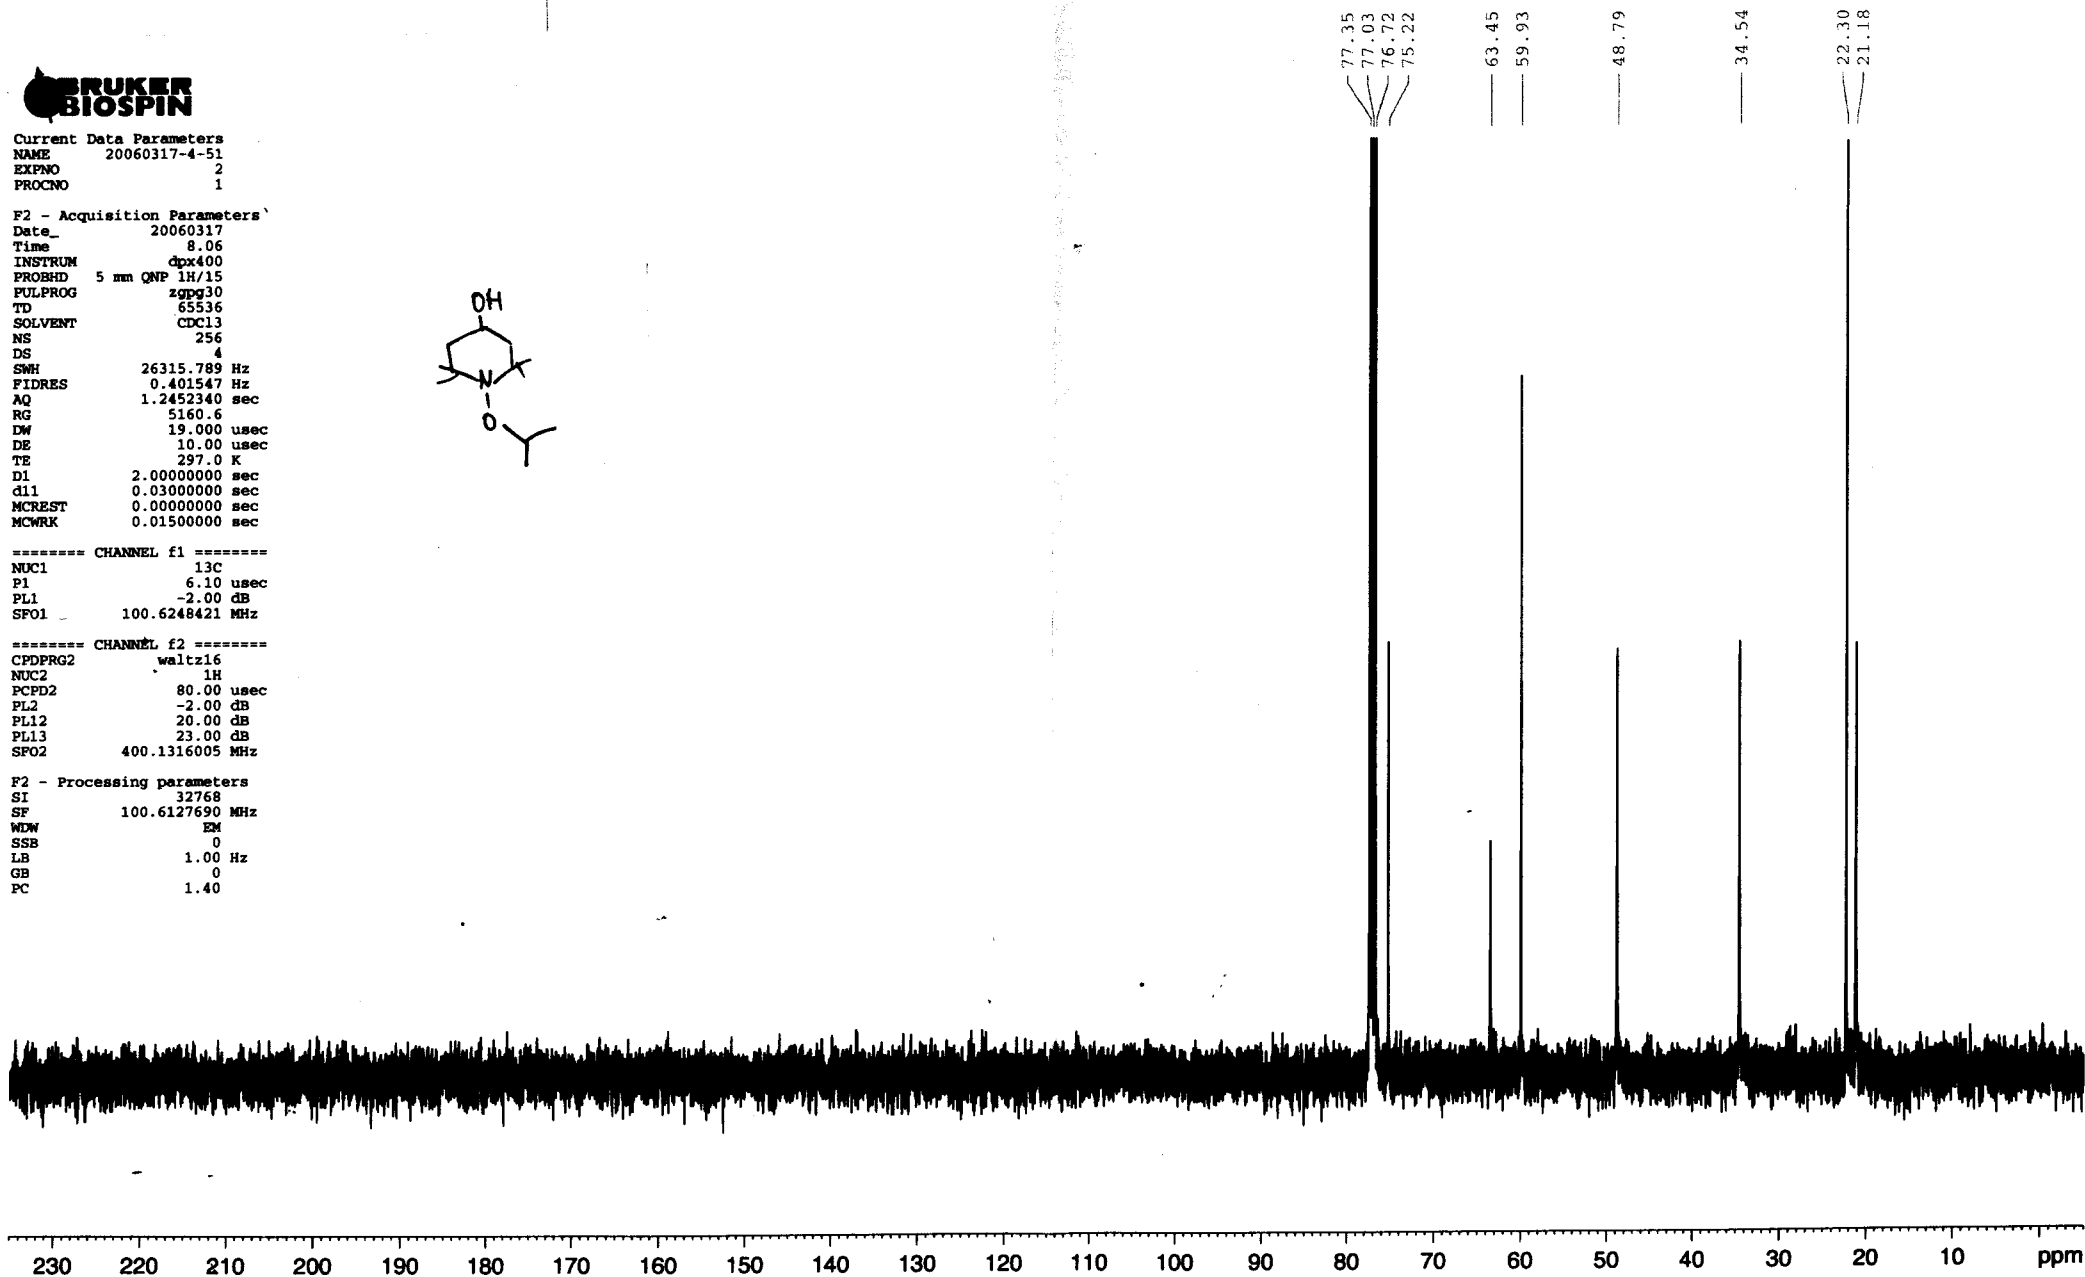

7.285

**BRUKER**  
**BIOSPIN**

Current Data Parameters  
NAME 20060613-4-7  
EXPNO 1  
PROCNO 1

F2 - Acquisition Parameters  
Date\_ 20060613  
Time 14.19  
INSTRUM dpx400  
PROBHD 5 mm QNP 1H/15  
PULPROG zg30  
TD 65536  
SOLVENT CDCl3  
NS 16  
DS 2  
SMH 8223.685 Hz  
FIDRES 0.125483 Hz  
AQ 3.9846387 sec  
RG 114  
DW 60.800 usec  
DE 7.50 usec  
TE 297.0 K  
D1 1.00000000 sec  
MCREST 0.00000000 sec  
MCMRK 0.01500000 sec

\*\*\*\*\* CHANNEL f1 \*\*\*\*\*  
NUC1 1H  
P1 8.20 usec  
PL1 -2.00 dB  
SFO1 400.1324008 MHz

F2 - Processing parameters  
SI 32768  
SF 400.1300000 MHz  
WDW EM  
SSB 0  
LB 0.30 Hz  
GB 0  
PC 1.00

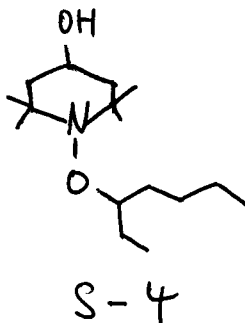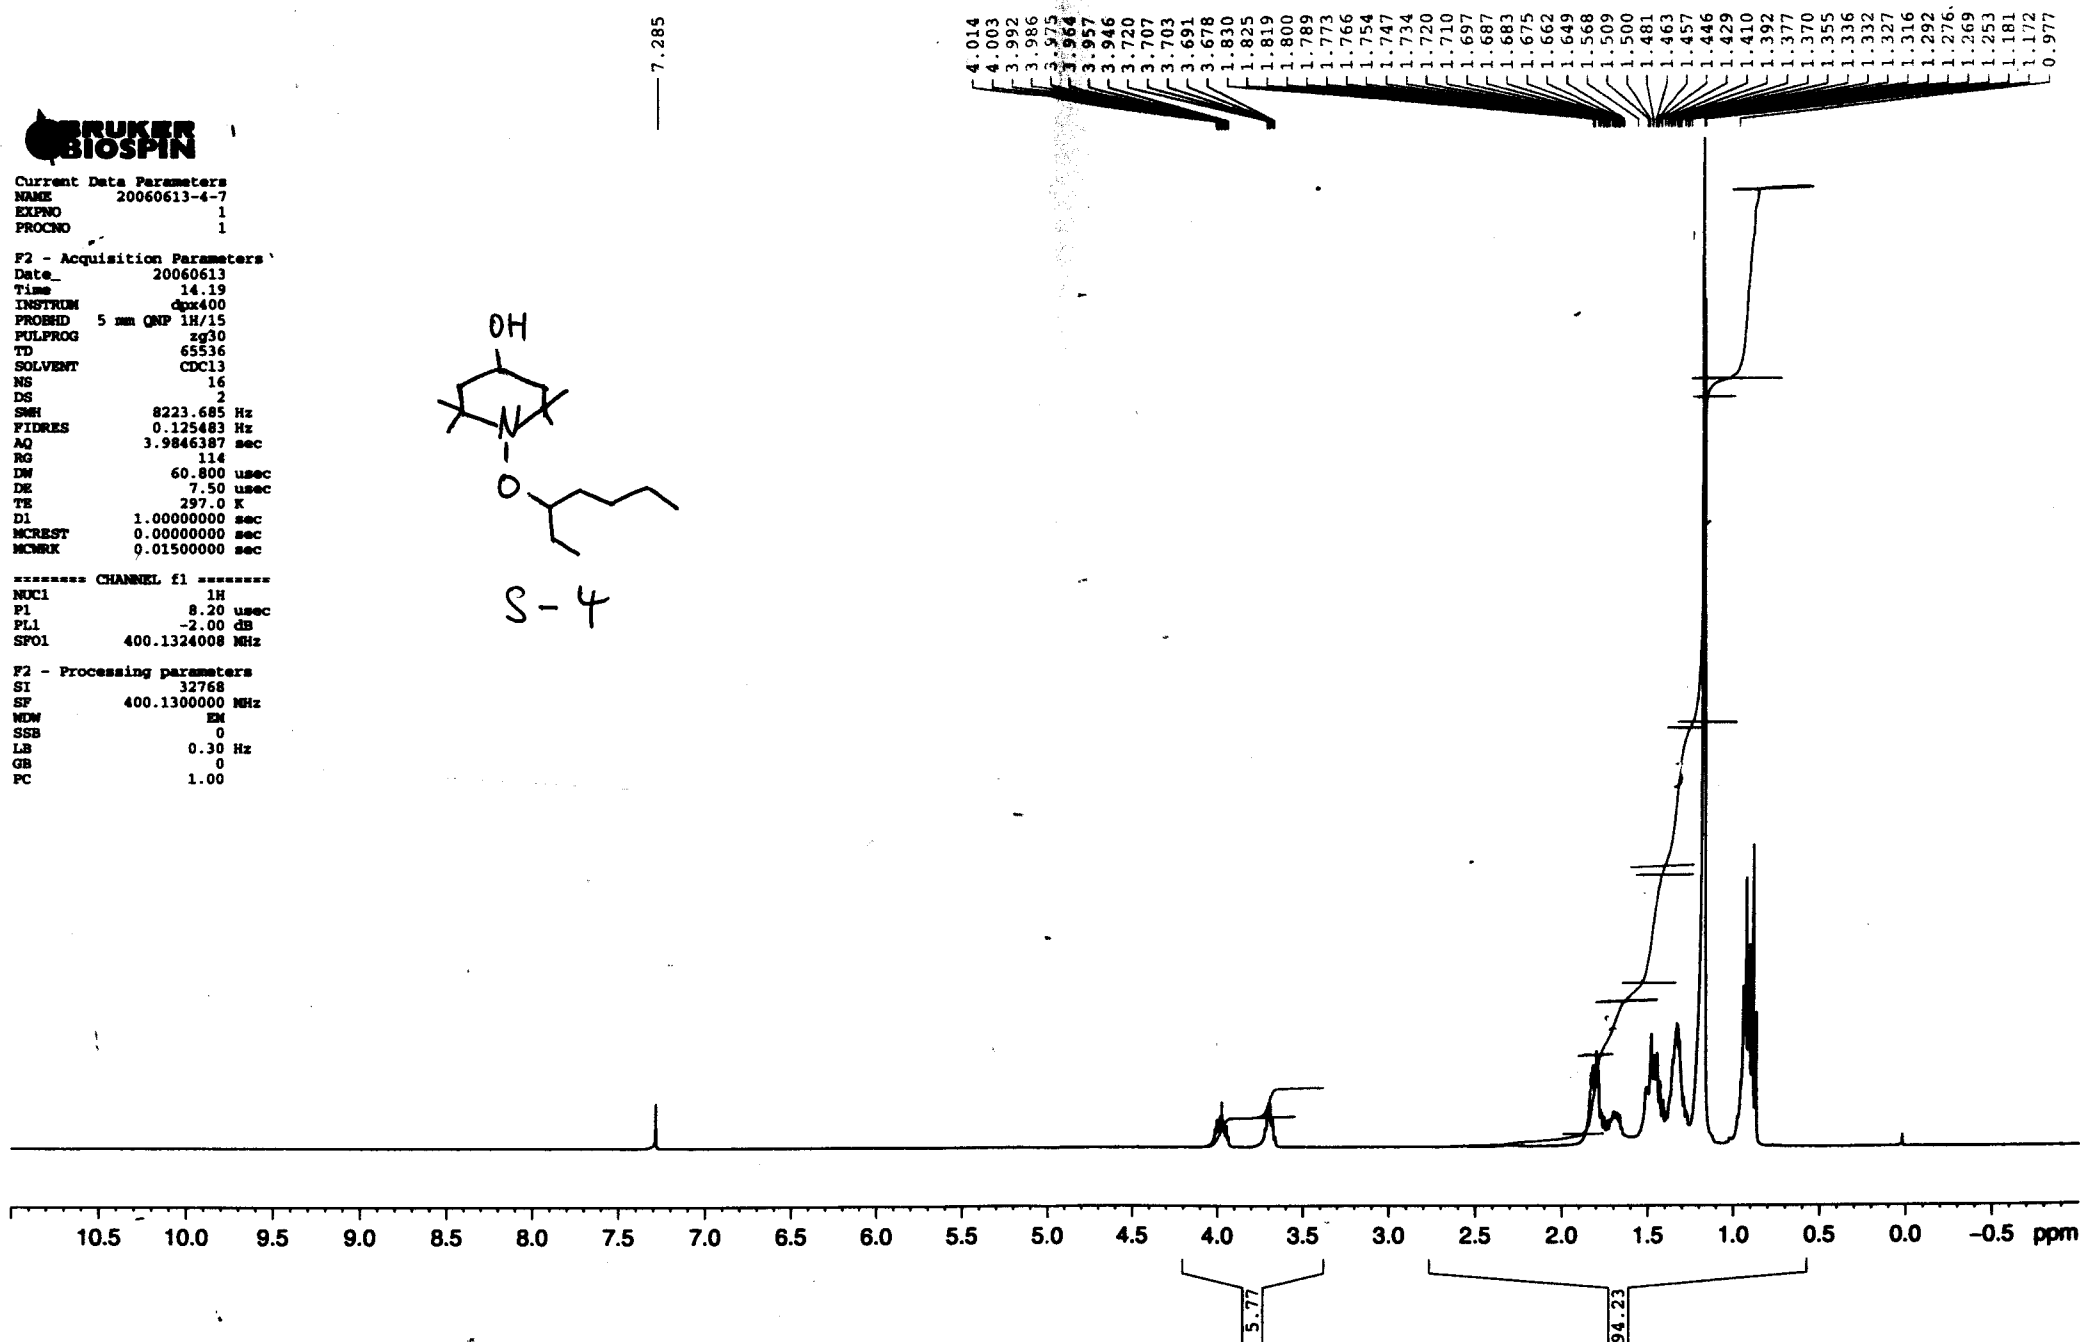

AD\_C13PD2k CDCI3

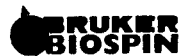

Current Data Parameters  
NAME 20060613-4-9  
EXPNO 1  
PROCNO 1

F2 - Acquisition Parameters  
Date\_ 20060613  
Time 22.05  
INSTRUM dpx400  
PROBHD 5 mm QNP 1H/15  
PULPROG zgpg30  
TD 65536  
SOLVENT CDCI3  
NS 2048  
DS 4  
SWH 26315.789 Hz  
FIDRES 0.401547 Hz  
AQ 1.2452340 sec  
RG 1824.6  
DW 19.000 usec  
DE 10.00 usec  
TE 298.4 K  
D1 2.0000000 sec  
d11 0.03000000 sec  
MCREST 0.00000000 sec  
MCWRK 0.01500000 sec

===== CHANNEL f1 =====  
NUC1 13C  
P1 6.10 usec  
PL1 -2.00 dB  
SFO1 100.6248421 MHz

===== CHANNEL f2 =====  
CPDPRG2 waltz16  
NUC2 1H  
PCPD2 80.00 usec  
PL2 -2.00 dB  
PL12 20.00 dB  
PL13 23.00 dB  
SFO2 400.1316005 MHz

F2 - Processing parameters  
SI 32768  
SF 100.6127690 MHz  
WDW EM  
SSB 0  
LB 1.00 Hz  
GB 0  
PC 1.40

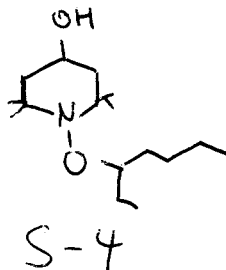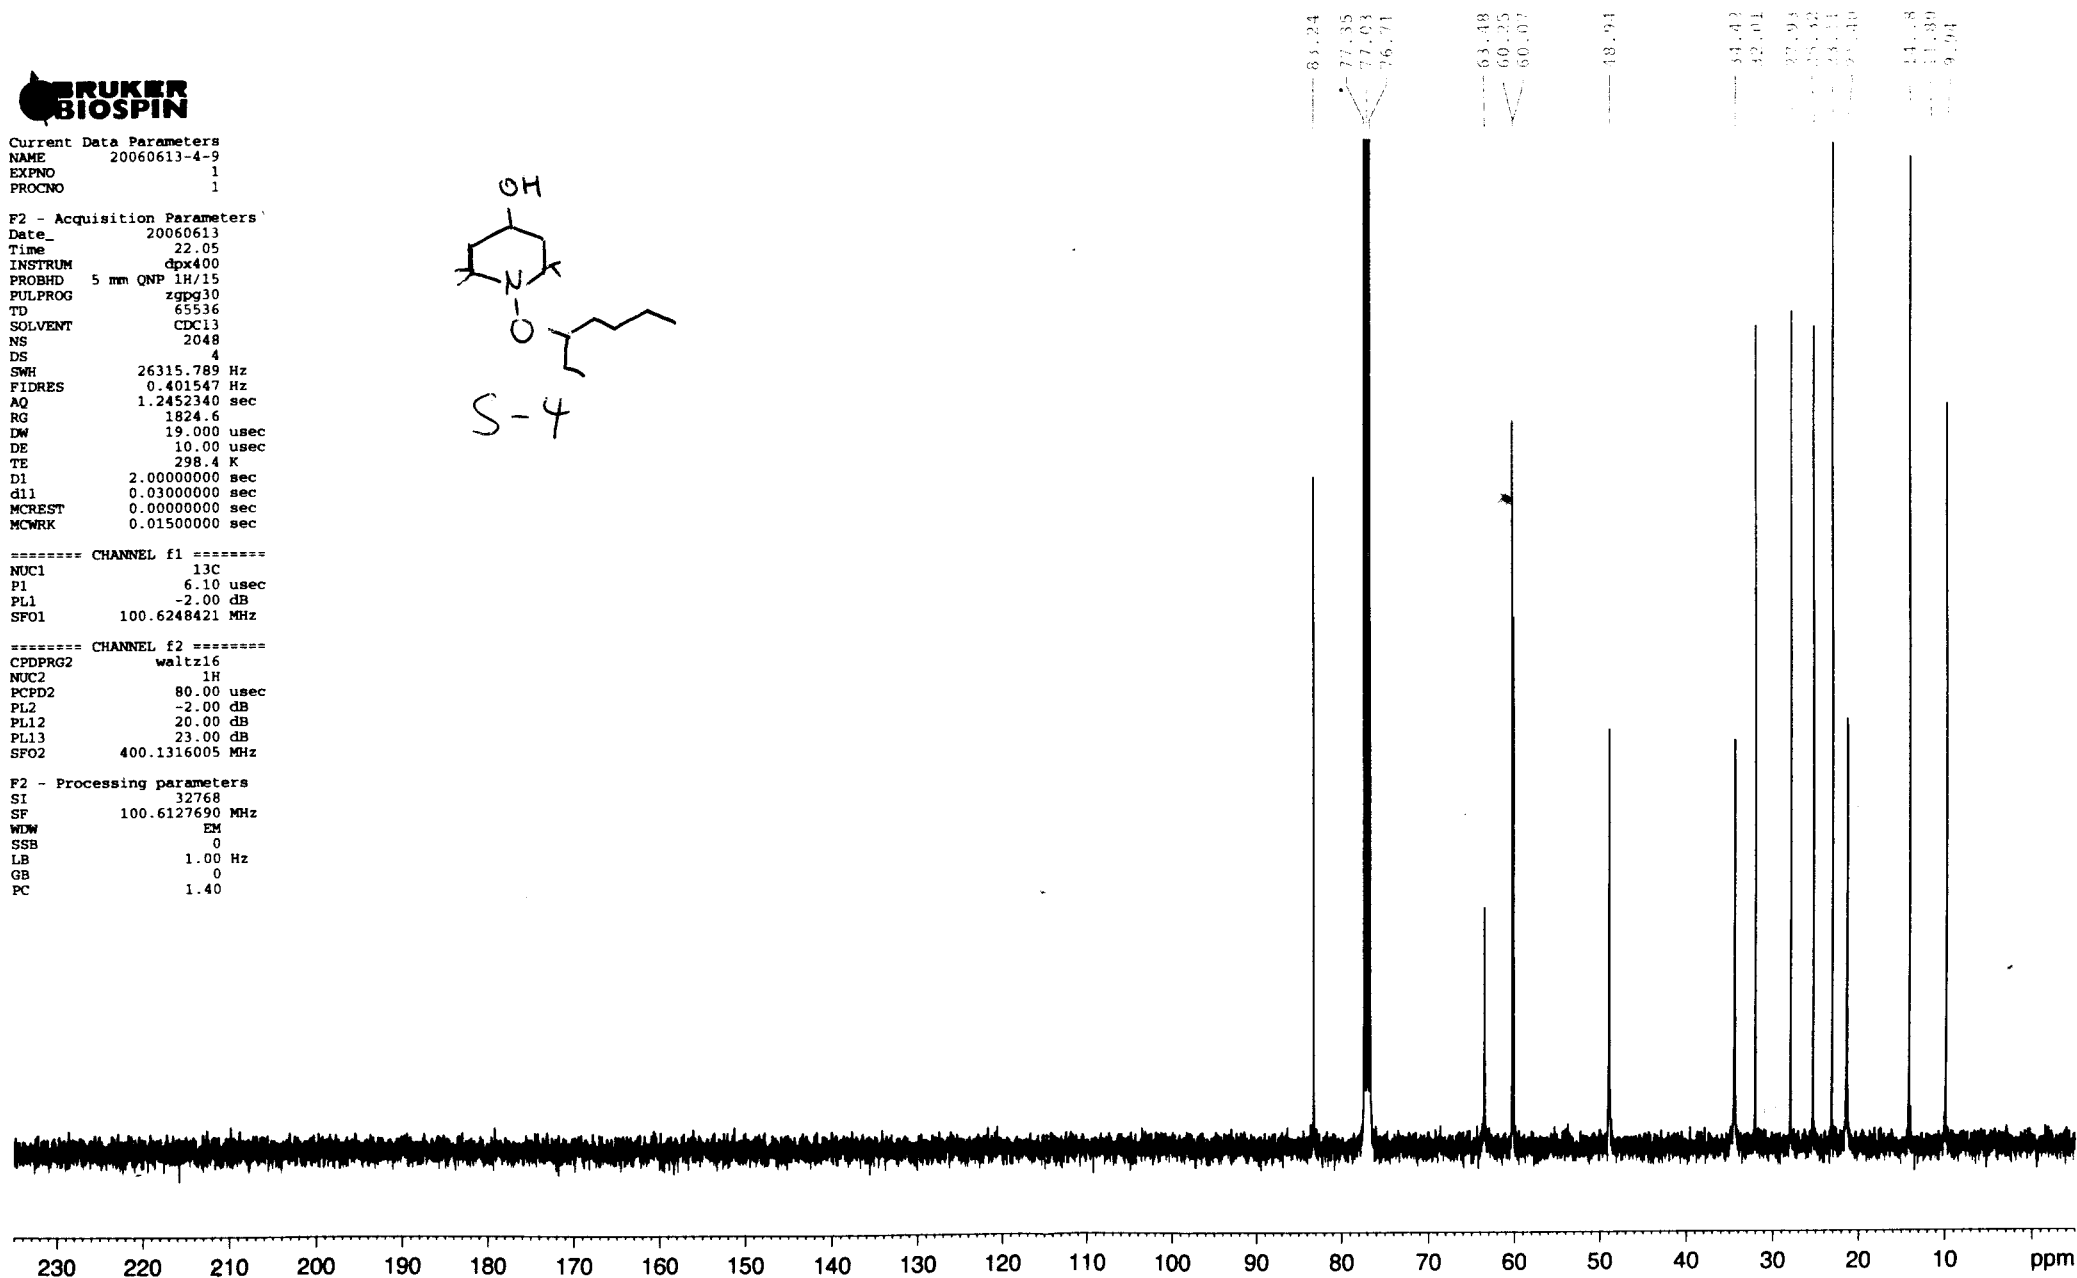

Current Data Parameters  
NAME 20070116-400-26  
EXPNO 10  
PROCNO 1

F2 - Acquisition Parameters  
Date\_ 20070116  
Time 17.22  
INSTRUM dpx400  
PROBHD 5 mm QNP 1H/15  
PULPROG zg30  
TD 65536  
SOLVENT CDC13  
NS 16  
DS 2  
SWH 8223.685 Hz  
FIDRES 0.125483 Hz  
AQ 3.9846387 sec  
RG 22.6  
DW 60.800 usec  
DE 7.50 usec  
TE 294.8 K  
D1 1.00000000 sec  
TD0 1

===== CHANNEL f1 =====  
NUC1 1H  
P1 8.20 usec  
PL1 -4.00 dB  
SFO1 400.1324008 MHz

F2 - Processing parameters  
SI 32768  
SF 400.1300014 MHz  
WDW EM  
SSB 0  
LB 0.30 Hz  
GB 0  
PC 1.00

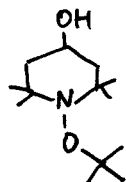

S-5

3.954  
3.936  
3.926  
3.915  
3.897

1.283  
1.236  
1.232  
1.226  
1.205  
1.199  
1.195  
1.179  
1.150  
1.120  
1.282  
1.164  
1.128

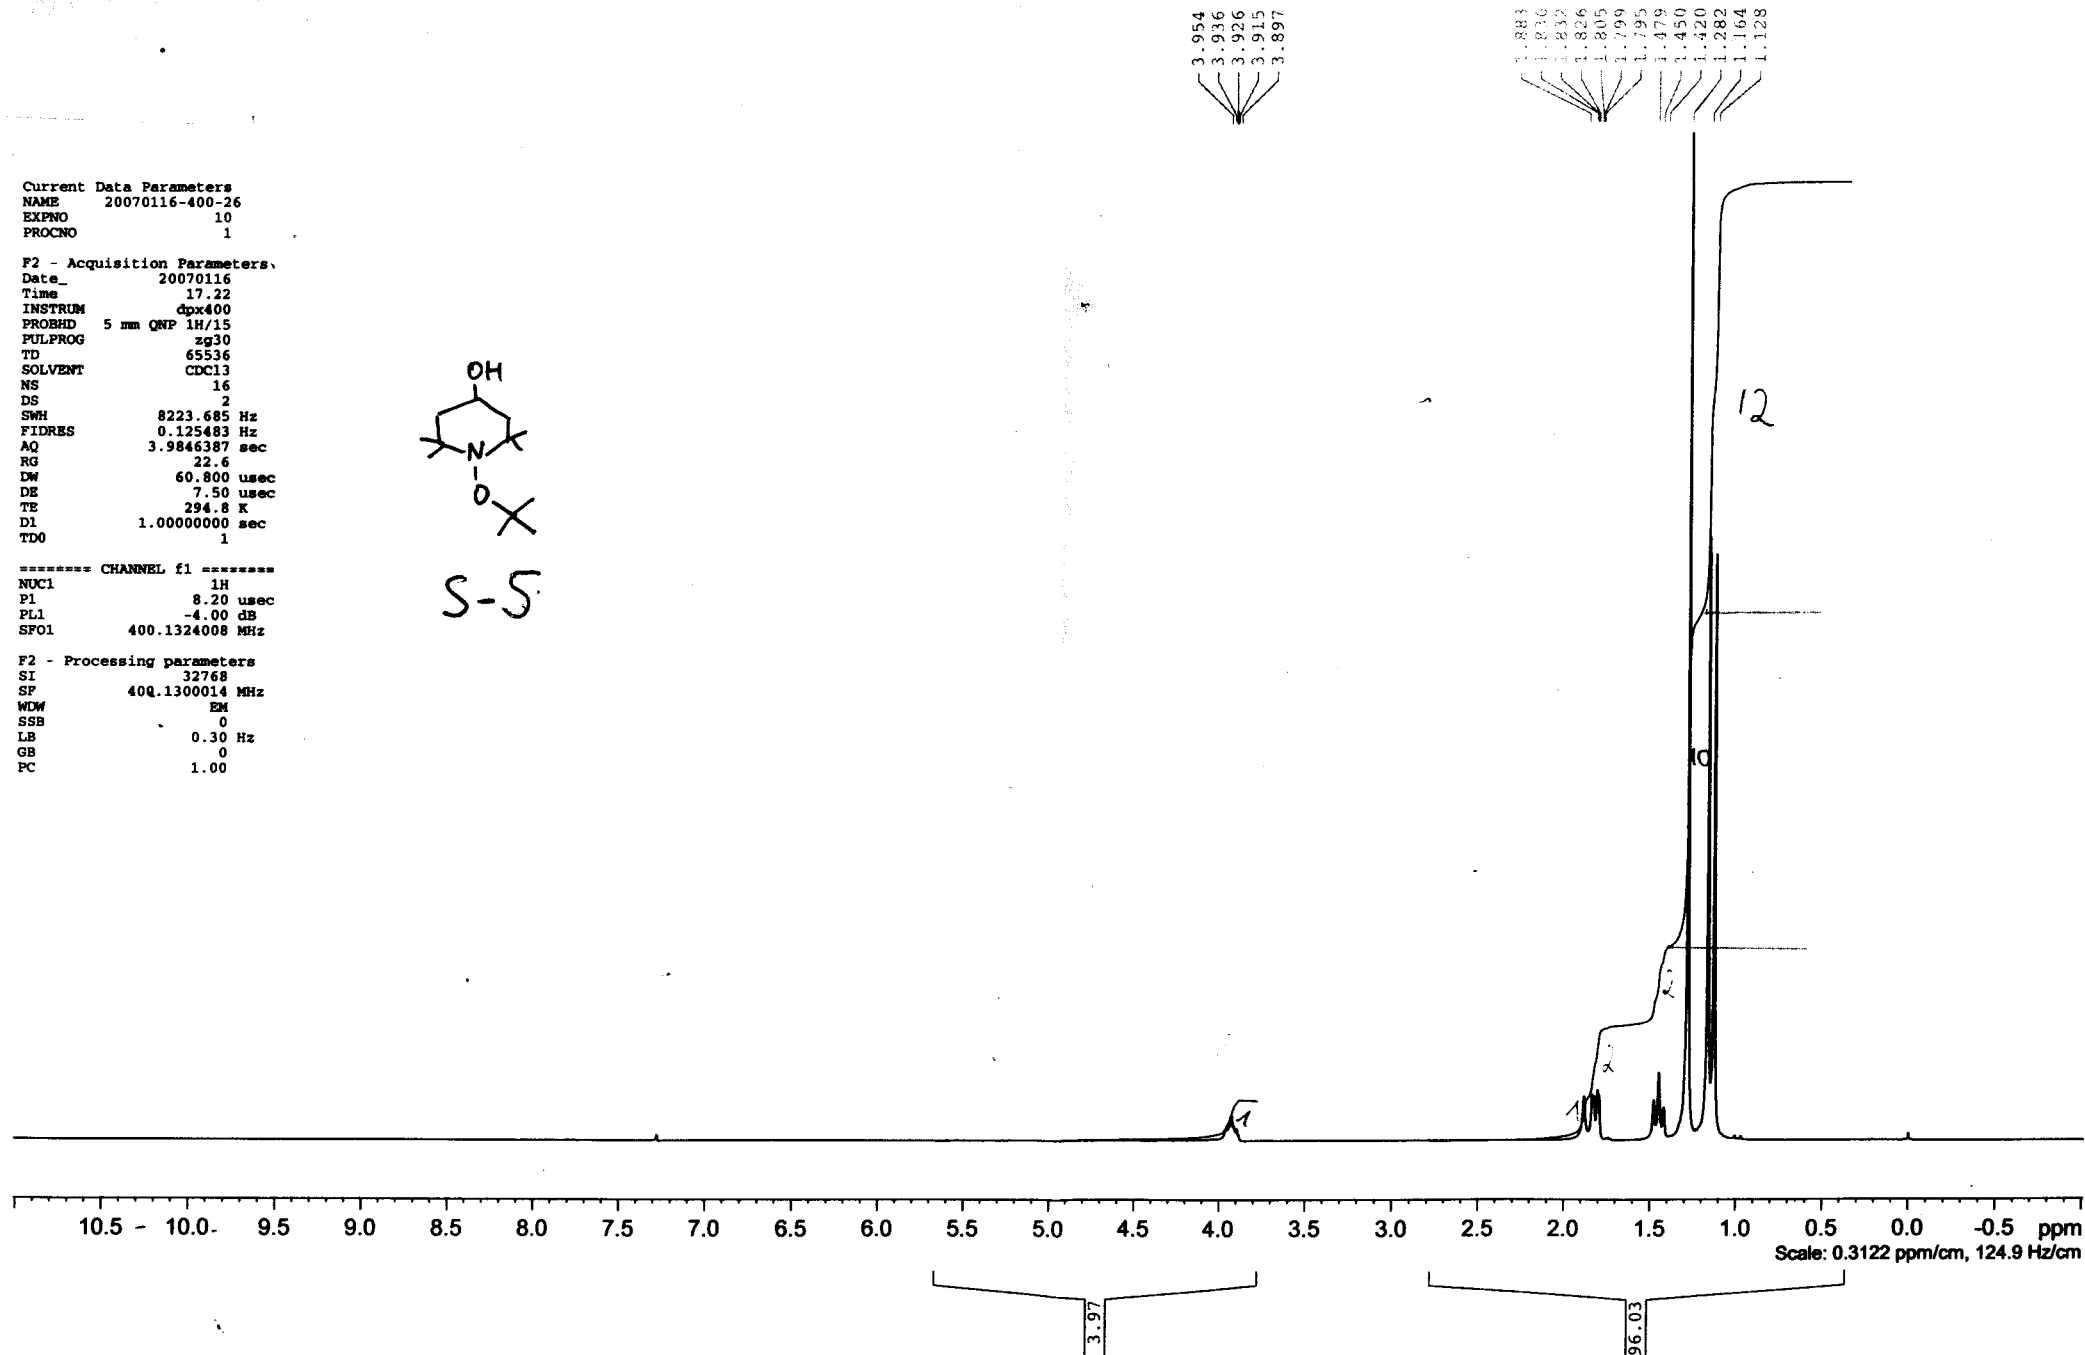

Current Data Parameters  
NAME 20070116-400-26  
EXPNO 11  
PROCNO 1

F2 - Acquisition Parameters  
Date\_ 20070116  
Time 21.03  
INSTRUM dpx400  
PROBHD 5 mm QNP 1H/15  
PULPROG jmod  
TD 65536  
SOLVENT CDC13  
NS 1024  
DS 4  
SWH 26315.789 Hz  
FIDRES 0.401547 Hz  
AQ 1.2452340 sec  
RG 512  
DW 19.000 usec  
DE 10.00 usec  
TE 294.9 K  
CNST2 145.0000000  
CNST11 1.0000000  
D1 2.00000000 sec  
d20 0.00689655 sec  
DELTA 0.0000891 sec  
TD0 1

===== CHANNEL f1 =====  
NUC1 13C  
P1 7.00 usec  
p2 14.00 usec  
PL1 -3.50 dB  
SFO1 100.6248421 MHz

===== CHANNEL f2 =====  
CPDPRG2 waltz16  
NUC2 1H  
PCPD2 100.00 usec  
PL2 -4.00 dB  
PL12 21.00 dB  
SFO2 400.1316005 MHz

F2 - Processing parameters  
SI 32768  
SF 100.6127690 MHz  
WDW EM  
SSB 0  
LB 1.00 Hz  
GB 0  
PC 1.40

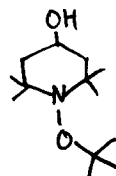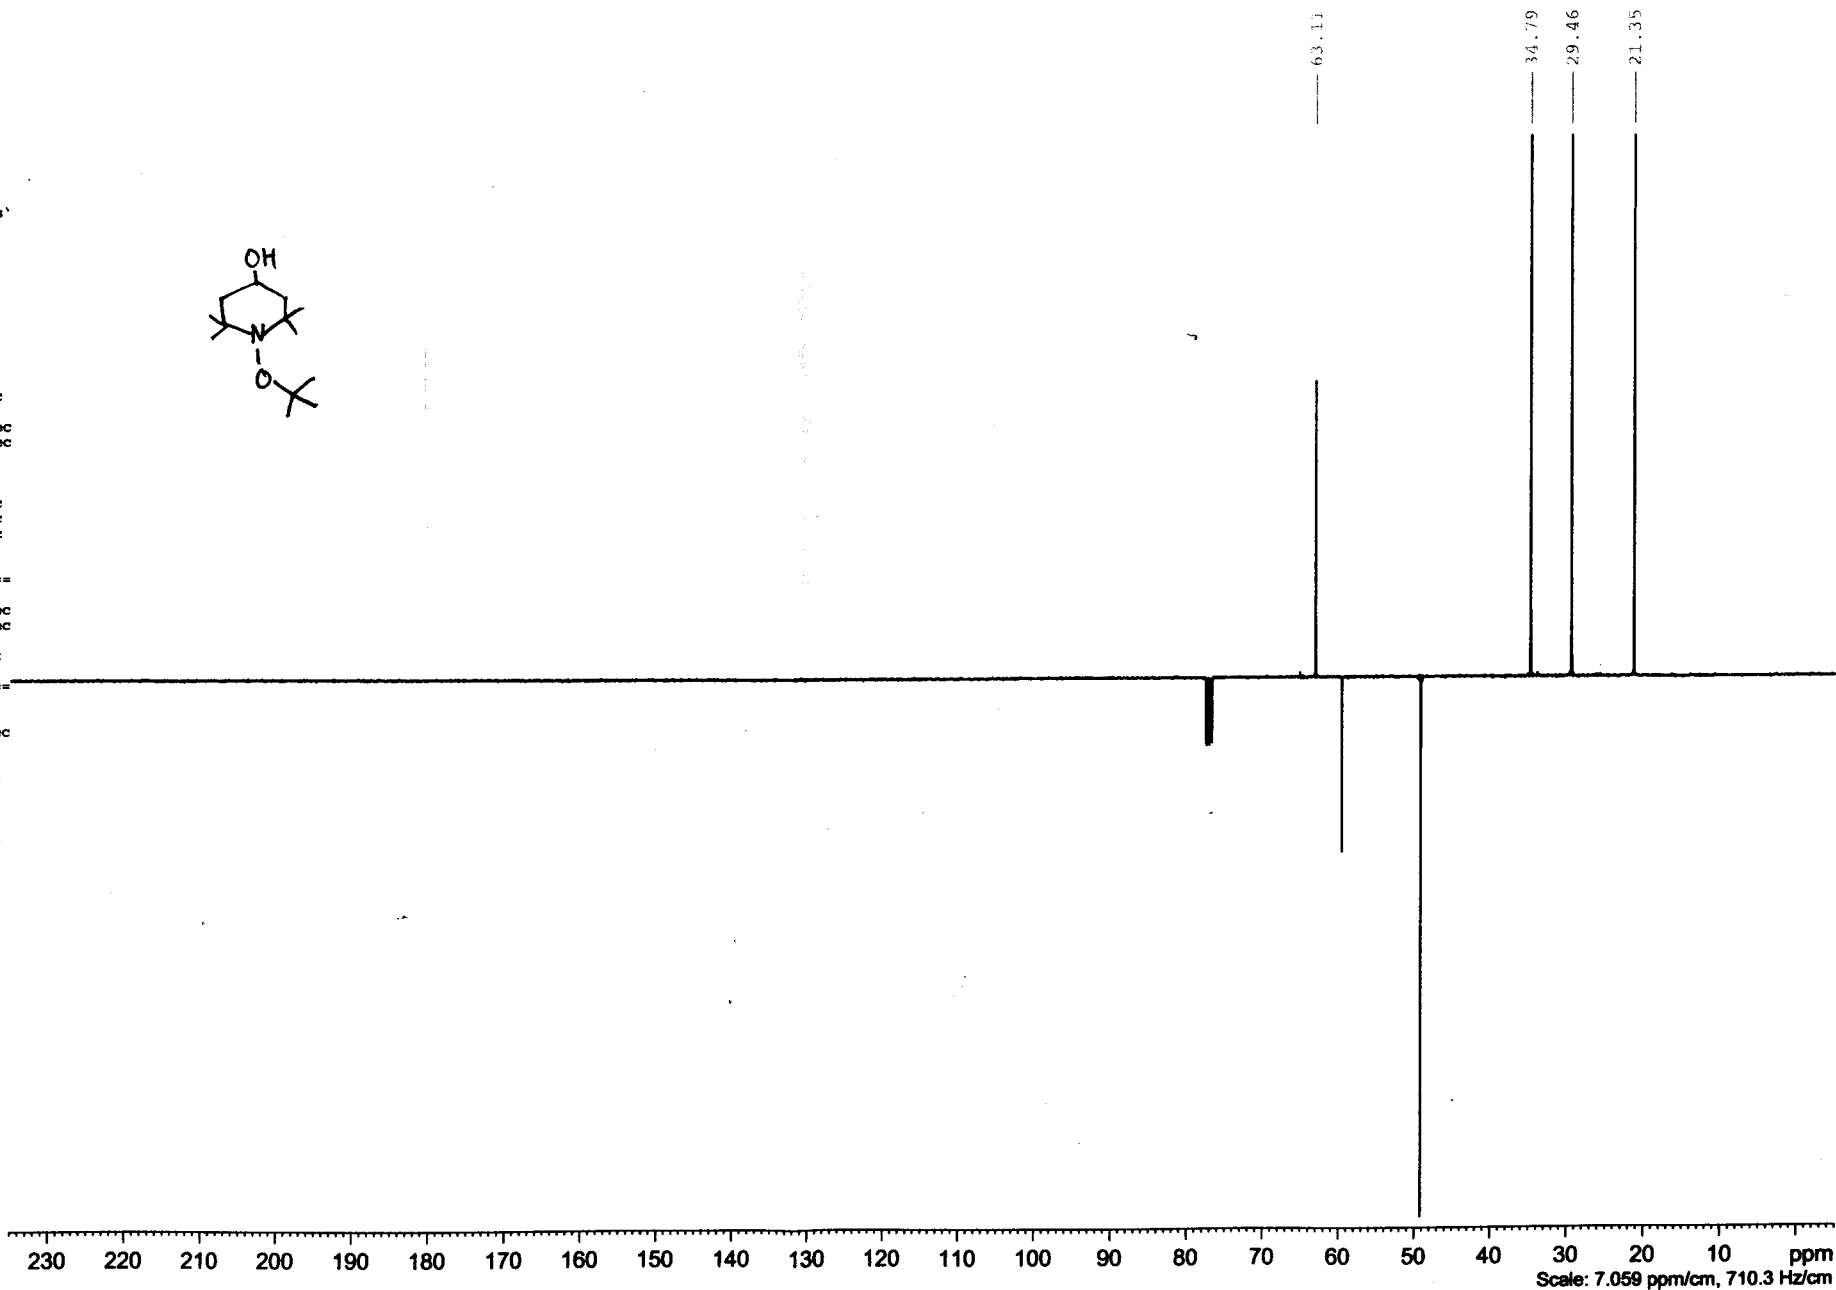

Bruker dpx 400

Current Data Parameters  
NAME 20070711-400-4  
EXPNO 10  
PROCNO 1

F2 - Acquisition Parameters  
Date\_ 20070711  
Time 9.24  
INSTRUM spect  
PROBHD 5 mm QNP 1H/15  
PULPROG zg30  
TD 65536  
SOLVENT CDCl3  
NS 16  
DS 2  
SWH 8223.685 Hz  
FIDRES 0.125483 Hz  
AQ 3.9846387 sec  
RG 128  
DW 60.800 usec  
DE 7.50 usec  
TE 293.8 K  
D1 1.00000000 sec  
TD0 1

===== CHANNEL f1 =====  
NUC1 1H  
P1 8.20 usec  
PL1 -4.00 dB  
SFO1 400.1324008 MHz

F2 - Processing parameters  
SI 32768  
SF 400.1300071 MHz  
WDW EM  
SSB 0  
LB 0.30 Hz  
GB 0  
PC 1.00

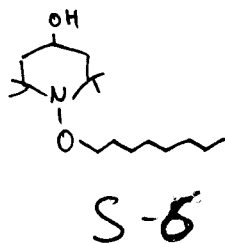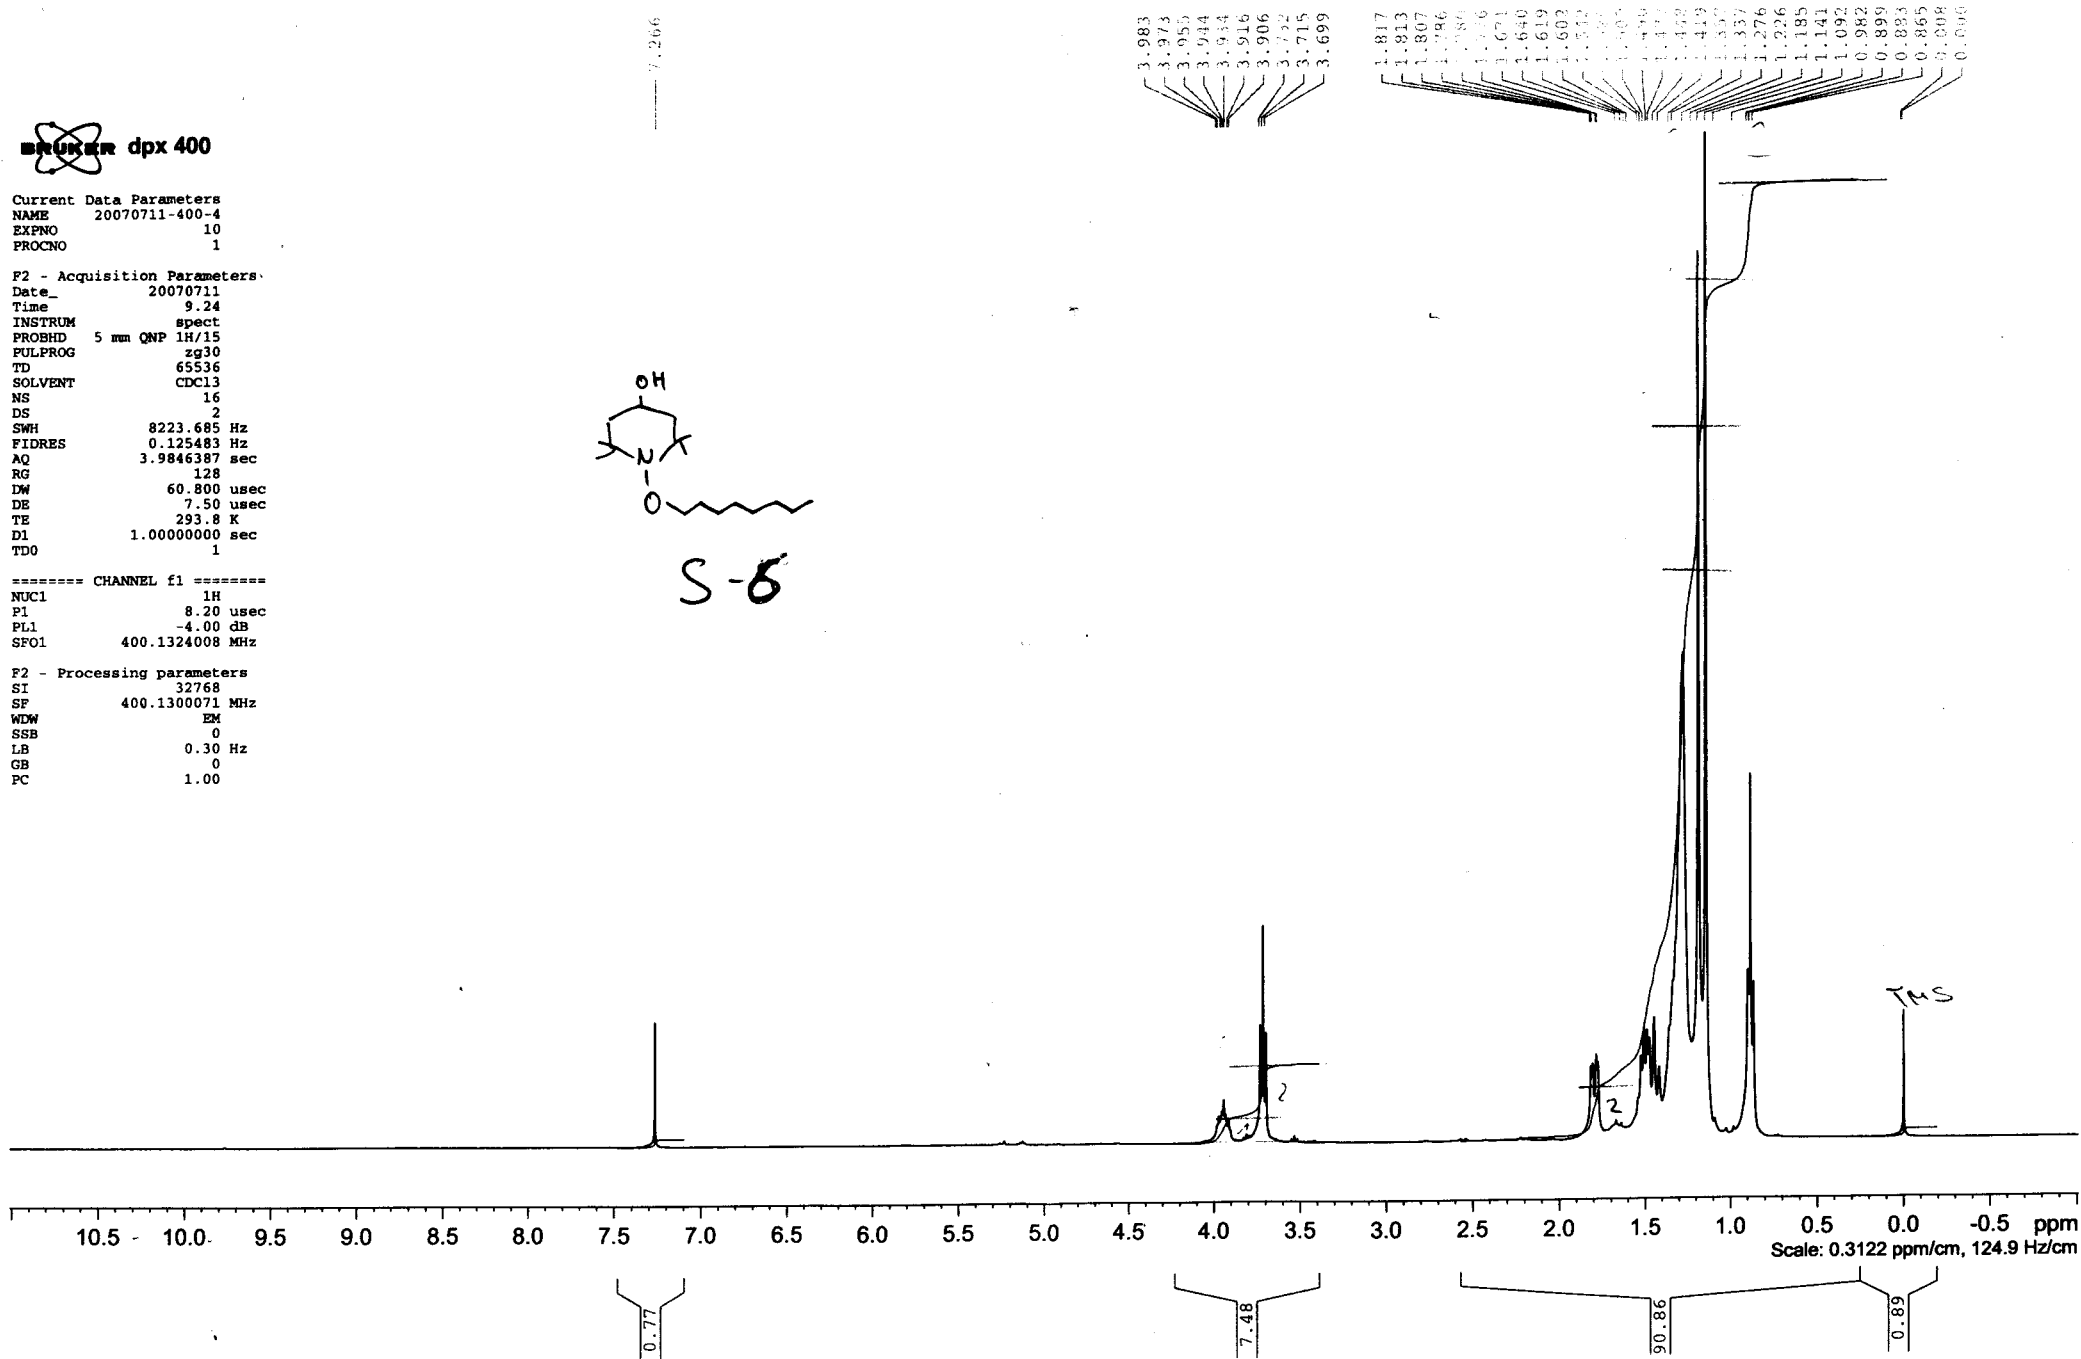

Current Data Parameters  
NAME 20070711-400-25  
EXPNO 11  
PROCNO 1

F2 - Acquisition Parameters  
Date\_ 20070711  
Time 22.17  
INSTRUM spect  
PROBHD 5 mm QNP 1H/15  
PULPROG jmod  
TD 65536  
SOLVENT CDC13  
NS 1024  
DS 4  
SWH 26315.789 Hz  
FIDRES 0.401547 Hz  
AQ 1.2452340 sec  
RG 512  
DW 19.000 usec  
DE 10.00 usec  
TE 294.2 K  
CNST2 145.0000000  
CNST11 1.0000000  
D1 2.00000000 sec  
d20 0.00689655 sec  
DELTA 0.00000891 sec  
TD0 1

===== CHANNEL f1 =====  
NUC1 13C  
P1 7.00 usec  
p2 14.00 usec  
PL1 -3.50 dB  
SFO1 100.6248421 MHz

===== CHANNEL f2 =====  
CPDPRG2 waltz16  
NUC2 1H  
PCPD2 100.00 usec  
PL2 -4.00 dB  
PL12 21.00 dB  
SFO2 400.1316005 MHz

F2 - Processing parameters  
SI 32768  
SF 100.6127690 MHz  
WDW EM  
SSB 0  
LB 1.00 Hz  
GB 0  
PC 1.40

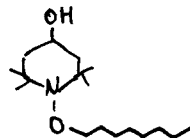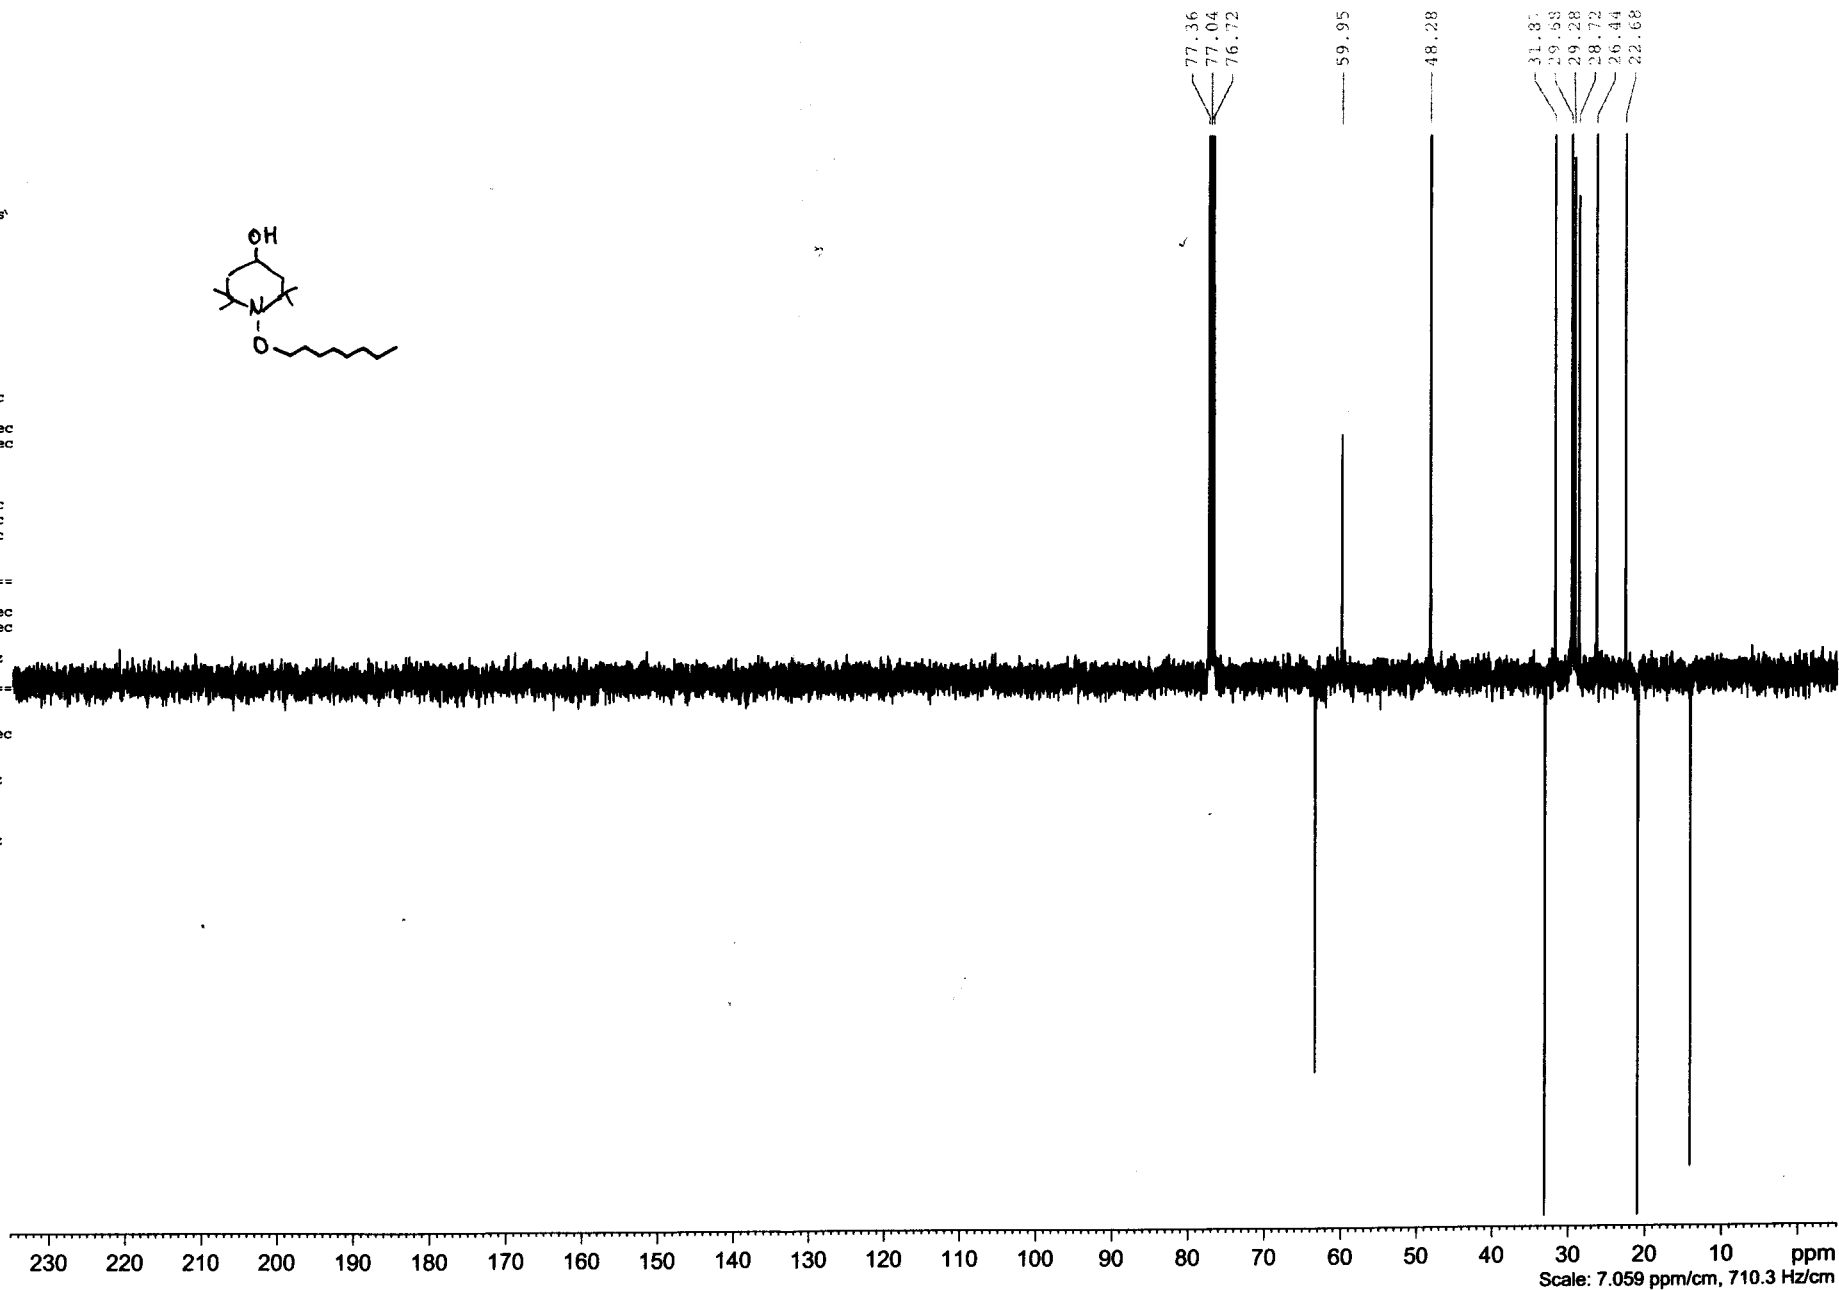

p31

Current Data Parameters  
NAME 20070308-400-45  
EXPNO 10  
PROCNO 1

F2 - Acquisition Parameters  
Date\_ 20070308  
Time 16.12  
INSTRUM dpx400  
PROBHD 5 mm QNP 1H/15  
PULPROG zg30  
TD 65536  
SOLVENT CDC13  
NS 16  
DS 2  
SWH 8223.685 Hz  
FIDRES 0.125483 Hz  
AQ 3.9846387 sec  
RG 57  
DW 60.800 usec  
DE 7.50 usec  
TE 296.4 K  
D1 1.00000000 sec  
TD0 1

===== CHANNEL f1 =====  
NUC1 1H  
P1 8.20 usec  
PL1 -4.00 dB  
SFO1 400.1324008 MHz

F2 - Processing parameters  
SI 32768  
SF 400.1300057 MHz  
WDW EM  
SSB 0  
LB 0.30 Hz  
GB 0  
PC 1.00

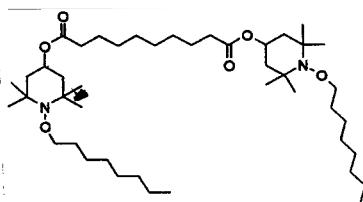

S-7

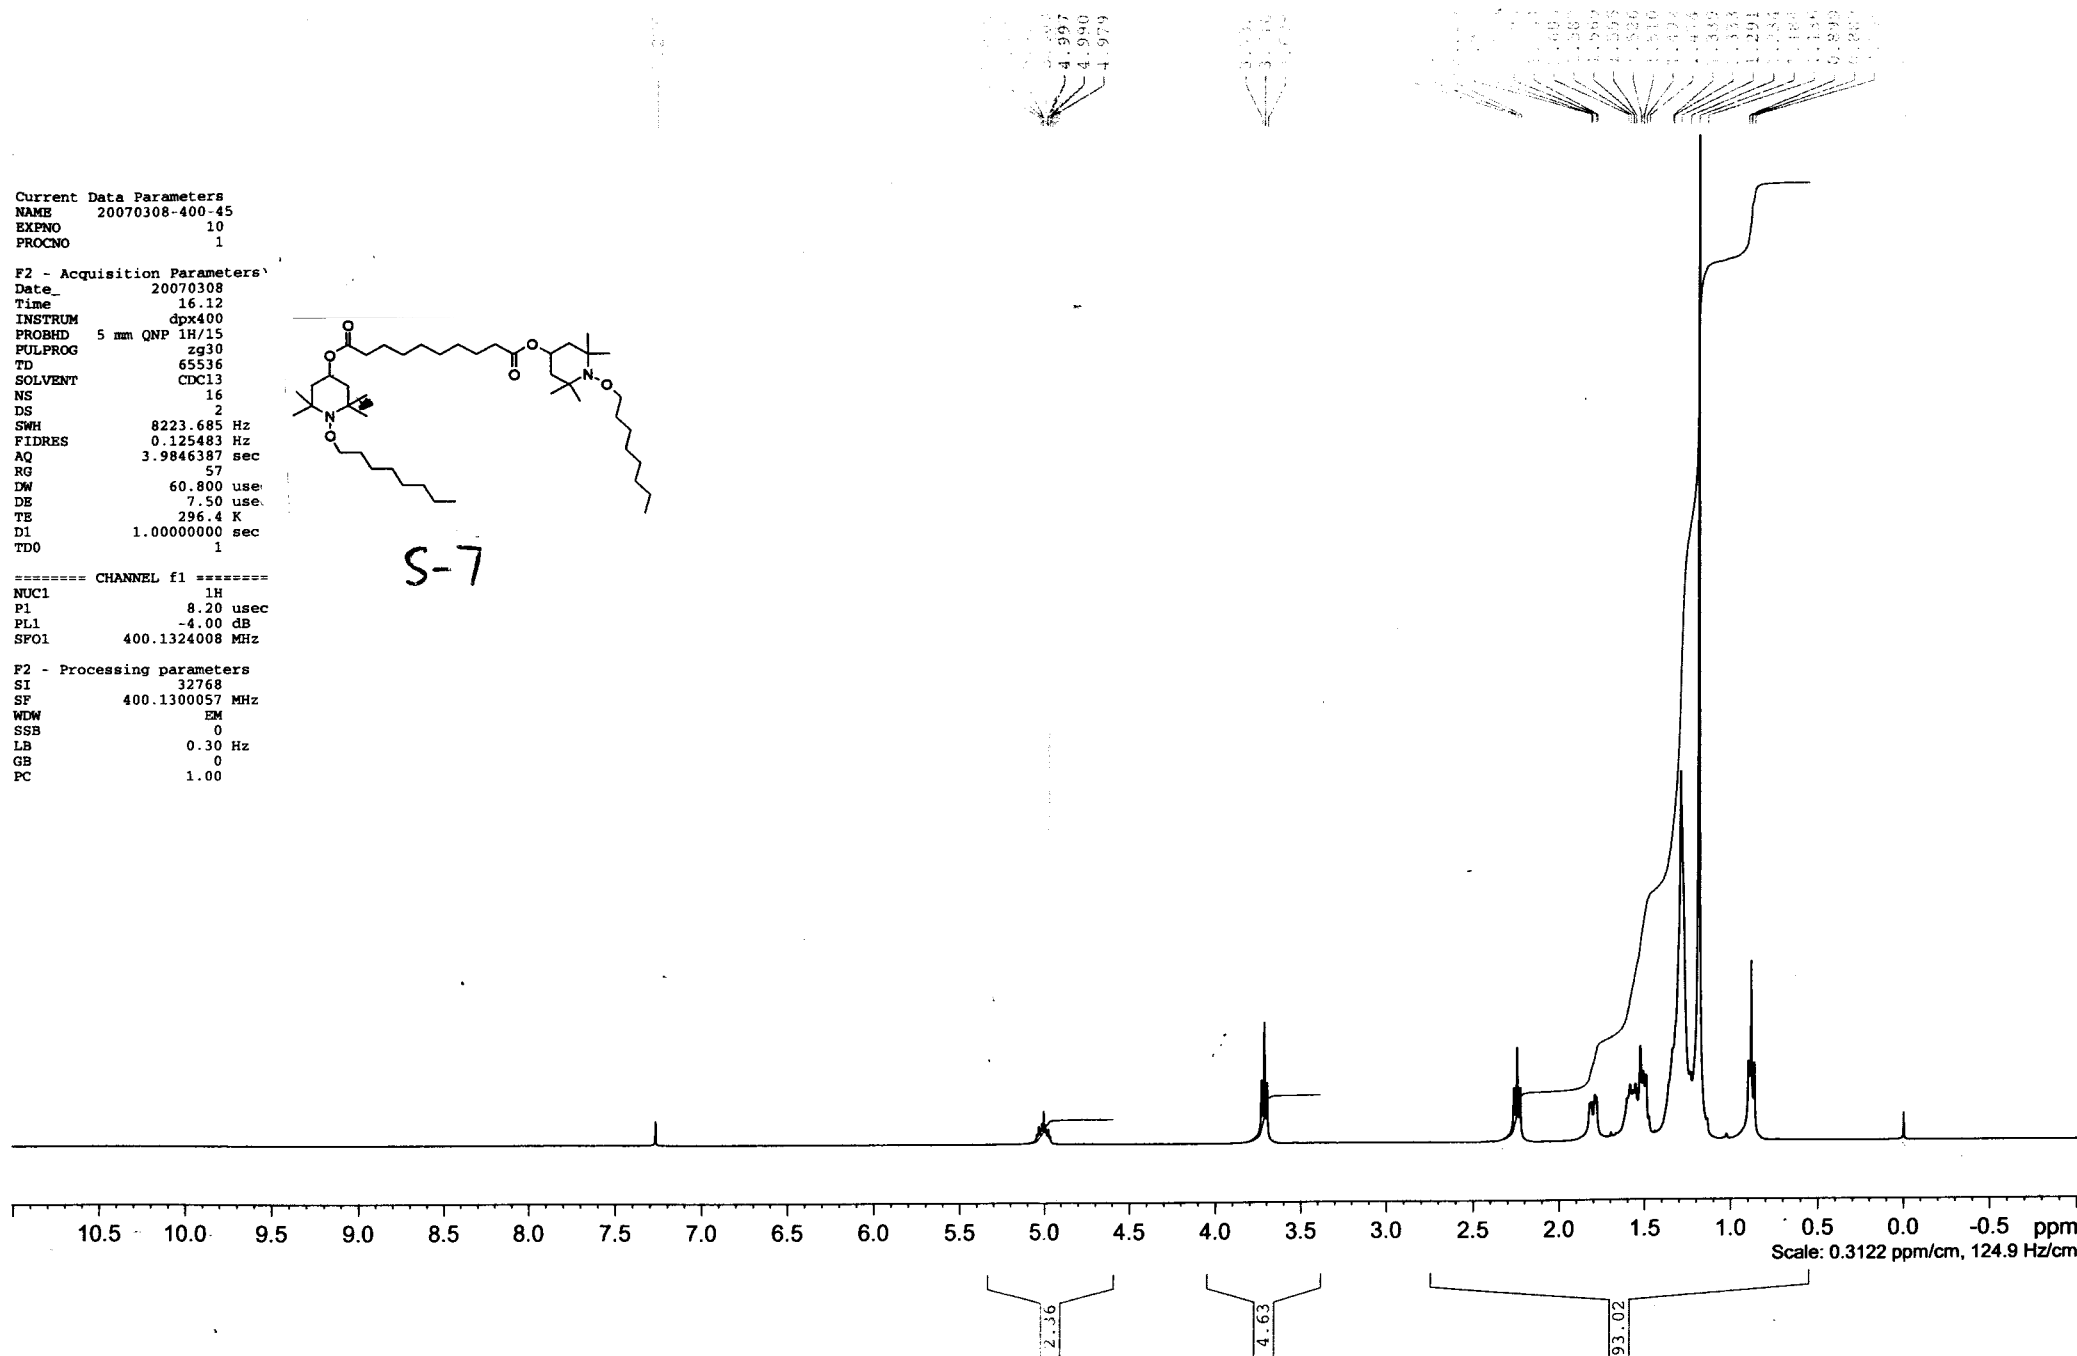

Current Data Parameters  
 NAME 20070308-400-45  
 EXPNO 11  
 PROCNO 1

F2 - Acquisition Parameters  
 Date\_ 20070309  
 Time 0.02  
 INSTRUM dpx400  
 PROBHD 5 mm QNP 1H/15  
 PULPROG jmod  
 TD 65536  
 SOLVENT CDCl3  
 NS 1024  
 DS 4  
 SWH 26315.789 Hz  
 FIDRES 0.401547 Hz  
 AQ 1.2452340 sec  
 RG 512  
 DW 19.000 usec  
 DE 10.00 usec  
 TE 294.9 K  
 CNST2 145.0000000  
 CNST11 1.0000000  
 D1 2.00000000 sec  
 d20 0.00689655 sec  
 DELTA 0.00000891 sec  
 TD0 1

===== CHANNEL f1 =====  
 NUC1 13C  
 P1 7.00 usec  
 p2 14.00 usec  
 PL1 -3.50 dB  
 SFO1 100.6248421 MHz

===== CHANNEL f2 =====  
 CPDPRG2 waltz16  
 NUC2 1H  
 PCPD2 100.00 usec  
 PL2 -4.00 dB  
 PL12 21.00 dB  
 SFO2 400.1316005 MHz

F2 - Processing parameters  
 SI 32768  
 SF 100.6127690 MHz  
 WDW EM  
 SSB 0  
 LB 1.00 Hz  
 GB 0  
 PC 1.40

S-7

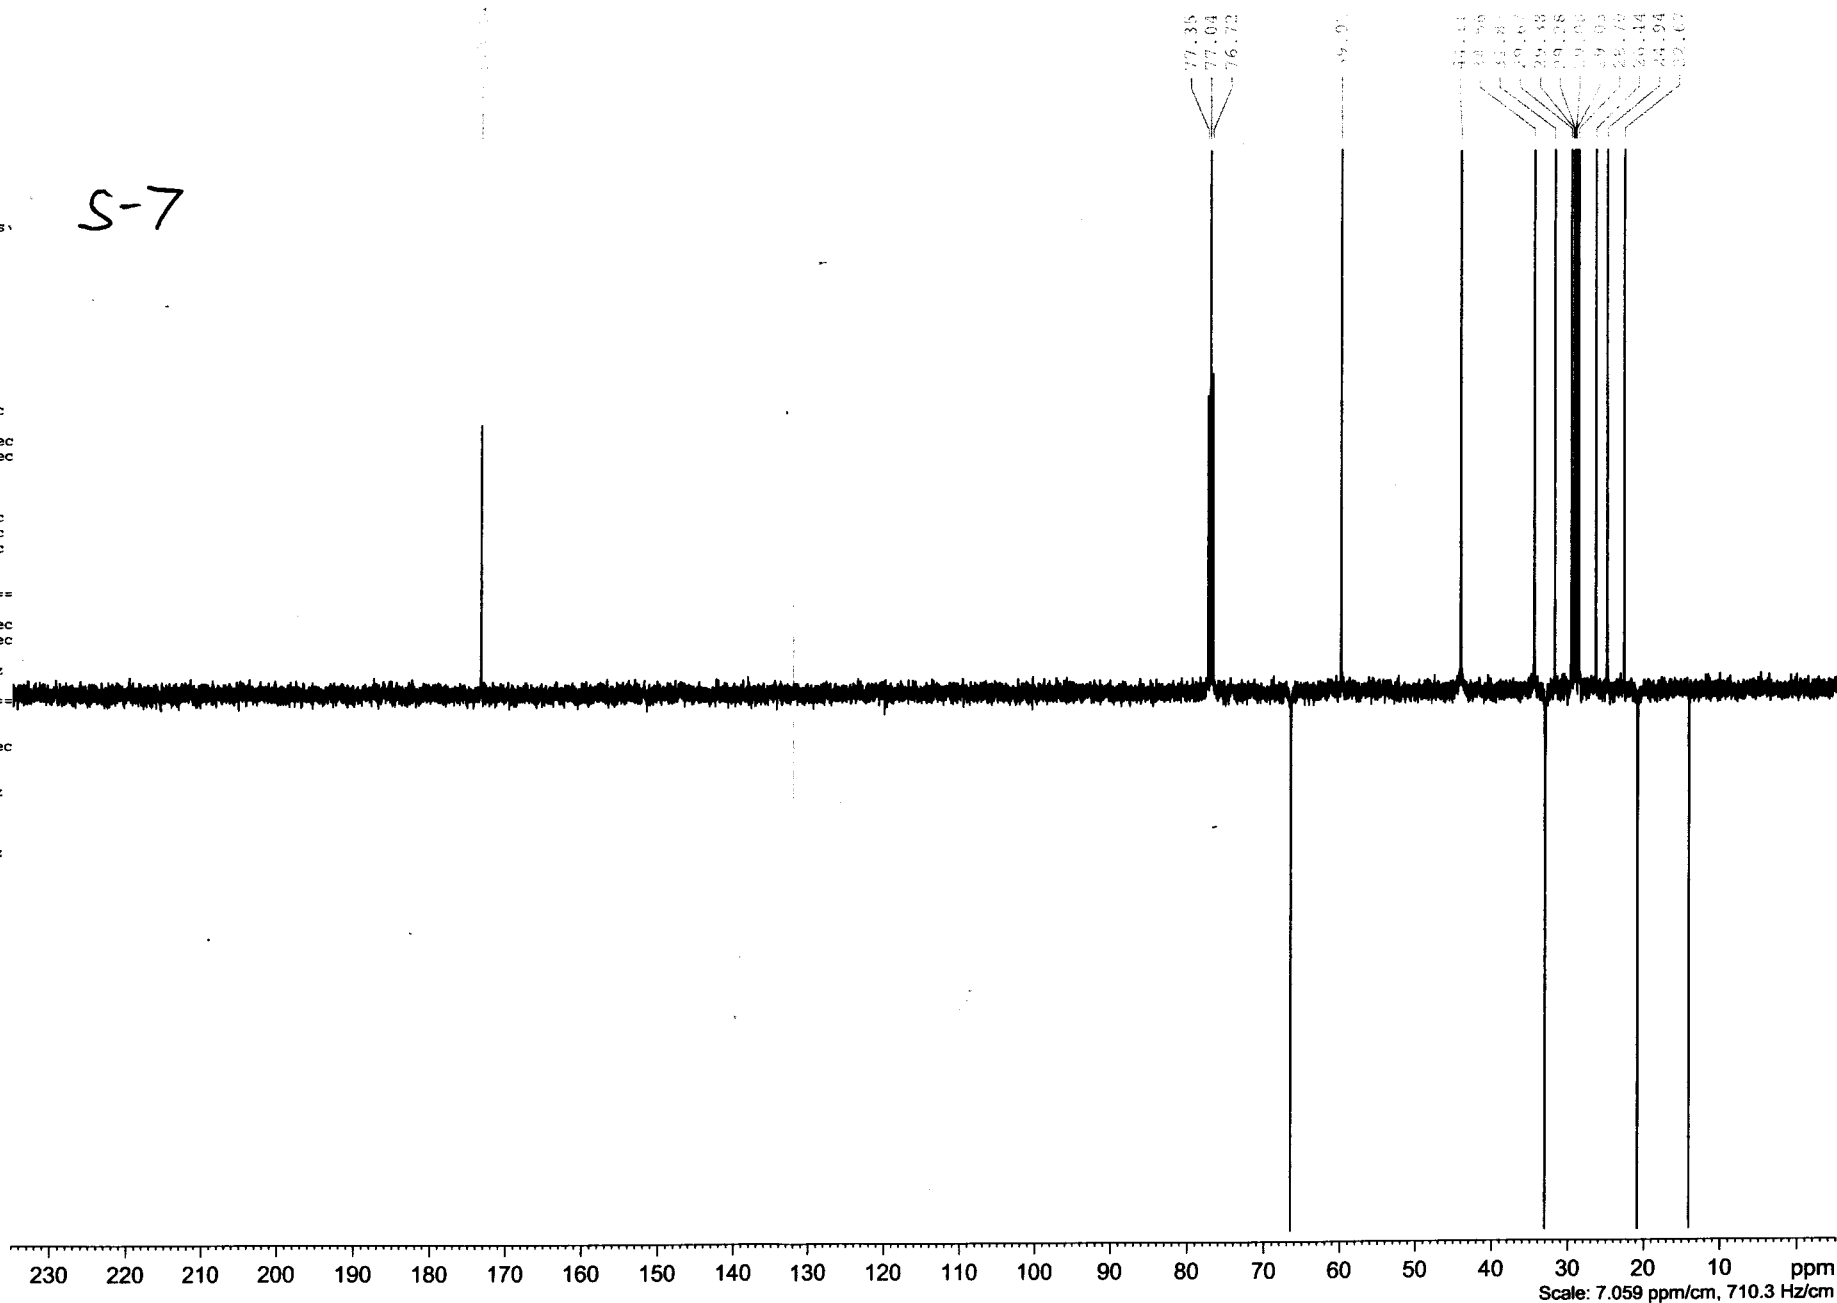

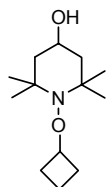**<sup>1</sup>H-NMR:****S-8: 1-Cyclobutoxy-2,2,6,6-tetramethyl-piperidin-4-ol**

| Parameter              | Value          |
|------------------------|----------------|
| Acquisition Time (sec) | 1.9923         |
| Frequency (MHz)        | 400.13         |
| Nucleus                | <sup>1</sup> H |
| Number of Transients   | 16             |
| Original Points Count  | 32768          |
| Points Count           | 32768          |
| Pulse Sequence         | zg30           |
| Solvent                | CHLOROFORM-D   |
| Sweep Width (Hz)       | 8223.68        |
| Temperature (degree C) | 21.900         |

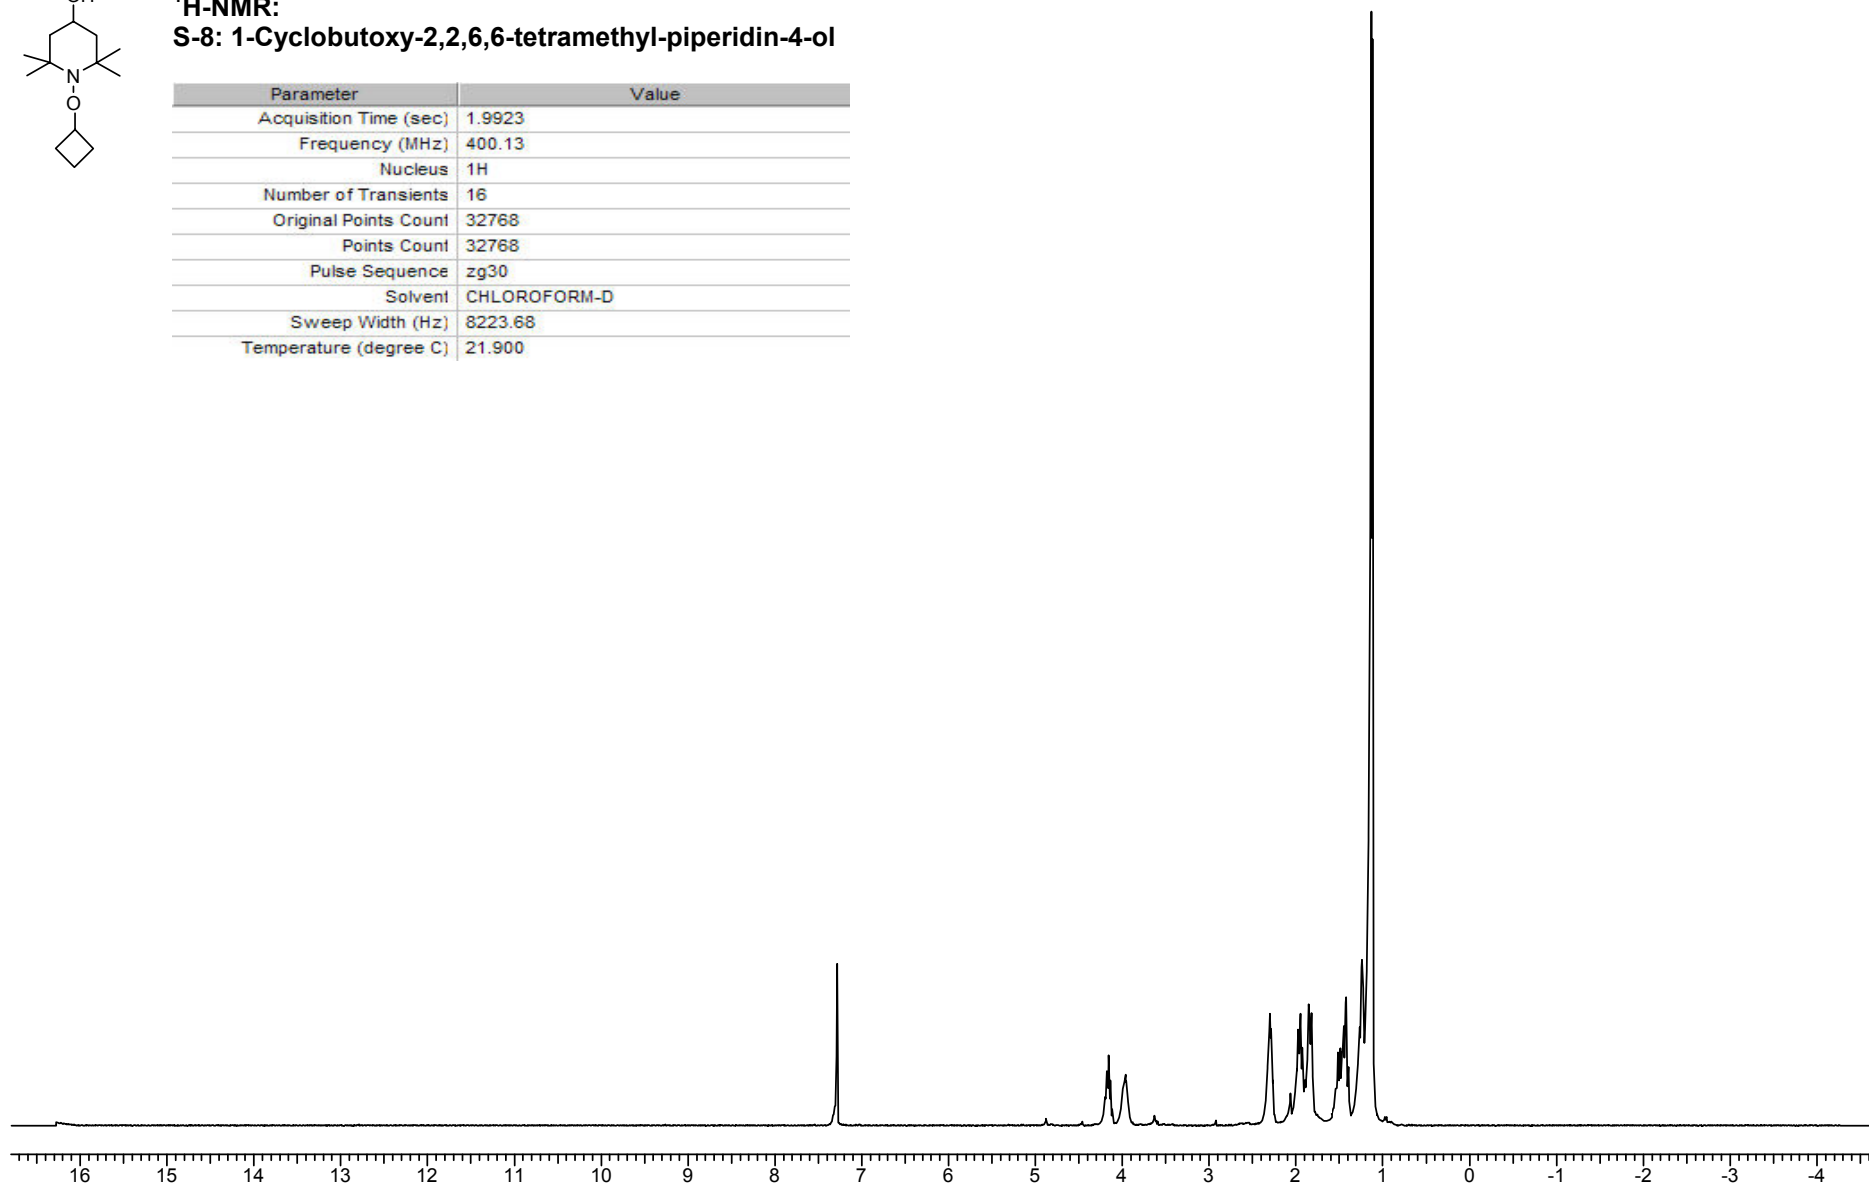

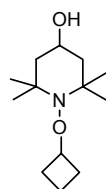**<sup>13</sup>C-NMR****S-8: 1-Cyclobutoxy-2,2,6,6-tetramethyl-piperidin-4-ol**

| Parameter              | Value           |
|------------------------|-----------------|
| Acquisition Time (sec) | 0.6226          |
| Frequency (MHz)        | 100.61          |
| Nucleus                | <sup>13</sup> C |
| Number of Transients   | 256             |
| Original Points Count  | 32768           |
| Points Count           | 32768           |
| Pulse Sequence         | zgpg30          |
| Solvent                | CHLOROFORM-D    |
| Sweep Width (Hz)       | 26315.79        |
| Temperature (degree C) | 21.400          |

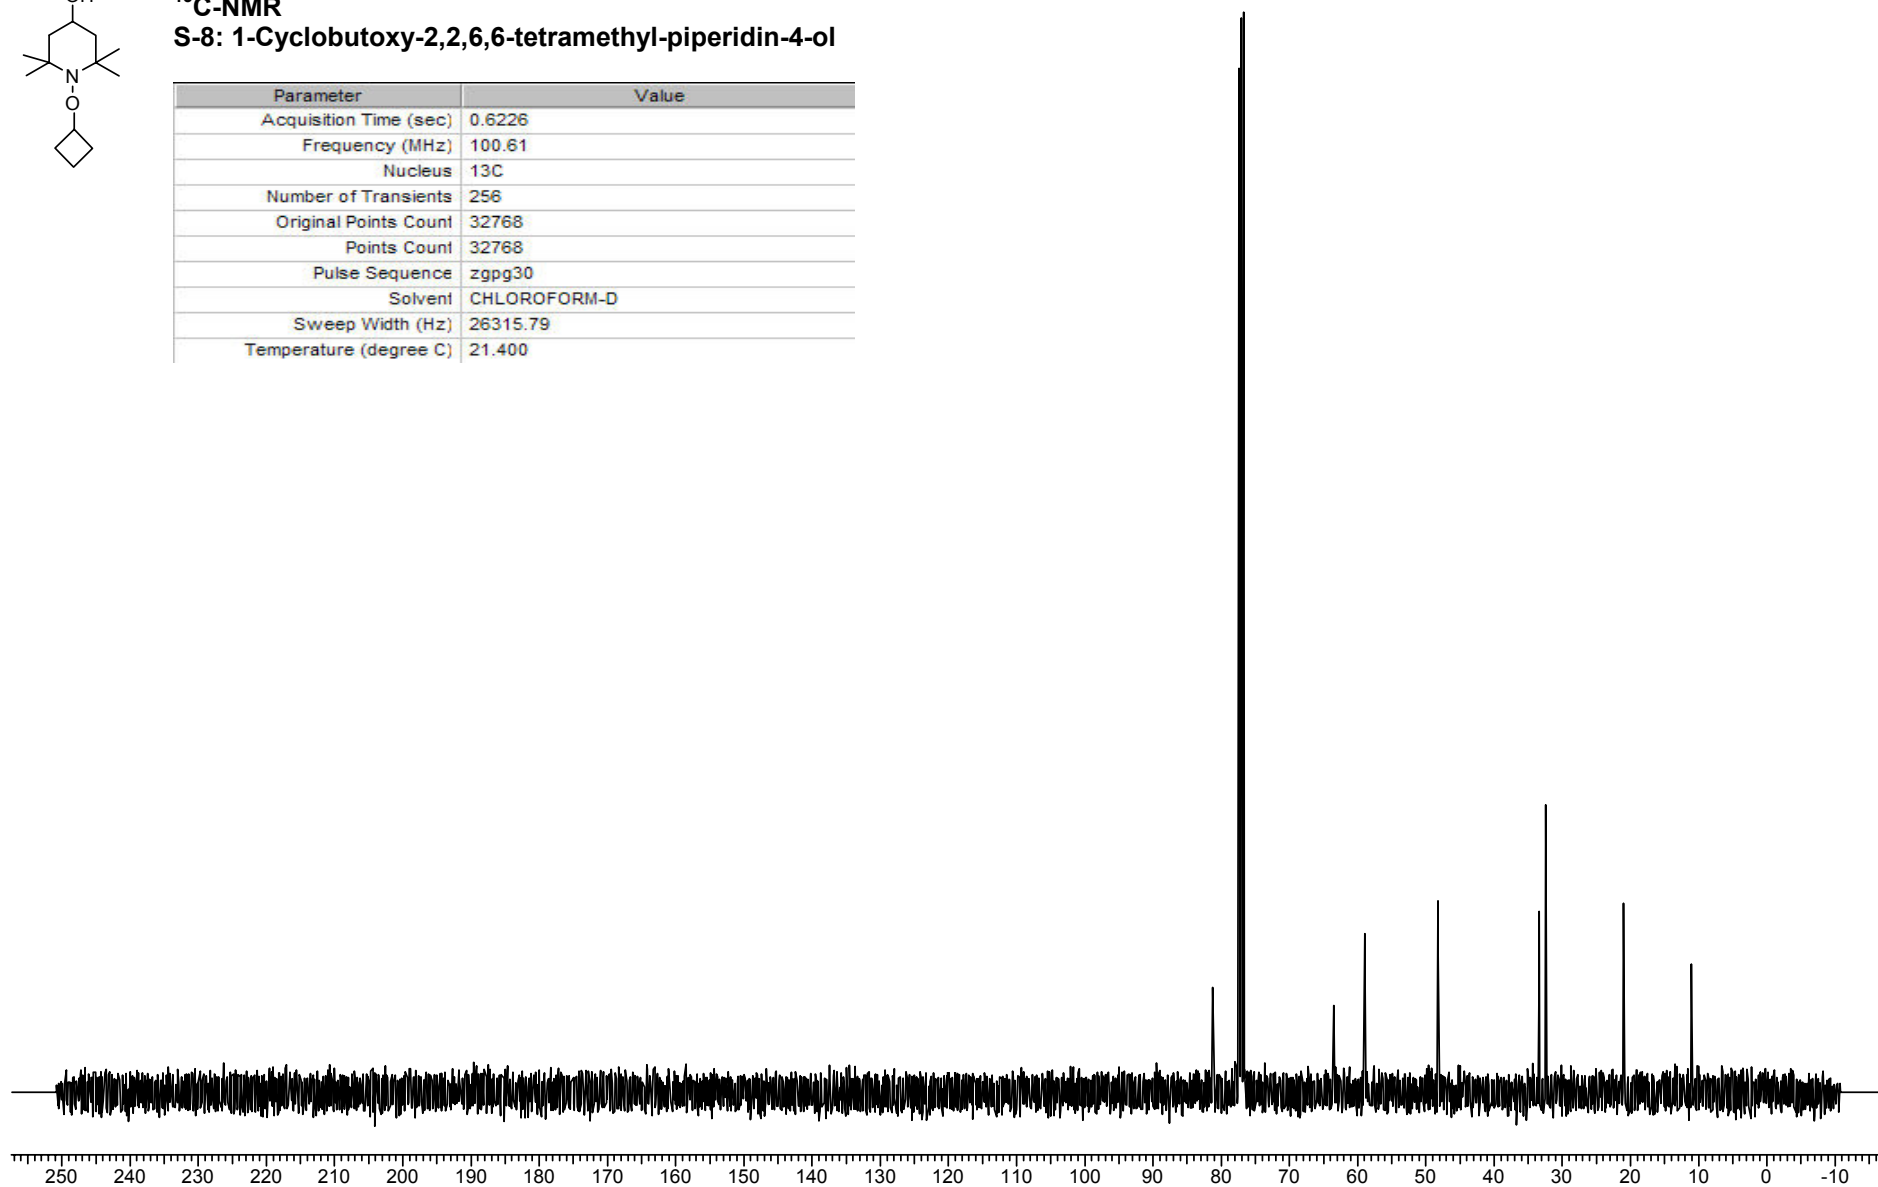

p35

7.285

**BRUKER  
BIOSPIN**

Current Data Parameters  
NAME 20060328-4-26  
EXPNO 1  
PROCNO 1

F2 - Acquisition Parameters  
Date\_ 20060328  
Time 17.27  
INSTRUM dpx400  
PROBHD 5 mm QNP 1H/15  
PULPROG zg30  
TD 65536  
SOLVENT CDC13  
NS 16  
DS 2  
SWH 8223.685 Hz  
FIDRES 0.125483 Hz  
AQ 3.9846387 sec  
RG 40.3  
DW 60.800 usec  
DE 7.50 usec  
TE 297.0 K  
DL 1.00000000 sec  
MCREST 0.00000000 sec  
MCWRK 0.01500000 sec

===== CHANNEL f1 =====  
NUC1 1H  
P1 8.20 usec  
PL1 -2.00 dB  
SF01 400.1324008 MHz

F2 - Processing parameters  
SI 32768  
SF 400.1300000 MHz  
WDW EM  
SSB 0  
LB 0.30 Hz  
GB 0  
PC 1.00

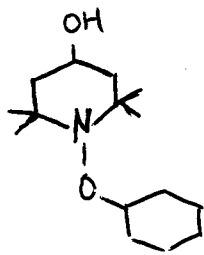

S-9

3.960  
3.615  
3.609  
3.600

2.050  
1.827  
1.817  
1.796  
1.791  
1.752  
1.550  
1.499  
1.471  
1.441  
1.308  
1.218  
1.198  
1.153  
1.130

0.009

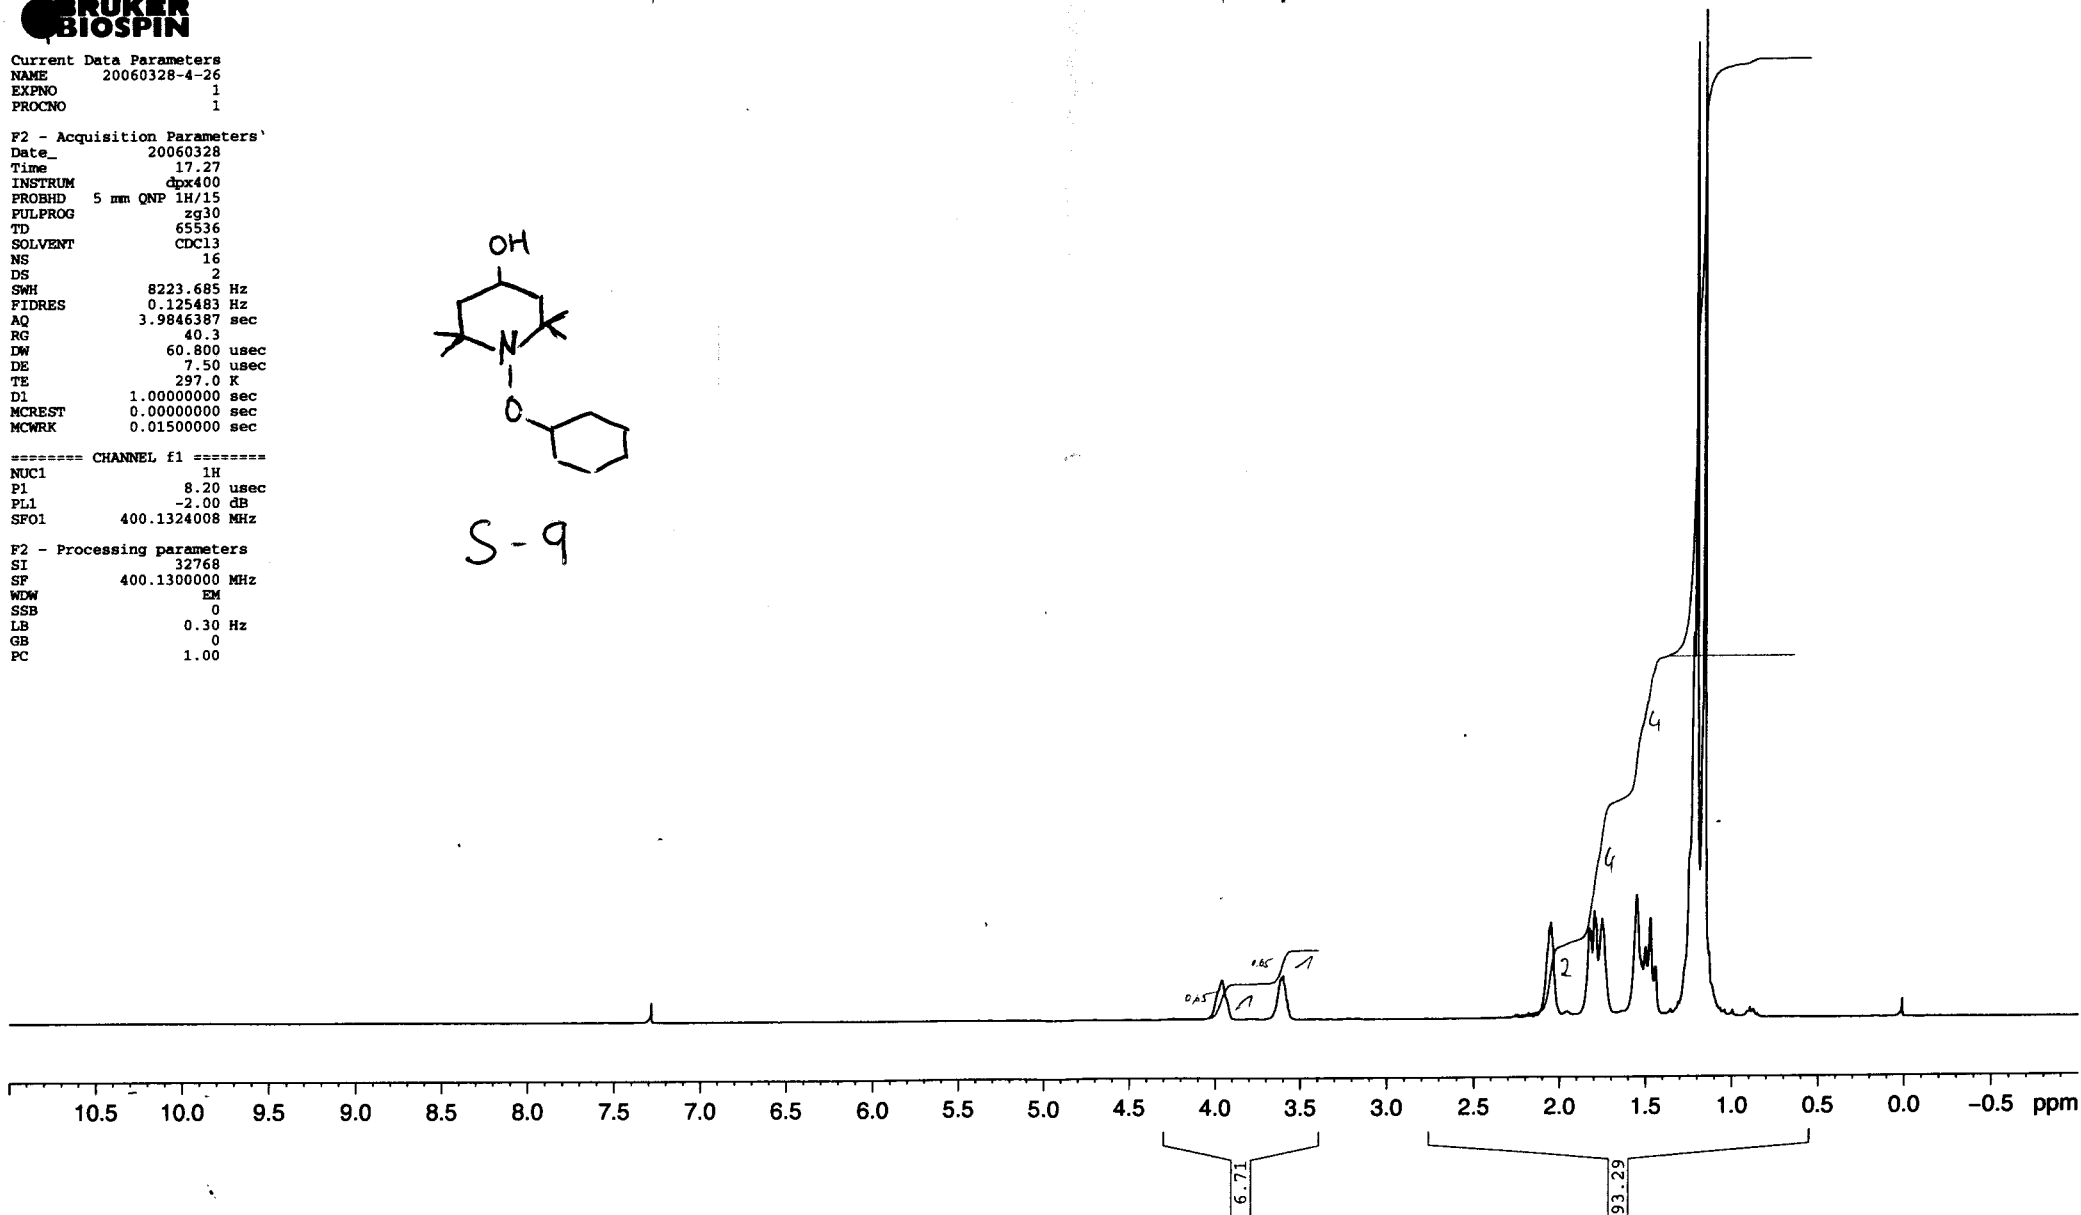

AD\_C13PD2k CDCl3 x

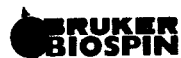

Current Data Parameters  
NAME 20060328-4-26  
EXPNO 2  
PROCNO 1

F2 - Acquisition Parameters  
Date\_ 20060329  
Time 3.02  
INSTRUM dpx400  
PROBHD 5 mm QNP 1H/15  
PULPROG zgpg30  
TD 65536  
SOLVENT CDCl3  
NS 2048  
DS 4  
SWH 26315.789 Hz  
FIDRES 0.401547 Hz  
AQ 1.2452340 sec  
RG 5160.6  
DW 19.000 usec  
DE 10.00 usec  
TE 297.0 K  
D1 2.00000000 sec  
d11 0.03000000 sec  
MCREST 0.00000000 sec  
MCWRK 0.01500000 sec

===== CHANNEL f1 =====  
NUC1 13C  
P1 6.10 usec  
PL1 -2.00 dB  
SFO1 100.6248421 MHz

===== CHANNEL f2 =====  
CPDPRG2 waltz16  
NUC2 1H  
PCPD2 80.00 usec  
PL2 -2.00 dB  
PL12 20.00 dB  
PL13 23.00 dB  
SFO2 400.1316005 MHz

F2 - Processing parameters  
SI 32768  
SF 100.6127690 MHz  
WDW EM  
SSB 0  
LB 1.00 Hz  
GB 0  
PC 1.40

S-9

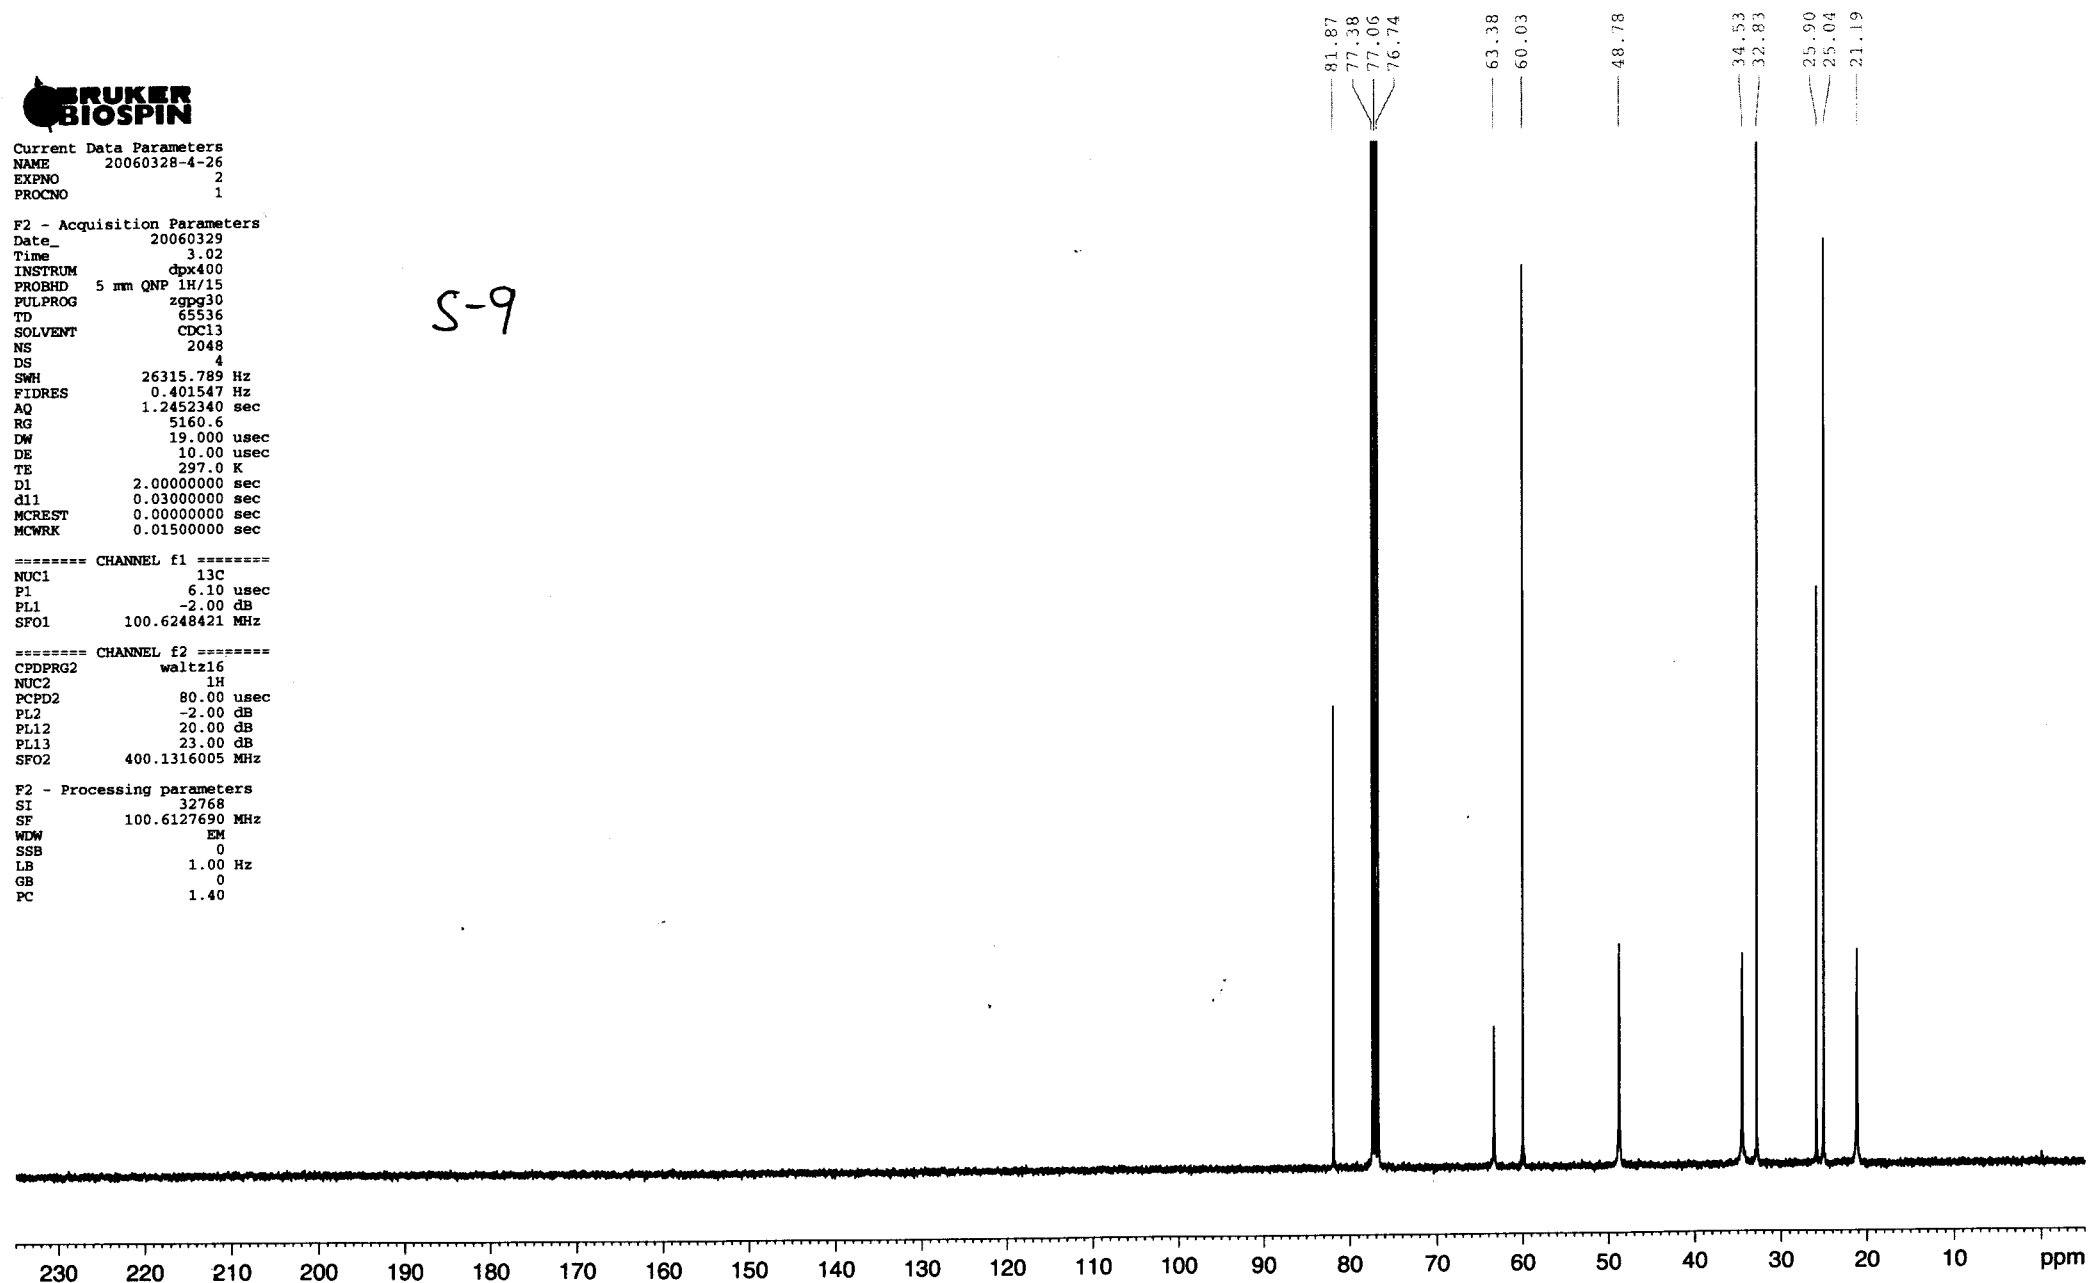

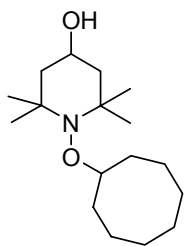**<sup>1</sup>H-NMR****S-10: 1-Cyclooctyloxy-2,2,6,6-tetramethyl-piperidin-4-ol**

| Parameter              | Value          |
|------------------------|----------------|
| Acquisition Time (sec) | 2.6542         |
| Frequency (MHz)        | 300.13         |
| Nucleus                | <sup>1</sup> H |
| Number of Transients   | 16             |
| Original Points Count  | 32768          |
| Points Count           | 32768          |
| Pulse Sequence         | zg30           |
| Solvent                | CHLOROFORM-D   |
| Sweep Width (Hz)       | 6172.84        |
| Temperature (degree C) | 27.000         |

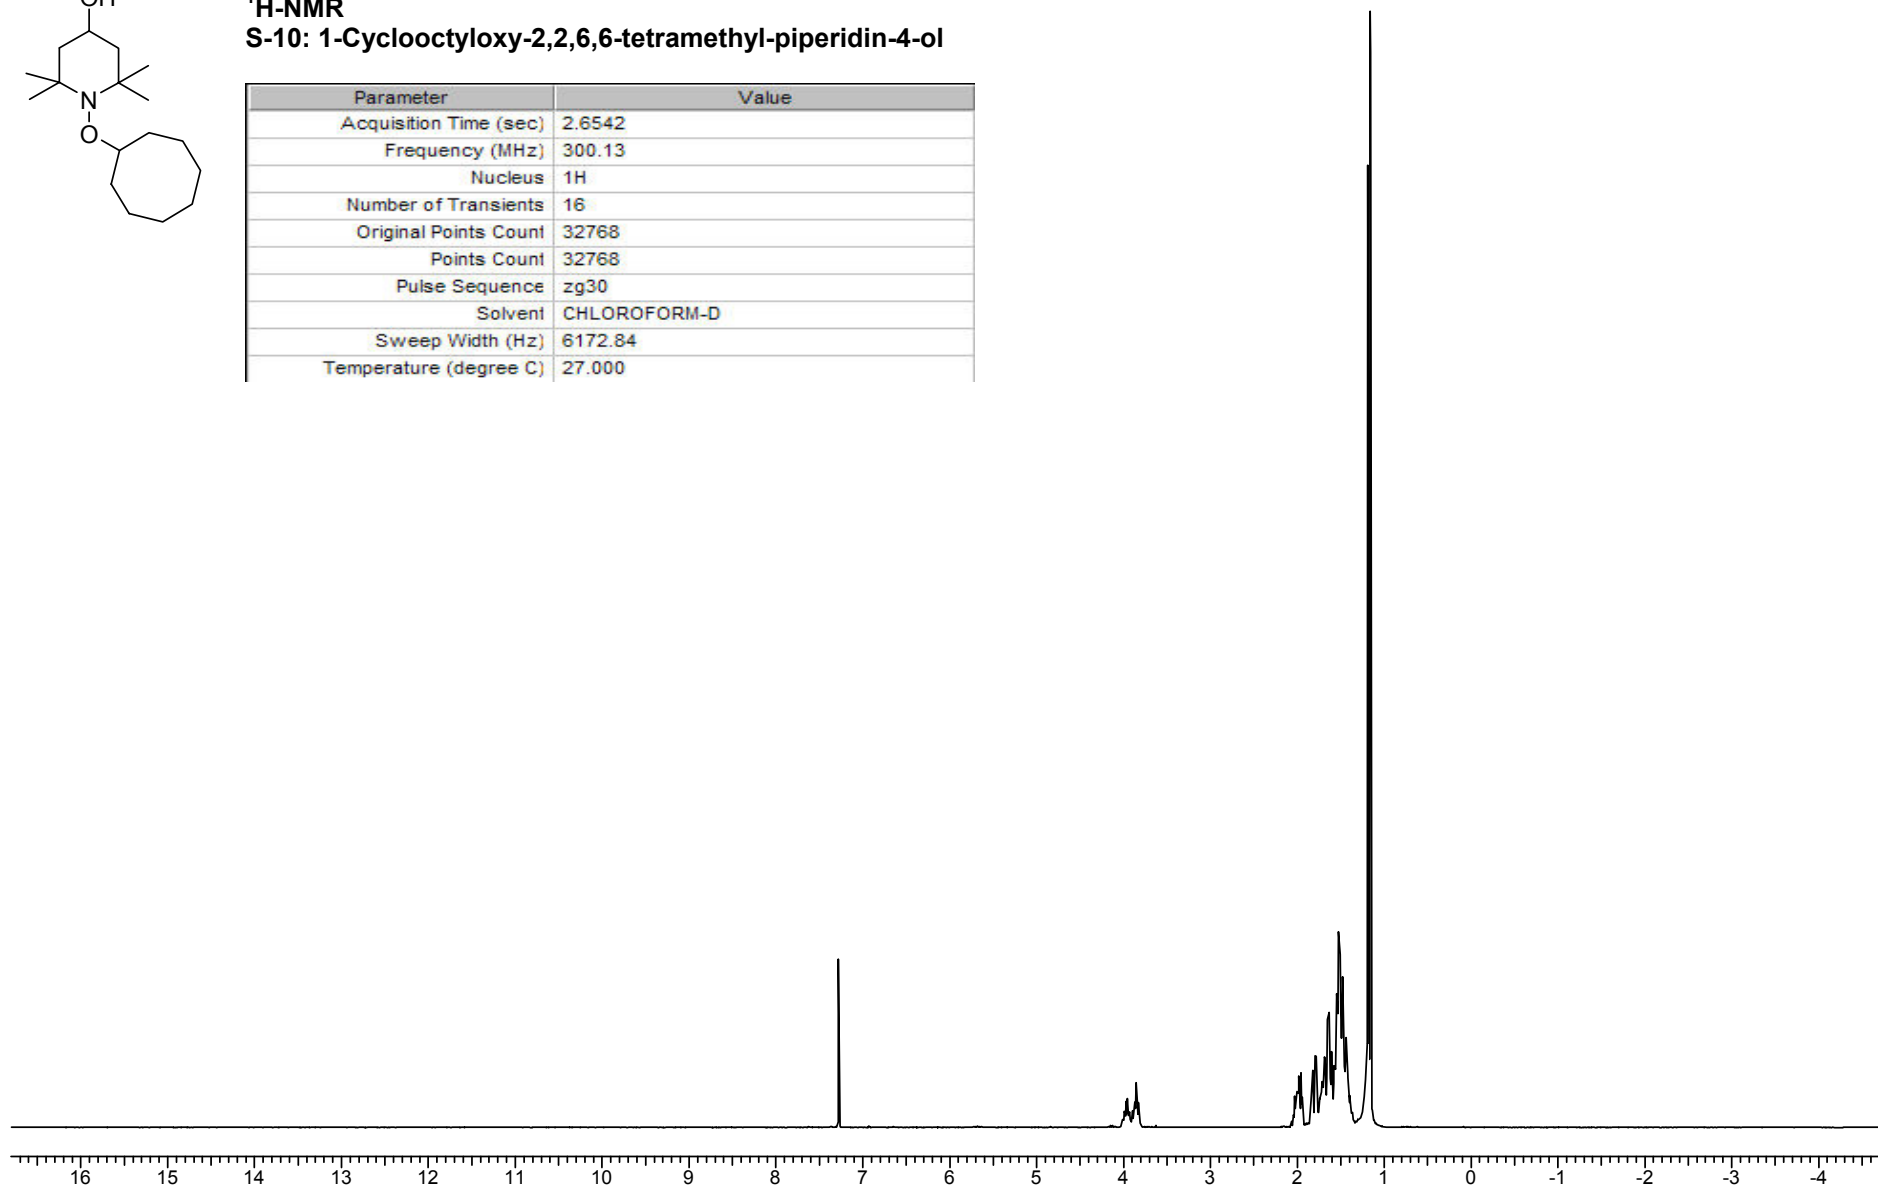

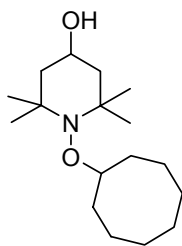**<sup>13</sup>C-NMR****S-10: 1-Cyclooctyloxy-2,2,6,6-tetramethyl-piperidin-4-ol**

| Parameter              | Value           |
|------------------------|-----------------|
| Acquisition Time (sec) | 0.8307          |
| Frequency (MHz)        | 75.47           |
| Nucleus                | <sup>13</sup> C |
| Number of Transients   | 1024            |
| Original Points Count  | 32768           |
| Points Count           | 32768           |
| Pulse Sequence         | zgpg30          |
| Solvent                | CHLOROFORM-D    |
| Sweep Width (Hz)       | 19723.87        |
| Temperature (degree C) | 27.000          |

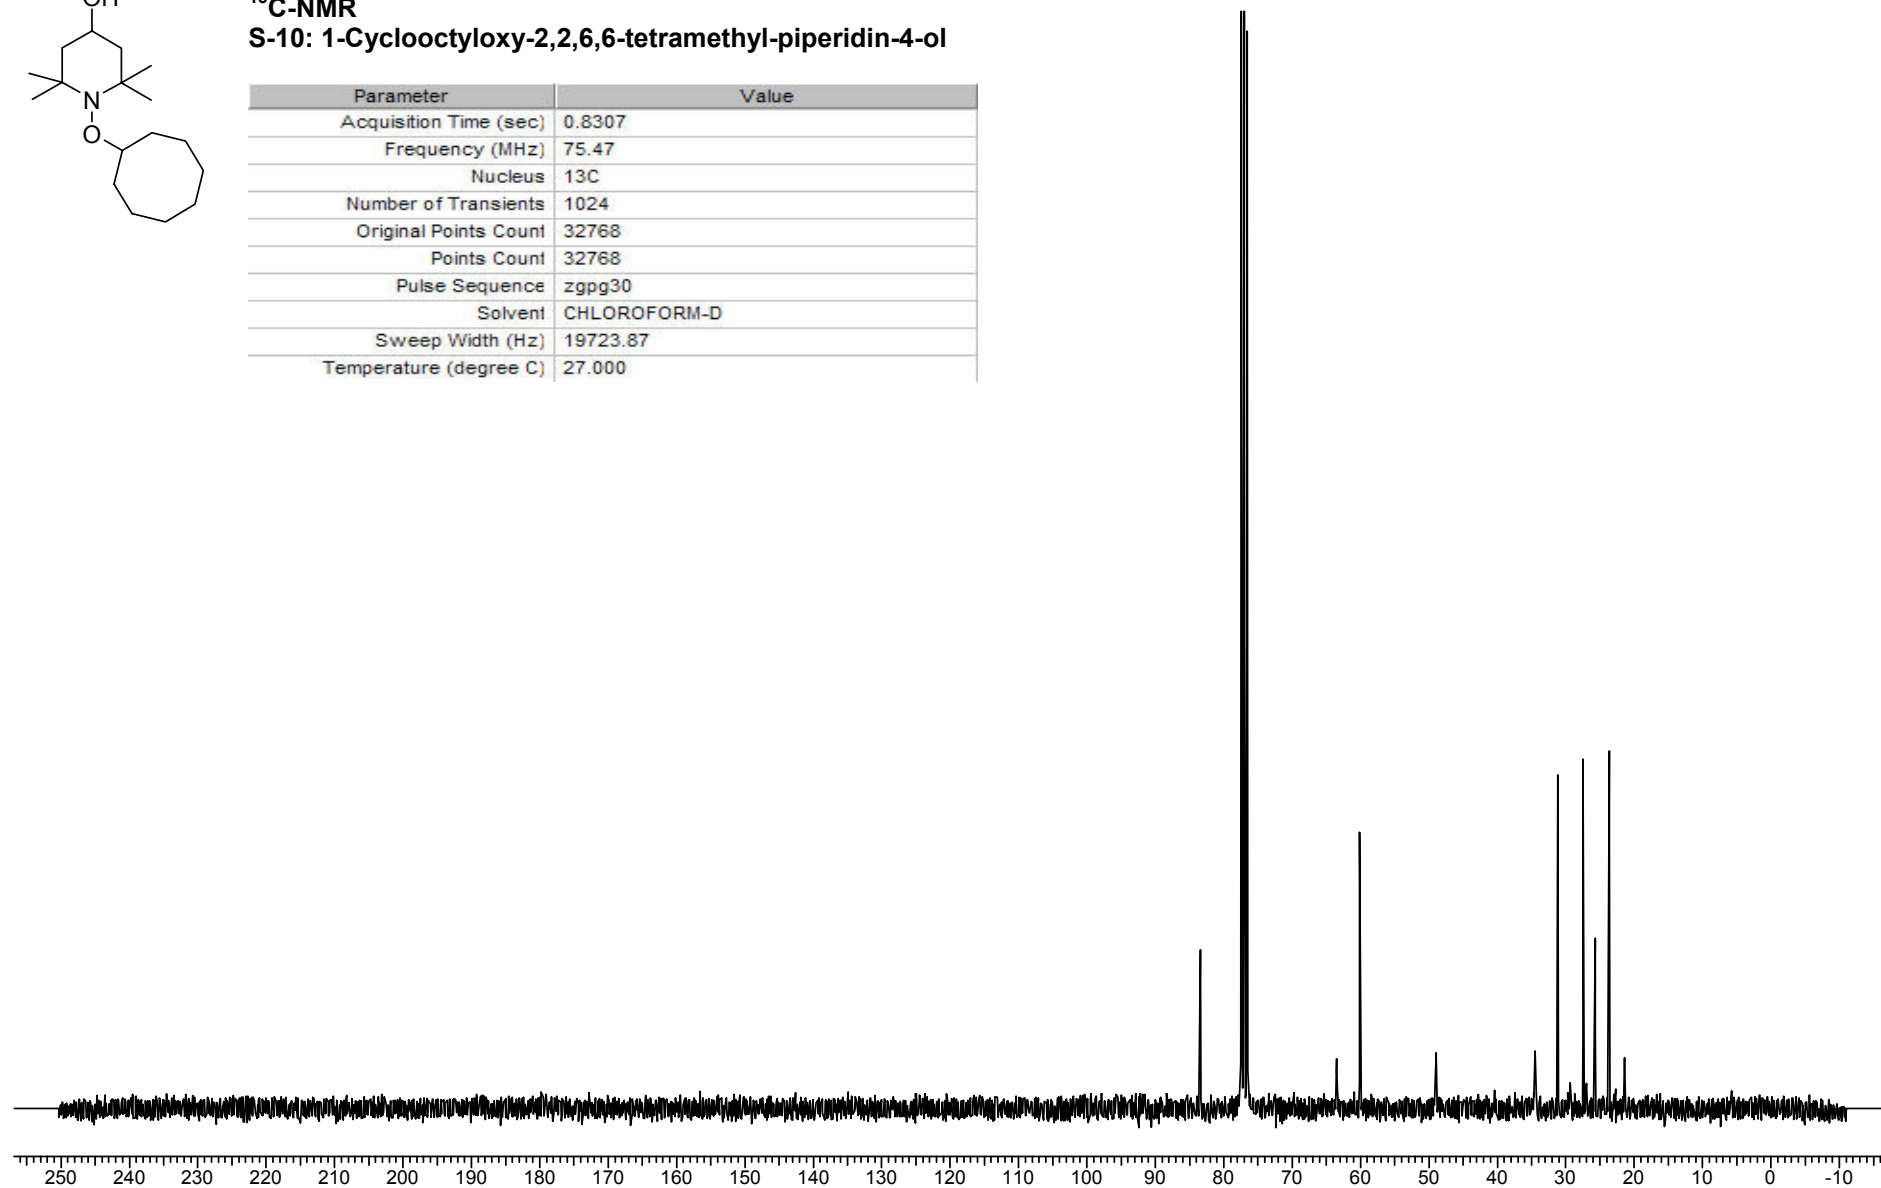

**BRUKER  
BIOSPIN**

Current Data Parameters  
NAME 20060828-4-7  
EXPNO 1  
PROCNO 1

F2 - Acquisition Parameters  
Date\_ 20060828  
Time 14.45  
INSTRUM dpx400  
PROBHD 5 mm QNP 1H/15  
PULPROG zg30  
TD 65536  
SOLVENT CDCl3  
NS 16  
DS 2  
SWH 8223.685 Hz  
FIDRES 0.125483 Hz  
AQ 3.9846387 sec  
RG 45.3  
DW 60.800 usec  
DE 7.50 usec  
TE 294.9 K  
D1 1.00000000 sec  
MCREST 0.00000000 sec  
MCWRK 0.01500000 sec

===== CHANNEL f1 =====  
NUC1 1H  
P1 8.20 usec  
PL1 -2.00 dB  
SFO1 400.1324008 MHz

F2 - Processing parameters  
SI 32768  
SF 400.1300000 MHz  
WDW EM  
SSB 0  
LB 0.30 Hz  
GB 0  
PC 1.00

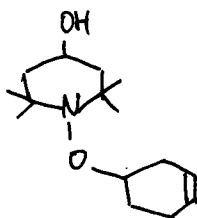

S-II

7.285

5.696  
5.678  
5.673  
5.630  
5.624  
5.604  
5.591  
5.584  
5.580  
5.566  
5.559  
5.556

4.007  
3.996  
3.985  
3.978  
3.967  
3.957  
3.949  
3.939  
3.928

2.413  
2.365  
2.204  
2.197  
2.157  
2.111  
2.095  
2.078  
2.059  
2.042  
1.837  
1.829

1.806  
1.713  
1.704  
1.681  
1.668  
1.655  
1.647  
1.635  
1.625  
1.558  
1.512  
1.500  
1.485  
1.454  
1.373  
1.365  
1.352  
1.315  
1.216  
1.207  
1.166  
0.009

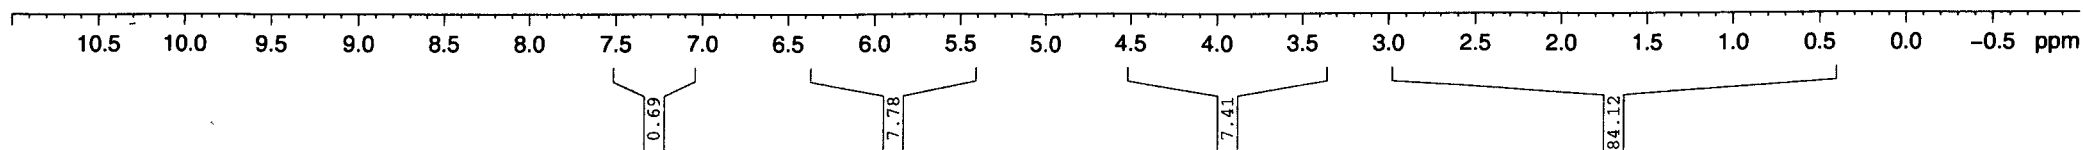

p40

AD\_C13PD2k CDCl3 D:

Current Data Parameters  
NAME 20080530-300-46  
EXPNO 1  
PROCNO 1

F2 - Acquisition Parameters  
Date\_ 20080531  
Time 9.03  
INSTRUM spect  
PROBHD 5 mm QNP 1H/13  
PULPROG zgpg30  
TD 65536  
SOLVENT CDCl3  
NS 2048  
DS 4  
SWH 19723.865 Hz  
FIDRES 0.300962 Hz  
AQ 1.6613876 sec  
RG 512  
DW 25.350 usec  
DE 6.50 usec  
TE 300.0 K  
D1 2.00000000 sec  
d11 0.03000000 sec  
DELTA 1.89999998 sec  
TD0 1

===== CHANNEL f1 =====  
NUC1 13C  
P1 11.90 usec  
PL1 -6.00 dB  
SFO1 75.4767751 MHz

===== CHANNEL f2 =====  
CPDPRG2 waltz16  
NUC2 1H  
PCPD2 100.00 usec  
PL2 -6.00 dB  
PL12 17.50 dB  
PL13 20.50 dB  
SFO2 300.1312005 MHz

F2 - Processing parameters  
SI 32768  
SF 75.4677490 MHz  
WDW EM  
SSB 0  
LB 1.00 Hz  
GB 0  
PC 1.40

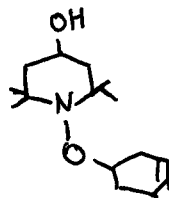

S-II

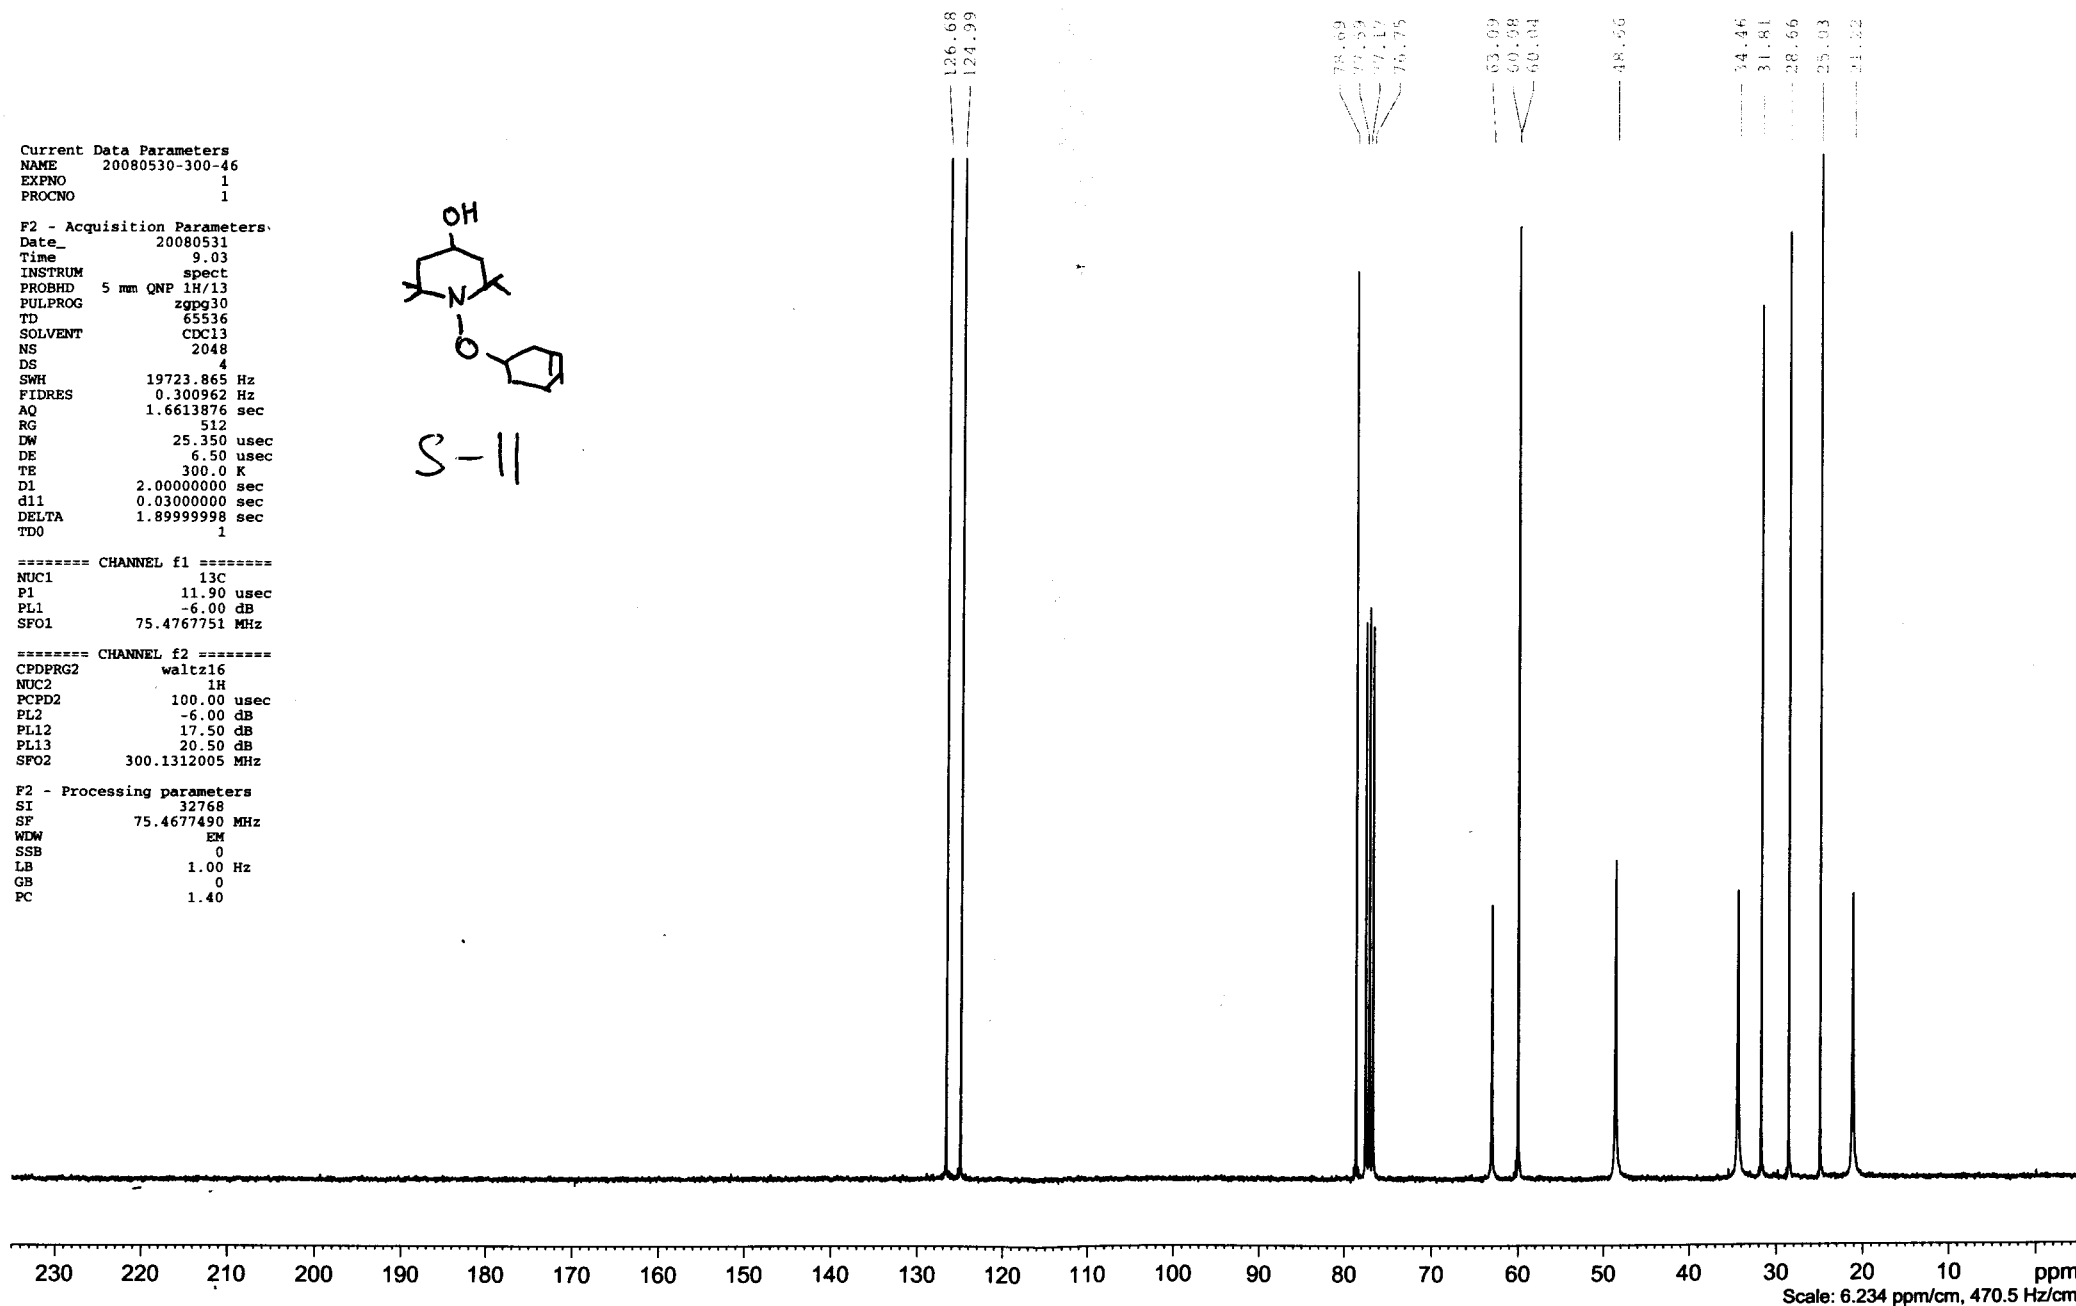

Scale: 6.234 ppm/cm, 470.5 Hz/cm

p41

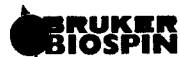

Current Data Parameters  
 NAME 20060828-4-7  
 EXPNO 2  
 PROCNO 1

F2 - Acquisition Parameters  
 Date\_ 20060828  
 Time 15.00  
 INSTRUM dpx400  
 PROBHD 5 mm QNP 1H/15  
 PULPROG jmod  
 TD 65536  
 SOLVENT CDCl3  
 NS 256  
 DS 4  
 SWH 26315.789 Hz  
 FIDRES 0.401547 Hz  
 AQ 1.2452340 sec  
 RG 2580.3  
 DW 19.000 usec  
 DE 10.00 usec  
 TE 295.1 K  
 CNST2 145.000000  
 CNST11 1.000000  
 D1 2.0000000 sec  
 d20 0.00689655 sec  
 DELTA 0.00000777 sec  
 MCREST 0.0000000 sec  
 MCWRK 0.01500000 sec

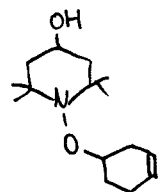

===== CHANNEL f1 =====  
 NUC1 13C  
 P1 6.10 usec  
 p2 12.20 usec  
 PL1 -2.00 dB  
 SFO1 100.6248421 MHz

===== CHANNEL f2 =====  
 CPDPRG2 waltz16  
 NUC2 1H  
 PCPD2 80.00 usec  
 PL2 -2.00 dB  
 PL12 20.00 dB  
 SFO2 400.1316005 MHz

F2 - Processing parameters  
 SI 32768  
 SF 100.6127690 MHz  
 WDW EM  
 SSB 0  
 LB 1.00 Hz  
 GB 0  
 PC 1.40

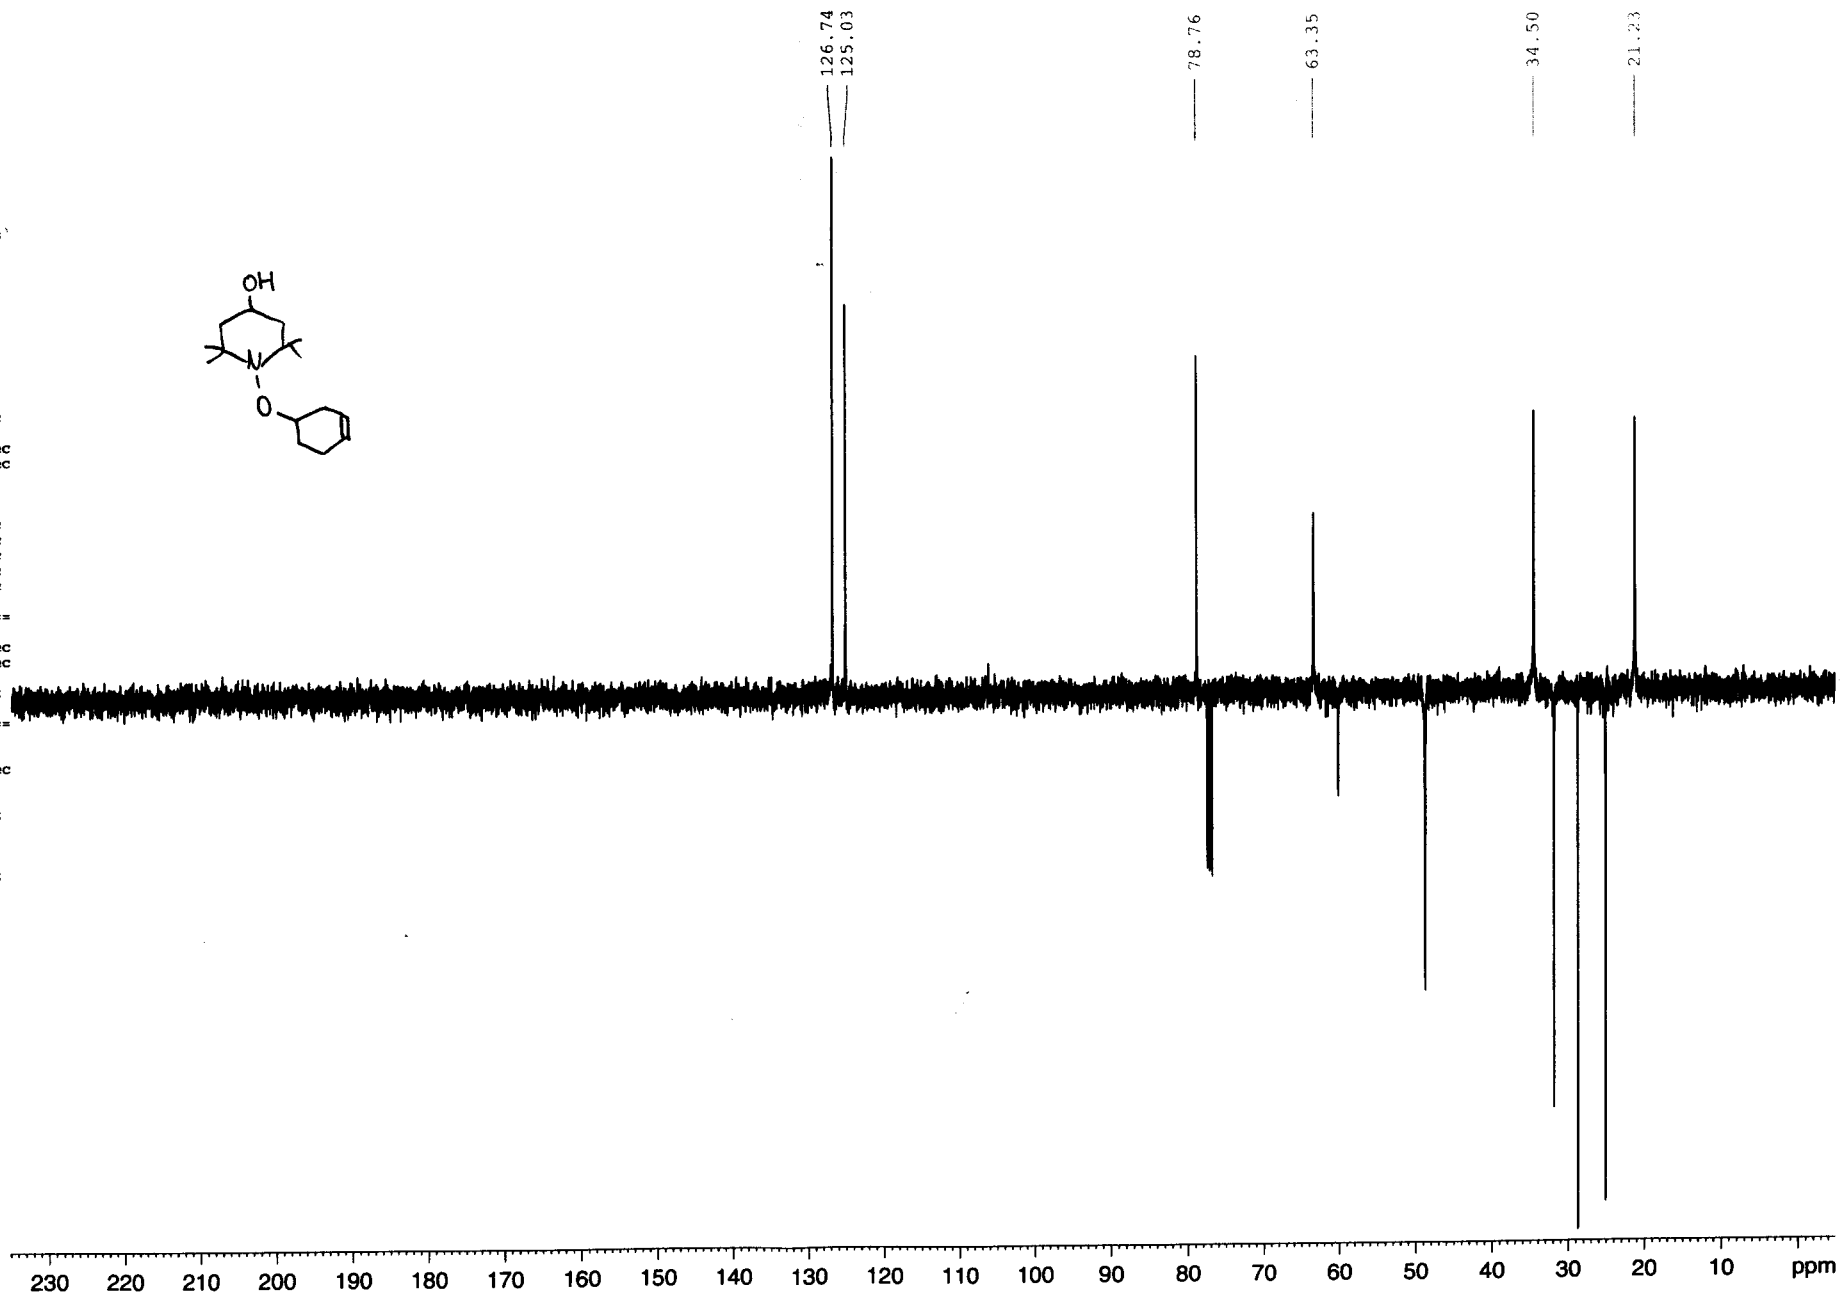

AD\_PROT16 CDC13 D:

p42

Ciba

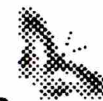

BRUKER dpx 300

Current Data Parameters  
NAME 20081003-300-25  
EXPNO 1  
PROCNO 1

F2 - Acquisition Parameters  
Date\_ 20081003  
Time 14.39  
INSTRUM spect  
PROBHD 5 mm QNP 1H/13  
PULPROG zg30  
TD 65536  
SOLVENT CDC13  
NS 16  
DS 2  
SWH 6172.839 Hz  
FIDRES 0.094190 Hz  
AQ 5.3084660 sec  
RG 228.1  
DW 81.000 usec  
DE 6.50 usec  
TE 300.0 K  
D1 1.00000000 sec  
TD0 1

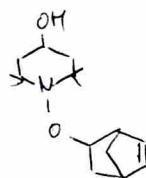

S-12

===== CHANNEL f1 =====  
NUC1 1H  
P1 8.30 usec  
PL1 -6.00 dB  
SFO1 300.1318008 MHz

F2 - Processing parameters  
SI 32768  
SF 300.1300043 MHz  
WDW EM  
SSB 0  
LB 0.30 Hz  
GB 0  
PC 1.00

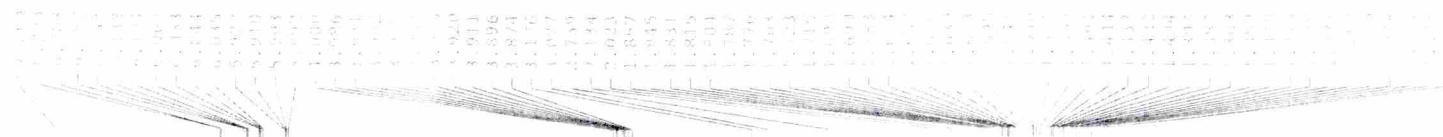

10.5 10.0 9.5 9.0 8.5 8.0 7.5 7.0 6.5 6.0 5.5 5.0 4.5 4.0 3.5 3.0 2.5 2.0 1.5 1.0 0.5 0.0 -0.5 ppm  
Scale: 0.3117 ppm/cm, 93.55 Hz/cm

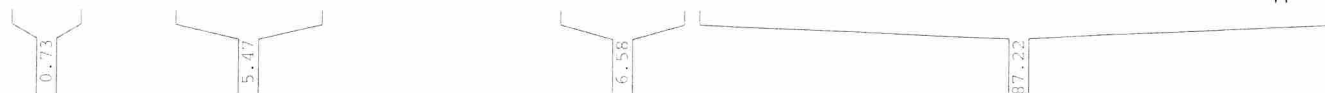

K001010 05 17 01  
 RE\_C0101 DTR 0003 D 16 41

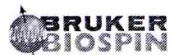

Current Data Parameters  
 NAME 20080710-300-41  
 EXPNO 2  
 PROCNO 1

F2 - Acquisition Parameters  
 Date\_ 20080710  
 Time 21.19  
 INSTRUM spect  
 PROSHD 5 mm QNP 1H/13  
 PULPROG zgpg30  
 TD 65536  
 SOLVENT CDCl3  
 NS 1024  
 DS 4  
 SWH 19723.865 Hz  
 FIDRES 0.300962 Hz  
 AQ 1.6613876 sec  
 RG 512  
 DW 25.350 usec  
 DE 6.50 usec  
 TE 300.0 K  
 DT 2.00000000 sec  
 d11 0.03000000 sec  
 DELTA 1.89999998 sec  
 TD0 1

===== CHANNEL f1 =====  
 NUC1 13C  
 P1 11.90 usec  
 PL1 -6.00 dB  
 SFO1 75.4767751 MHz

===== CHANNEL f2 =====  
 CPDPRG2 waltz16  
 NUC2 1H  
 PCPD2 100.00 usec  
 PL2 -6.00 dB  
 PL12 17.50 dB  
 PL13 20.50 dB  
 SFO2 300.1312005 MHz

F2 - Processing parameters  
 SI 32768  
 SF 75.4677490 MHz  
 WDW EM  
 SSB 0  
 LB 1.00 Hz  
 GB 0  
 PC 1.40

S-12

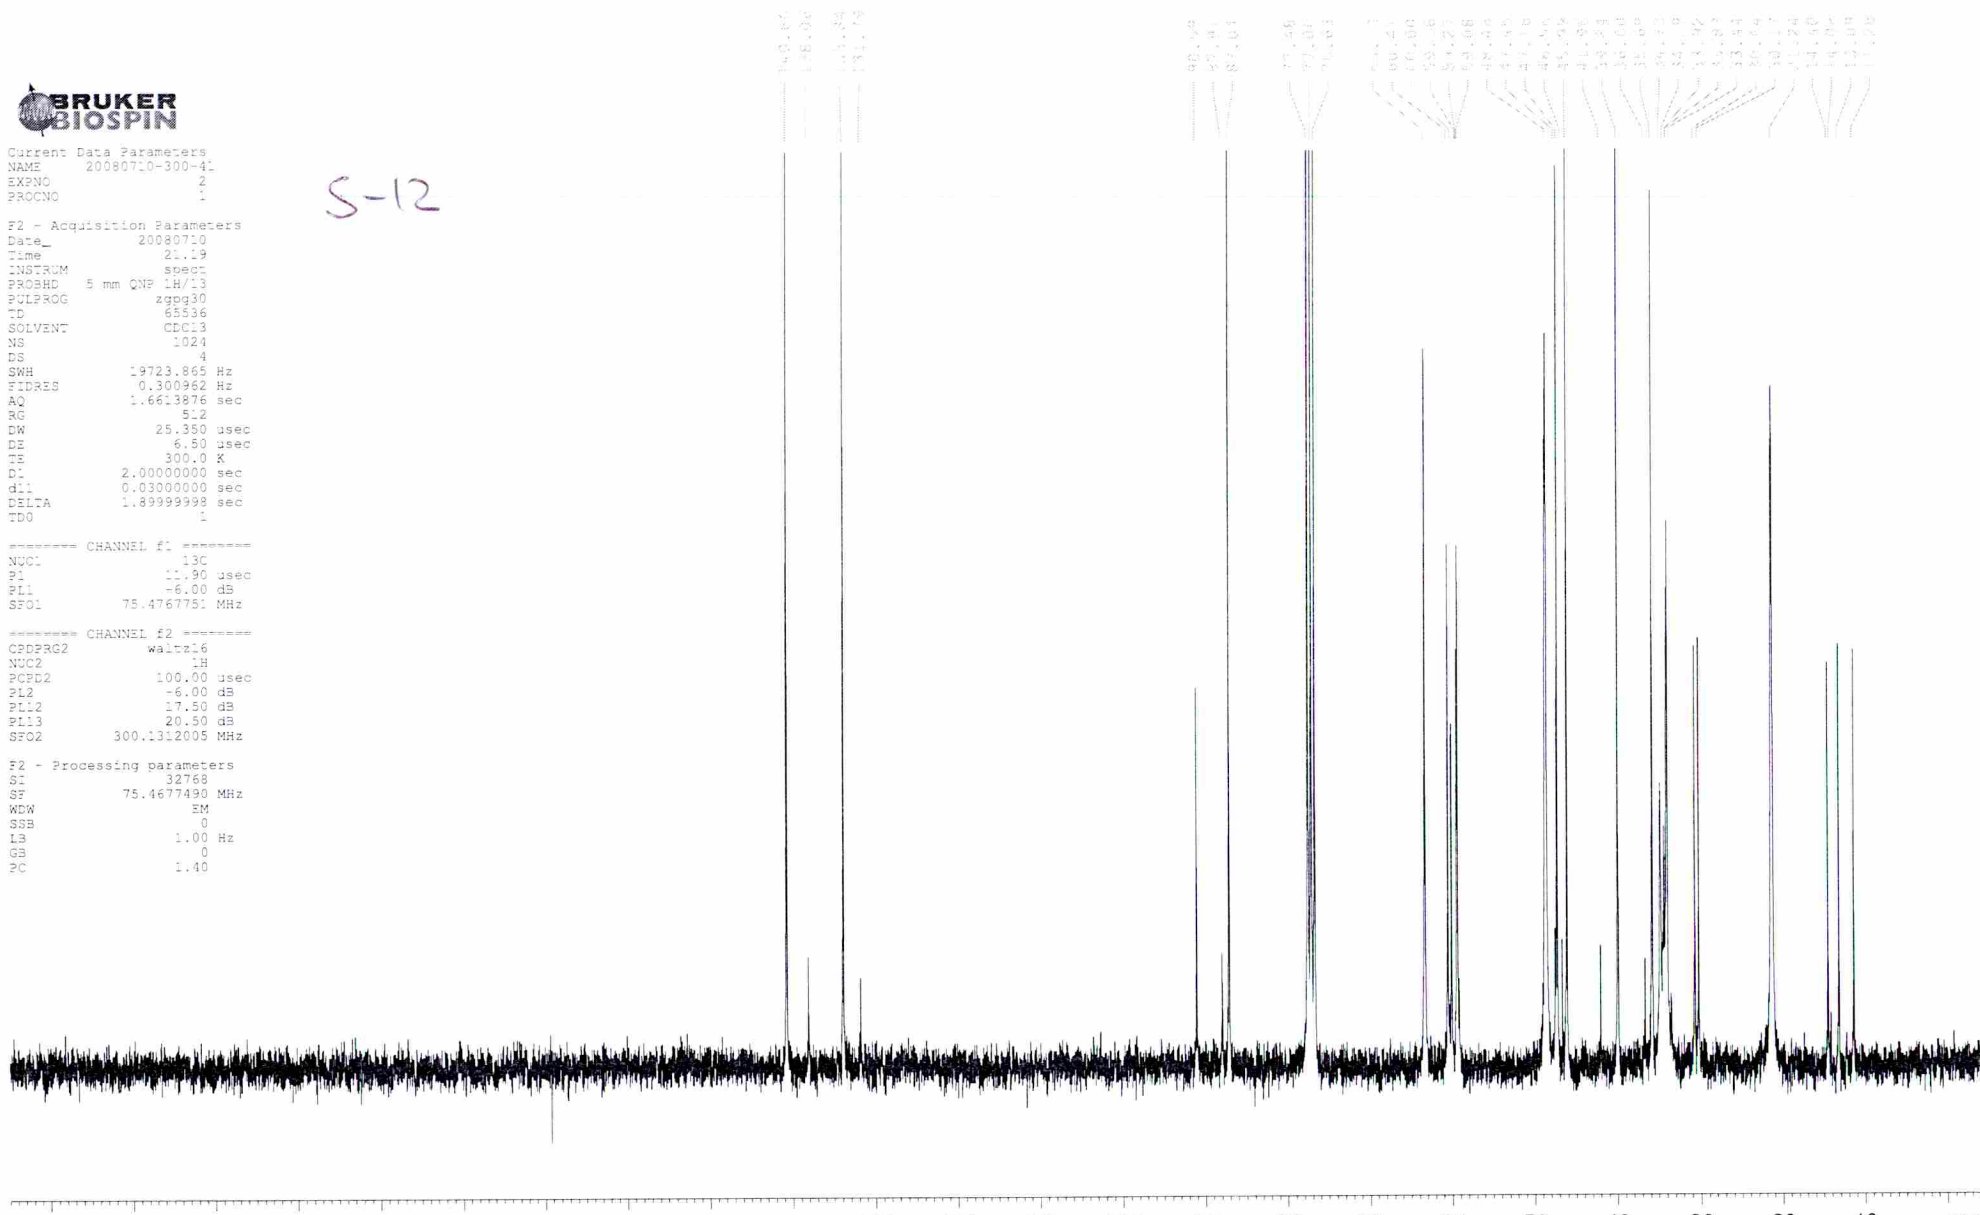

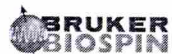

Current Data Parameters  
NAME 20080714-300-37  
EXPNO 2  
PROCNO 1

F2 - Acquisition Parameters  
Date\_ 20080714  
Time 23.18  
INSTRUM spect  
PROBHD 5 mm QNP 1H/13  
PULPROG jmod  
TD 65536  
SOLVENT CDCl3  
NS 4096  
DS 4  
SWH 19723.865 Hz  
FIDRES 0.300962 Hz  
AQ 1.6613876 sec  
RG 512  
DW 25.350 usec  
DE 6.50 usec  
TE 300.0 K  
CNS12 145.000000  
CNS11 1.000000  
D1 2.0000000 sec  
d20 0.00689655 sec  
DELTA 0.00001515 sec  
TD0 1

===== CHANNEL f1 =====  
NUC1 13C  
P1 11.90 usec  
p2 23.80 usec  
PL1 -6.00 dB  
SFO1 75.4768051 MHz

===== CHANNEL f2 =====  
CPDPRG2 waltz16  
NUC2 1H  
PCPD2 100.00 usec  
PL2 -6.00 dB  
PL12 17.50 dB  
SFO2 300.1312005 MHz

F2 - Processing parameters  
SI 32768  
SF 75.4677490 MHz  
WDW EM  
SSB 0  
LB 1.00 Hz  
GB 0  
PC 1.40

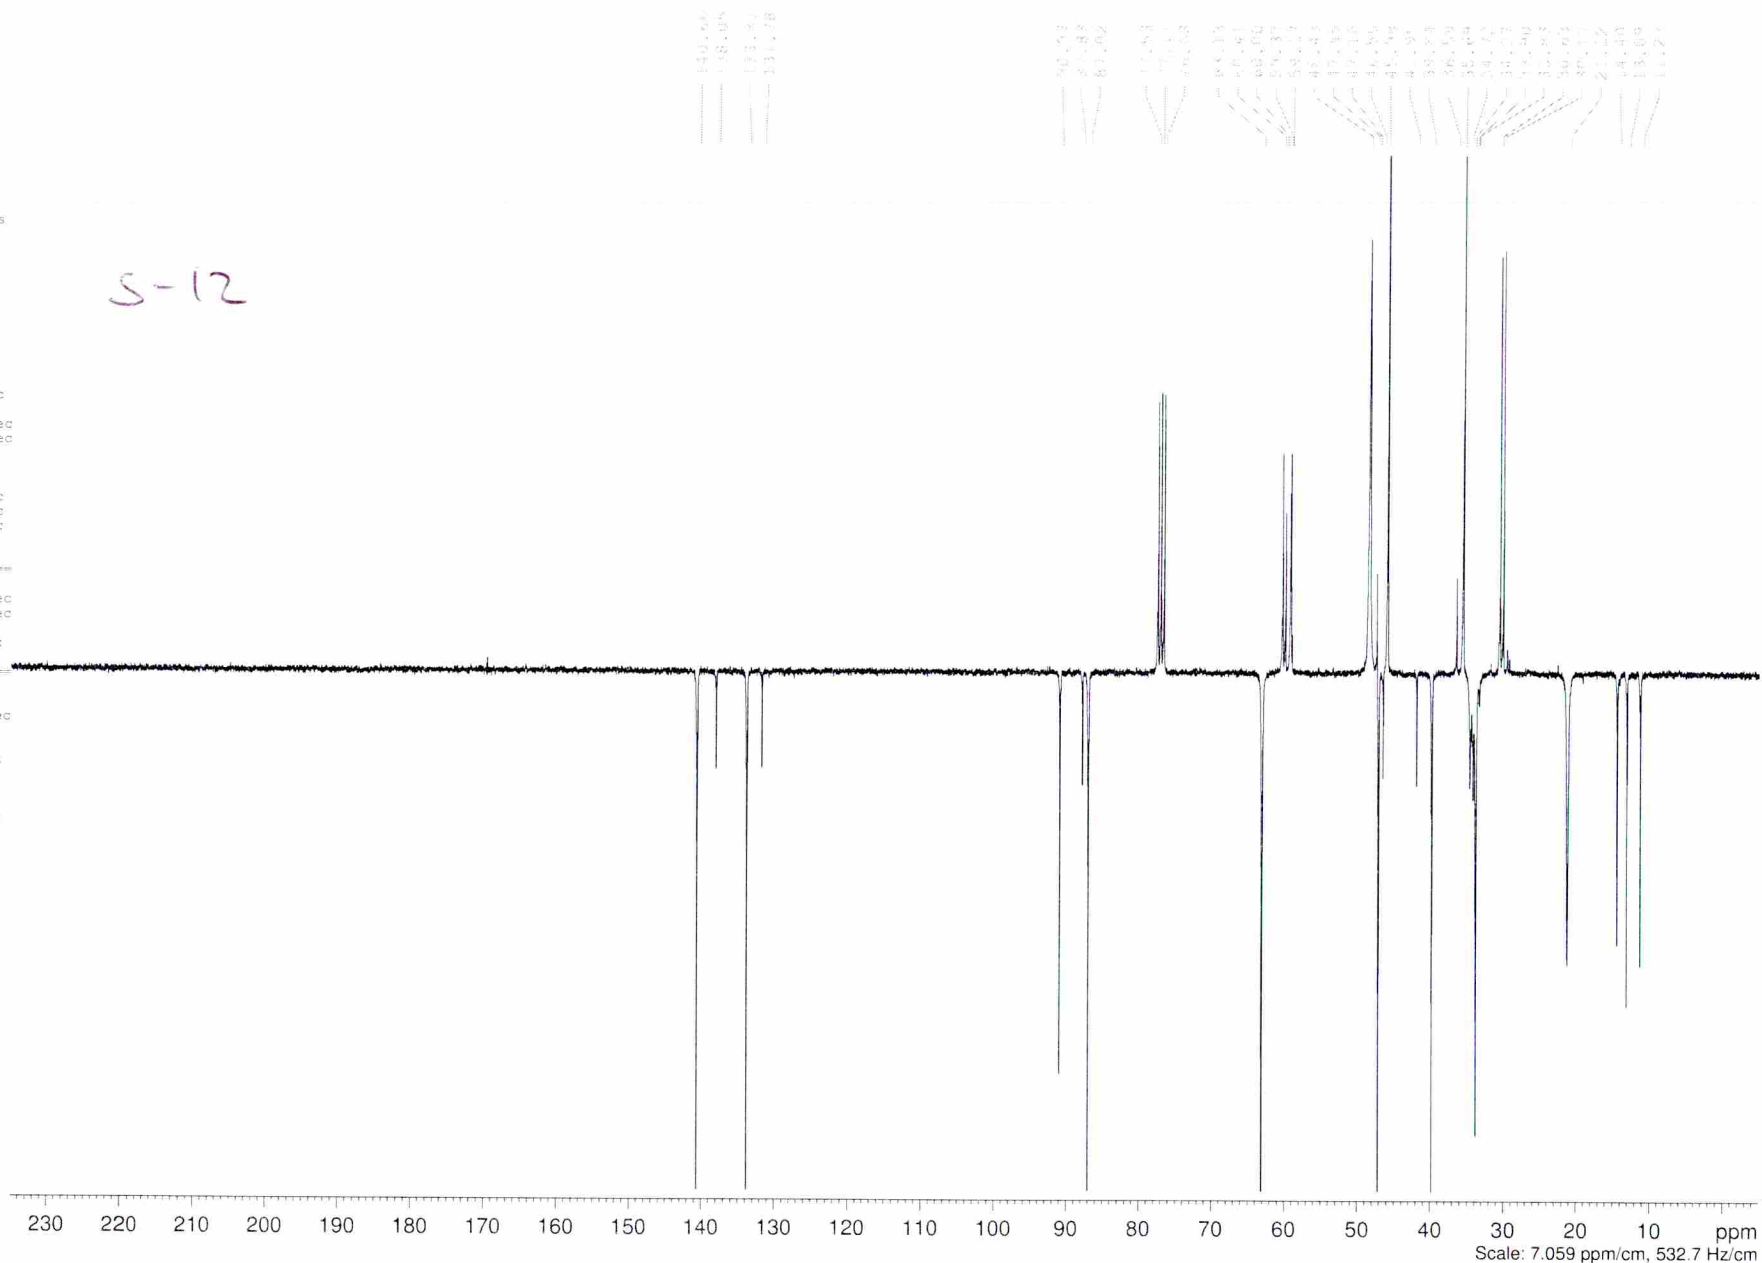

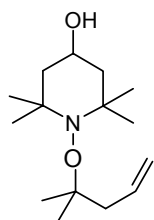**<sup>1</sup>H-NMR****S-13: 1-(1,1-Dimethyl-but-3-enyloxy)-2,2,6,6-tetramethyl-piperidin-4-ol**

| Parameter              | Value          |
|------------------------|----------------|
| Acquisition Time (sec) | 1.9923         |
| Frequency (MHz)        | 400.13         |
| Nucleus                | <sup>1</sup> H |
| Number of Transients   | 16             |
| Original Points Count  | 32768          |
| Points Count           | 32768          |
| Pulse Sequence         | zg30           |
| Solvent                | CHLOROFORM-D   |
| Sweep Width (Hz)       | 8223.68        |
| Temperature (degree C) | 22.000         |

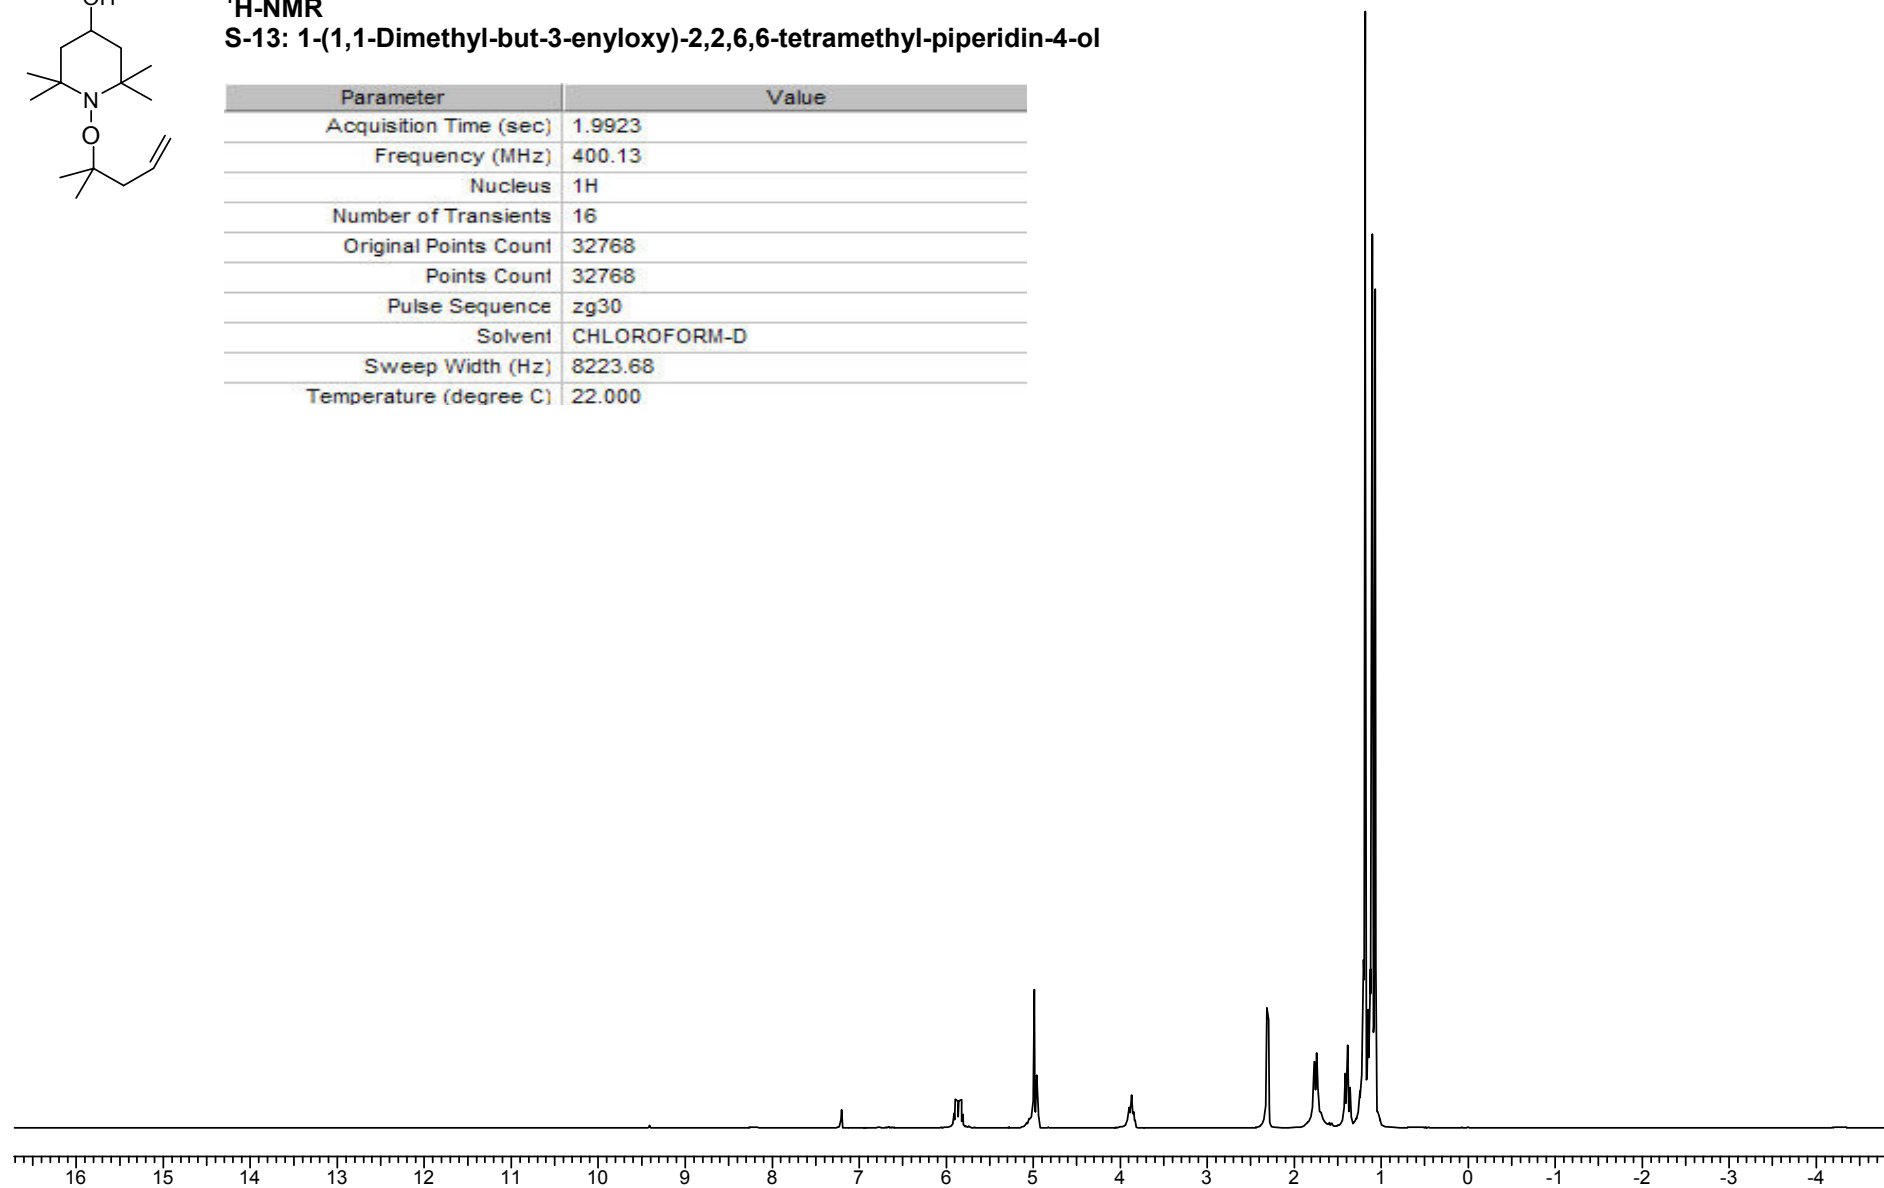

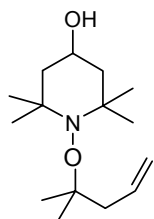**<sup>13</sup>C-NMR****S-13: 1-(1,1-Dimethyl-but-3-enyloxy)-2,2,6,6-tetramethyl-piperidin-4-ol**

| Parameter              | Value           |
|------------------------|-----------------|
| Acquisition Time (sec) | 0.6226          |
| Frequency (MHz)        | 100.61          |
| Nucleus                | <sup>13</sup> C |
| Number of Transients   | 1024            |
| Original Points Count  | 32768           |
| Points Count           | 32768           |
| Pulse Sequence         | zgpg30          |
| Solvent                | CHLOROFORM-D    |
| Sweep Width (Hz)       | 26315.79        |
| Temperature (degree C) | 22.000          |

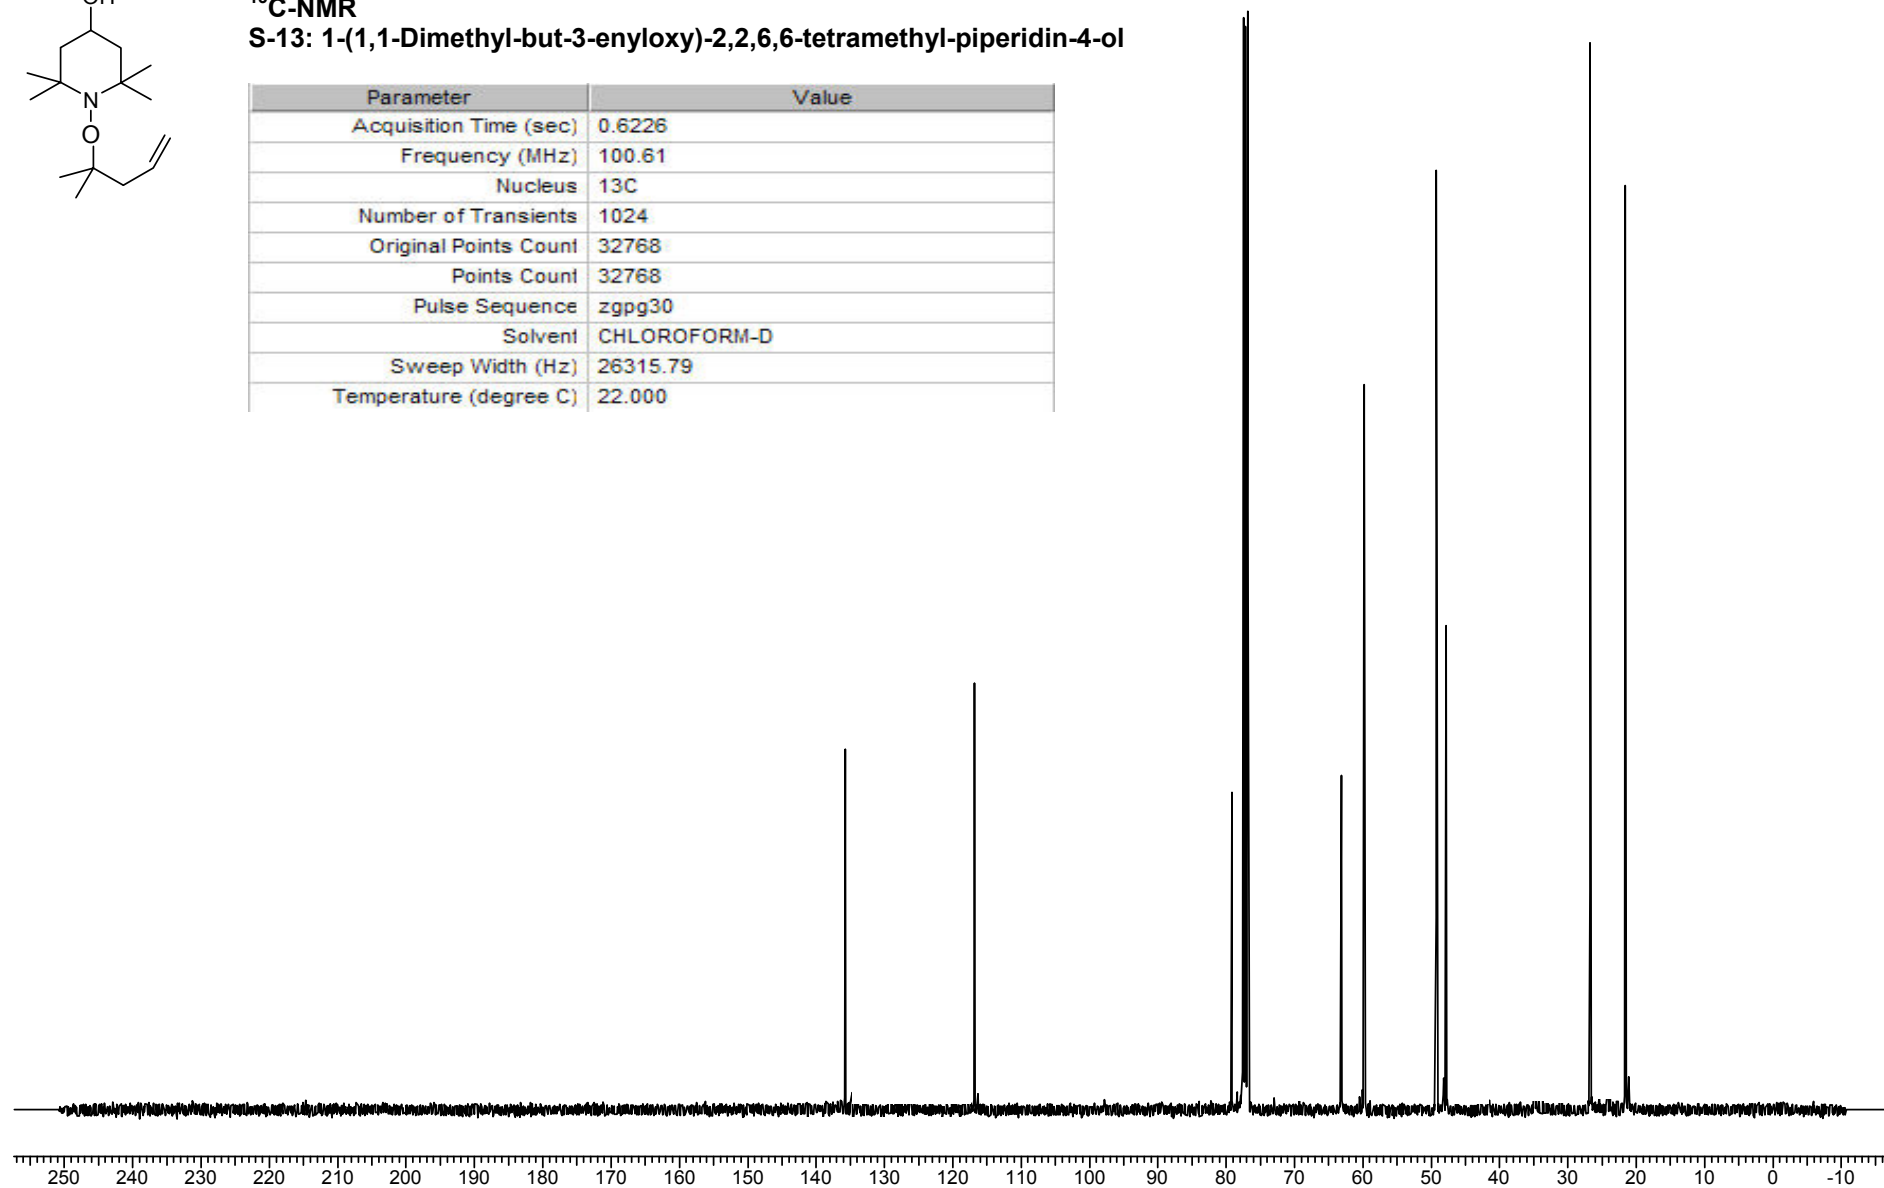

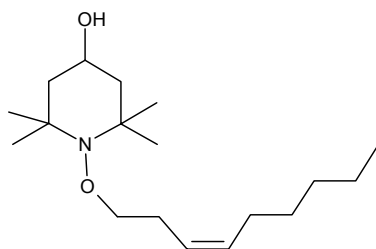

**<sup>1</sup>H-NMR**  
**S-14:**

| Parameter              | Value        |
|------------------------|--------------|
| Acquisition Time (sec) | 1.9923       |
| Frequency (MHz)        | 400.13       |
| Nucleus                | 1H           |
| Number of Transients   | 16           |
| Original Points Count  | 32768        |
| Points Count           | 32768        |
| Pulse Sequence         | zg30         |
| Solvent                | CHLOROFORM-D |
| Sweep Width (Hz)       | 8223.68      |
| Temperature (degree C) | 22.000       |

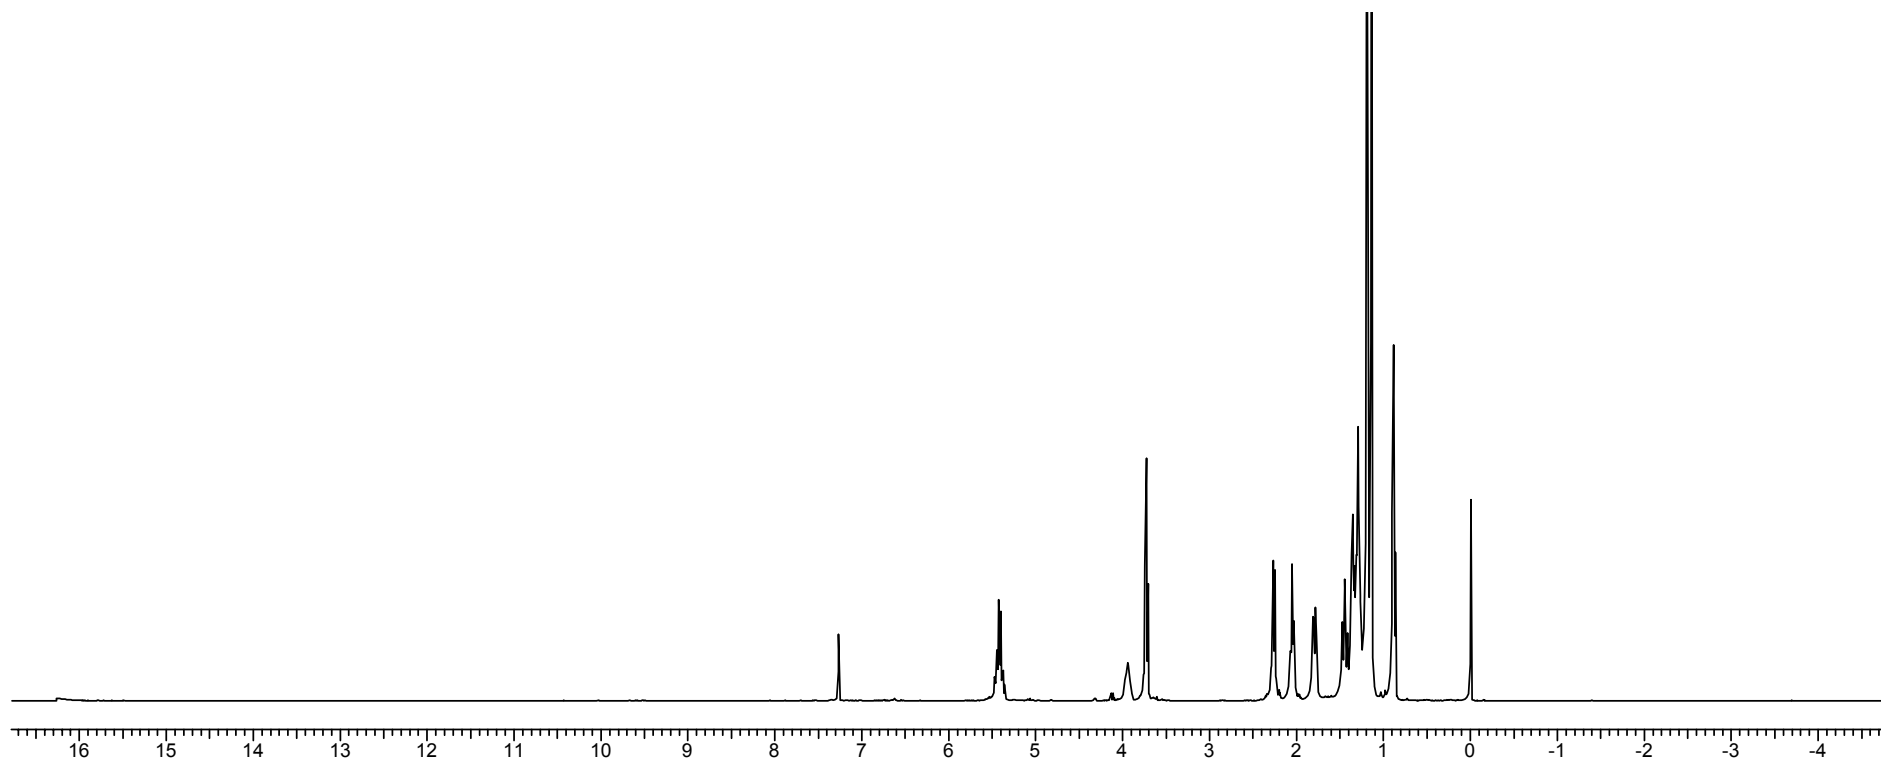

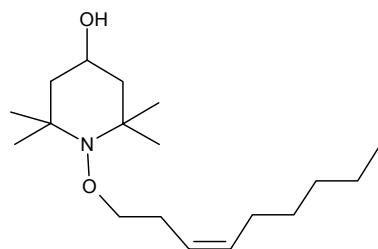

**<sup>13</sup>C-NMR**  
**S-14:**

| Parameter              | Value        |
|------------------------|--------------|
| Acquisition Time (sec) | 0.6226       |
| Frequency (MHz)        | 100.61       |
| Nucleus                | 13C          |
| Number of Transients   | 256          |
| Original Points Count  | 32768        |
| Points Count           | 32768        |
| Pulse Sequence         | zgpg30       |
| Solvent                | CHLOROFORM-D |
| Sweep Width (Hz)       | 26315.79     |
| Temperature (degree C) | 22.000       |

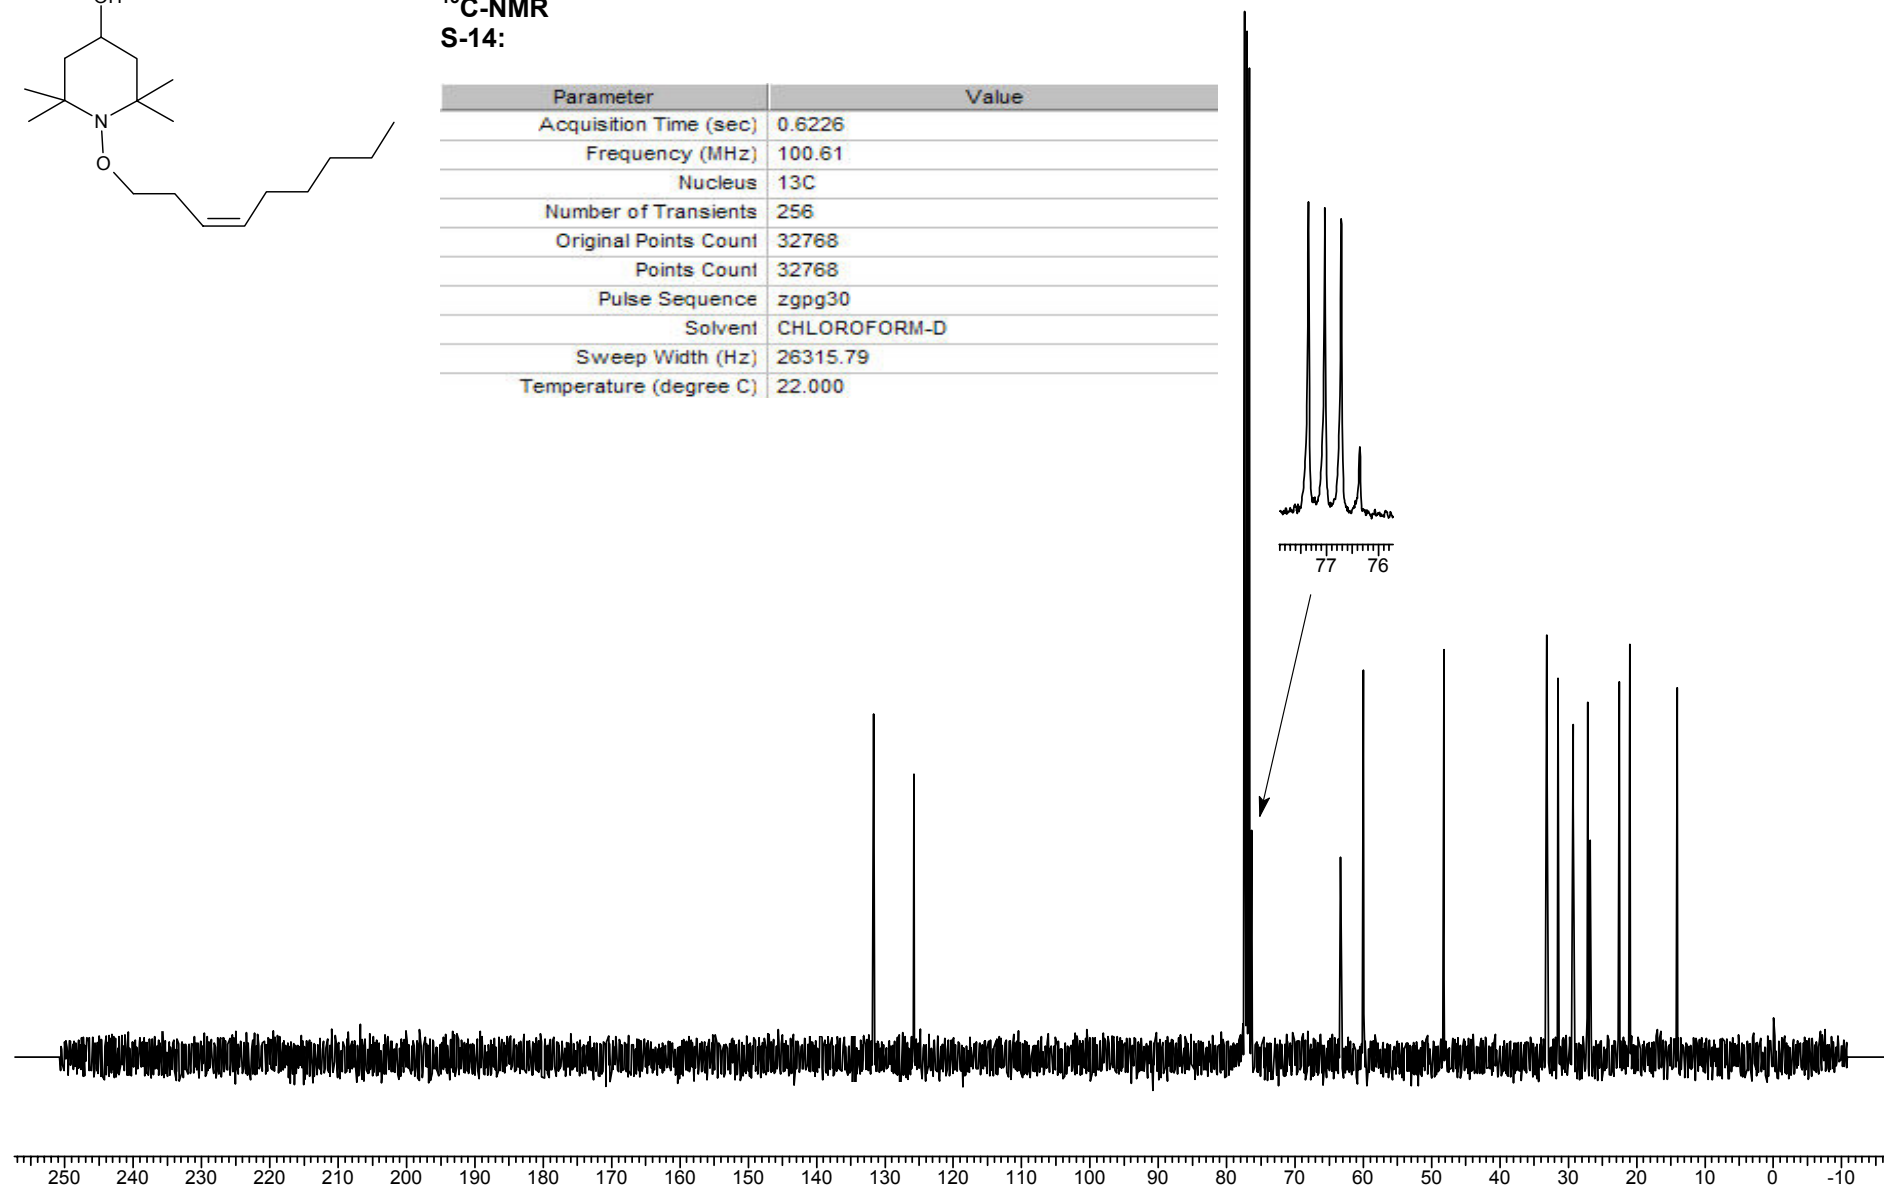

p49

**BRUKER  
BIOSPIN**

Current Data Parameters  
NAME 20061006-4-11  
EXPNO 1  
PROCNO 1

F2 - Acquisition Parameters  
Date\_ 20061006  
Time 16.13  
INSTRUM dpx400  
PROBHD 5 mm QNP 1H/15  
PULPROG zg30  
TD 65536  
SOLVENT CDC13  
NS 16  
DS 2  
SWH 8223.685 Hz  
FIDRES 0.125483 Hz  
AQ 3.9846387 sec  
RG 40.3  
DW 60.800 usec  
DE 7.50 usec  
TE 294.4 K  
D1 1.00000000 sec  
MCREST 0.00000000 sec  
MCWRK 0.01500000 sec

----- CHANNEL f1 -----  
NUC1 1H  
P1 8.20 usec  
PL1 -2.00 dB  
SF01 400.1324008 MHz

F2 - Processing parameters  
SI 32768  
SF 400.1300000 MHz  
WDW EM  
SSB 0  
LB 0.30 Hz  
GB 0  
PC 1.00

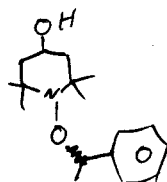

S-15

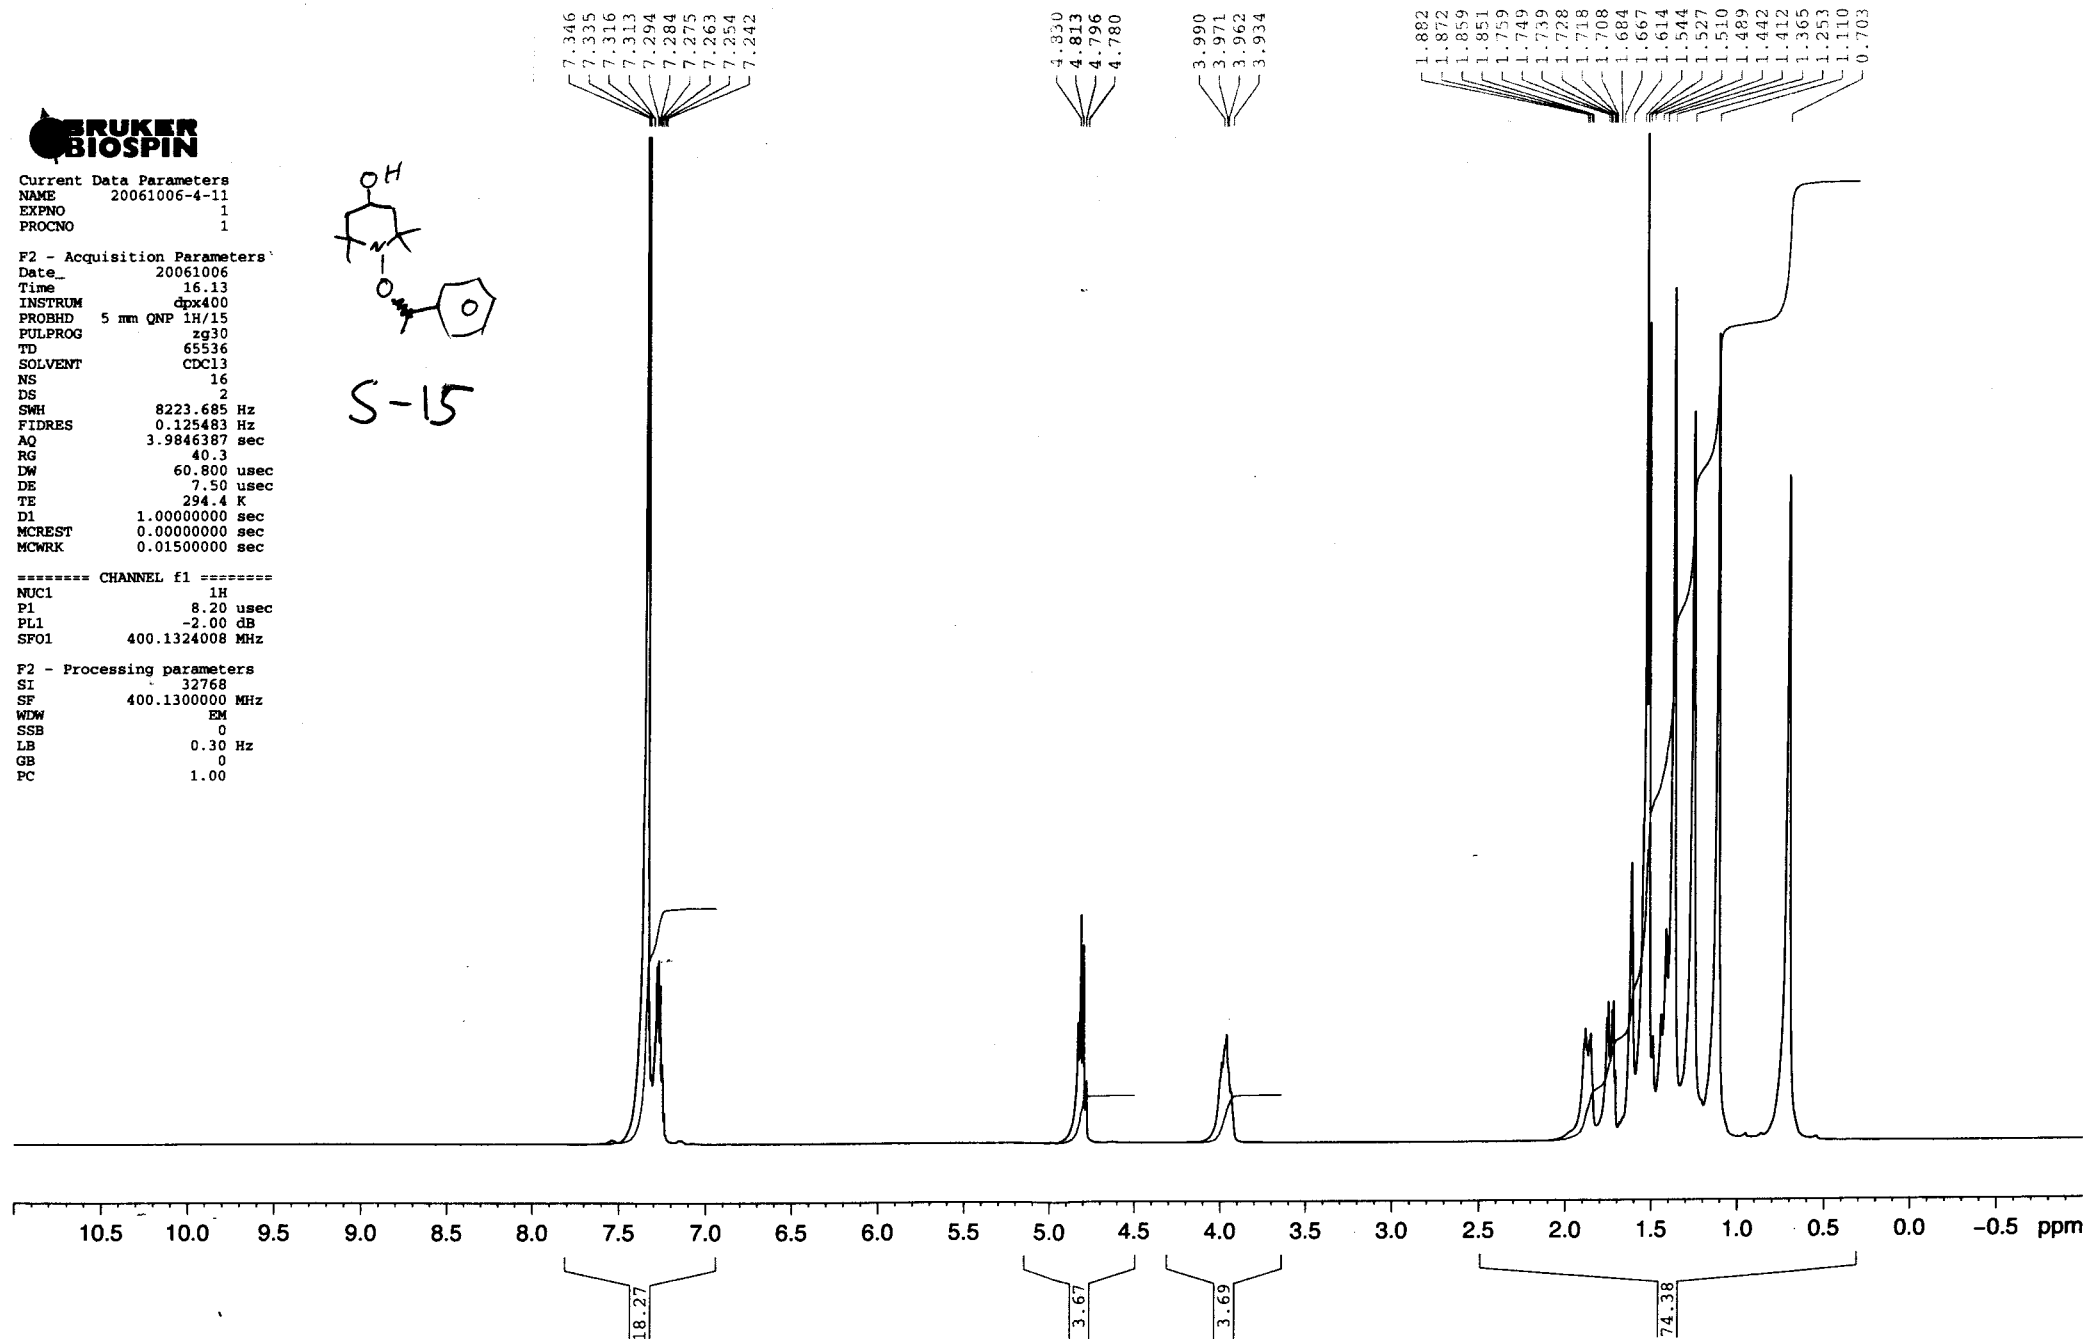

p50

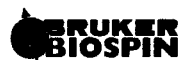

Current Data Parameters  
NAME 20061006-4-11  
EXPNO 2  
PROCNO 1

F2 - Acquisition Parameters  
Date\_ 20061007  
Time 2.43  
INSTRUM dpx400  
PROBHD 5 mm QNP 1H/15  
PULPROG zgpg30  
TD 65536  
SOLVENT CDCl3  
NS 4096  
DS 4  
SWH 26315.789 Hz  
FIDRES 0.401547 Hz  
AQ 1.2452340 sec  
RG 4096  
DW 19.000 usec  
DE 10.00 usec  
TE 293.9 K  
D1 2.00000000 sec  
d11 0.03000000 sec  
MCREST 0.00000000 sec  
MCWRK 0.01500000 sec

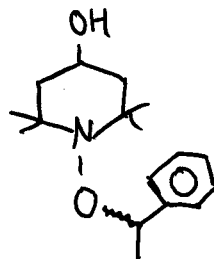

===== CHANNEL f1 =====  
NUC1 13C  
P1 6.10 usec  
PL1 -2.00 dB  
SFO1 100.6248421 MHz

===== CHANNEL f2 =====  
CPDPRG2 waltz16  
NUC2 1H  
PCPD2 80.00 usec  
PL2 -2.00 dB  
PL12 20.00 dB  
PL13 23.00 dB  
SFO2 400.1316005 MHz

F2 - Processing parameters  
SI 32768  
SF 100.6127690 MHz  
WDW EM  
SSB 0  
LB 1.00 Hz  
GB 0  
PC 1.40

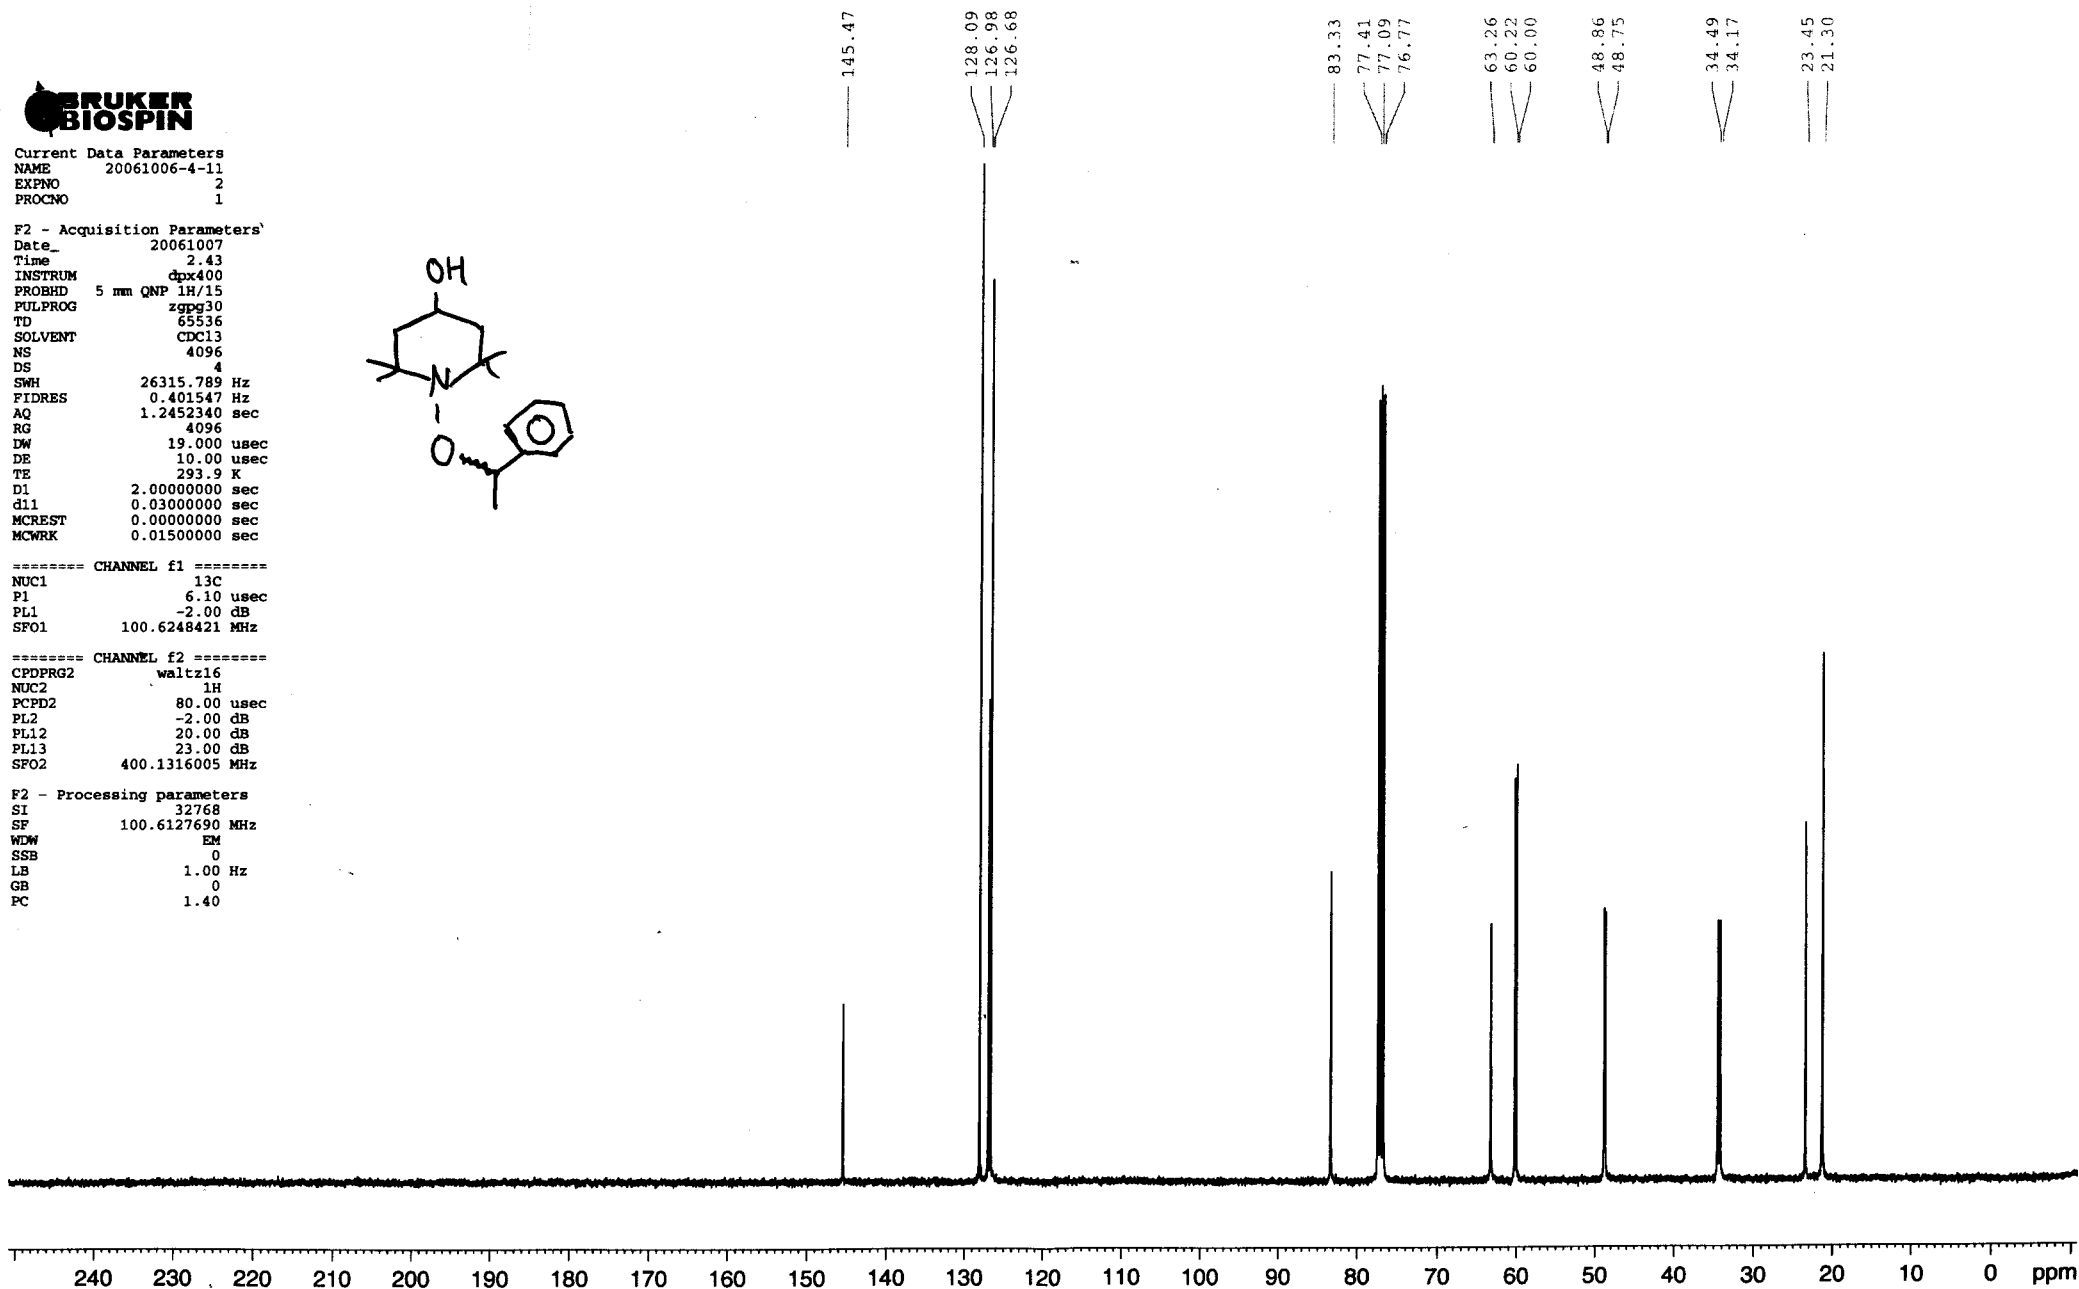

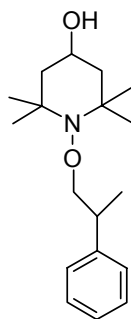

**<sup>1</sup>H-NMR:**  
**S-16: 2,2,6,6-Tetramethyl-1-(2-phenyl-propoxy)-piperidin-4-ol**

| Parameter              | Value          |
|------------------------|----------------|
| Acquisition Time (sec) | 1.9923         |
| Frequency (MHz)        | 400.13         |
| Nucleus                | <sup>1</sup> H |
| Number of Transients   | 16             |
| Original Points Count  | 32768          |
| Points Count           | 32768          |
| Pulse Sequence         | zg30           |
| Solvent                | CHLOROFORM-D   |
| Sweep Width (Hz)       | 8223.68        |
| Temperature (degree C) | 22.000         |

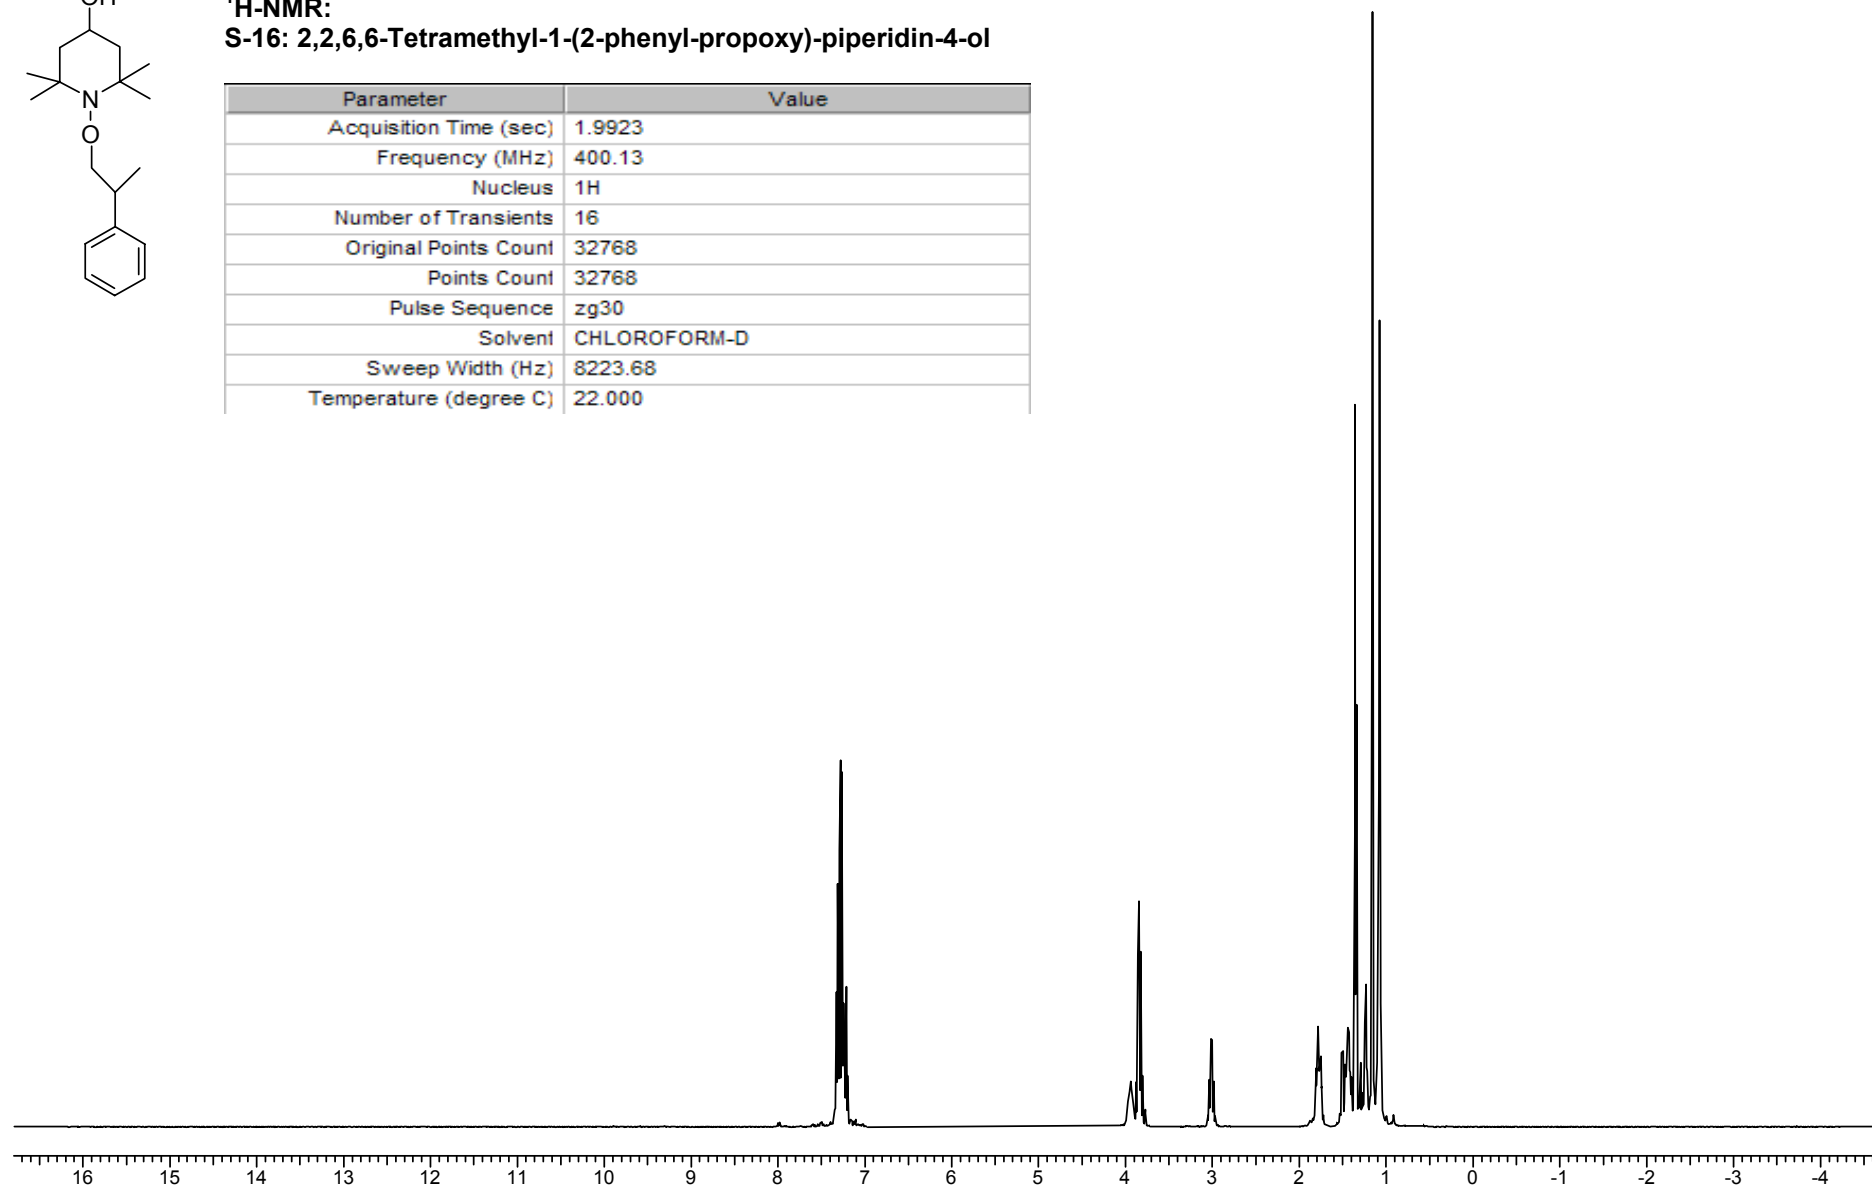

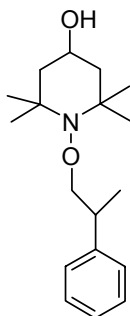<sup>13</sup>C-NMR:**S-16: 2,2,6,6-Tetramethyl-1-(2-phenyl-propoxy)-piperidin-4-ol**

| Parameter              | Value        |
|------------------------|--------------|
| Acquisition Time (sec) | 0.6226       |
| Frequency (MHz)        | 100.61       |
| Nucleus                | 13C          |
| Number of Transients   | 256          |
| Original Points Count  | 32768        |
| Points Count           | 32768        |
| Pulse Sequence         | zgpg30       |
| Solvent                | CHLOROFORM-D |
| Sweep Width (Hz)       | 26315.79     |
| Temperature (degree C) | 22.000       |

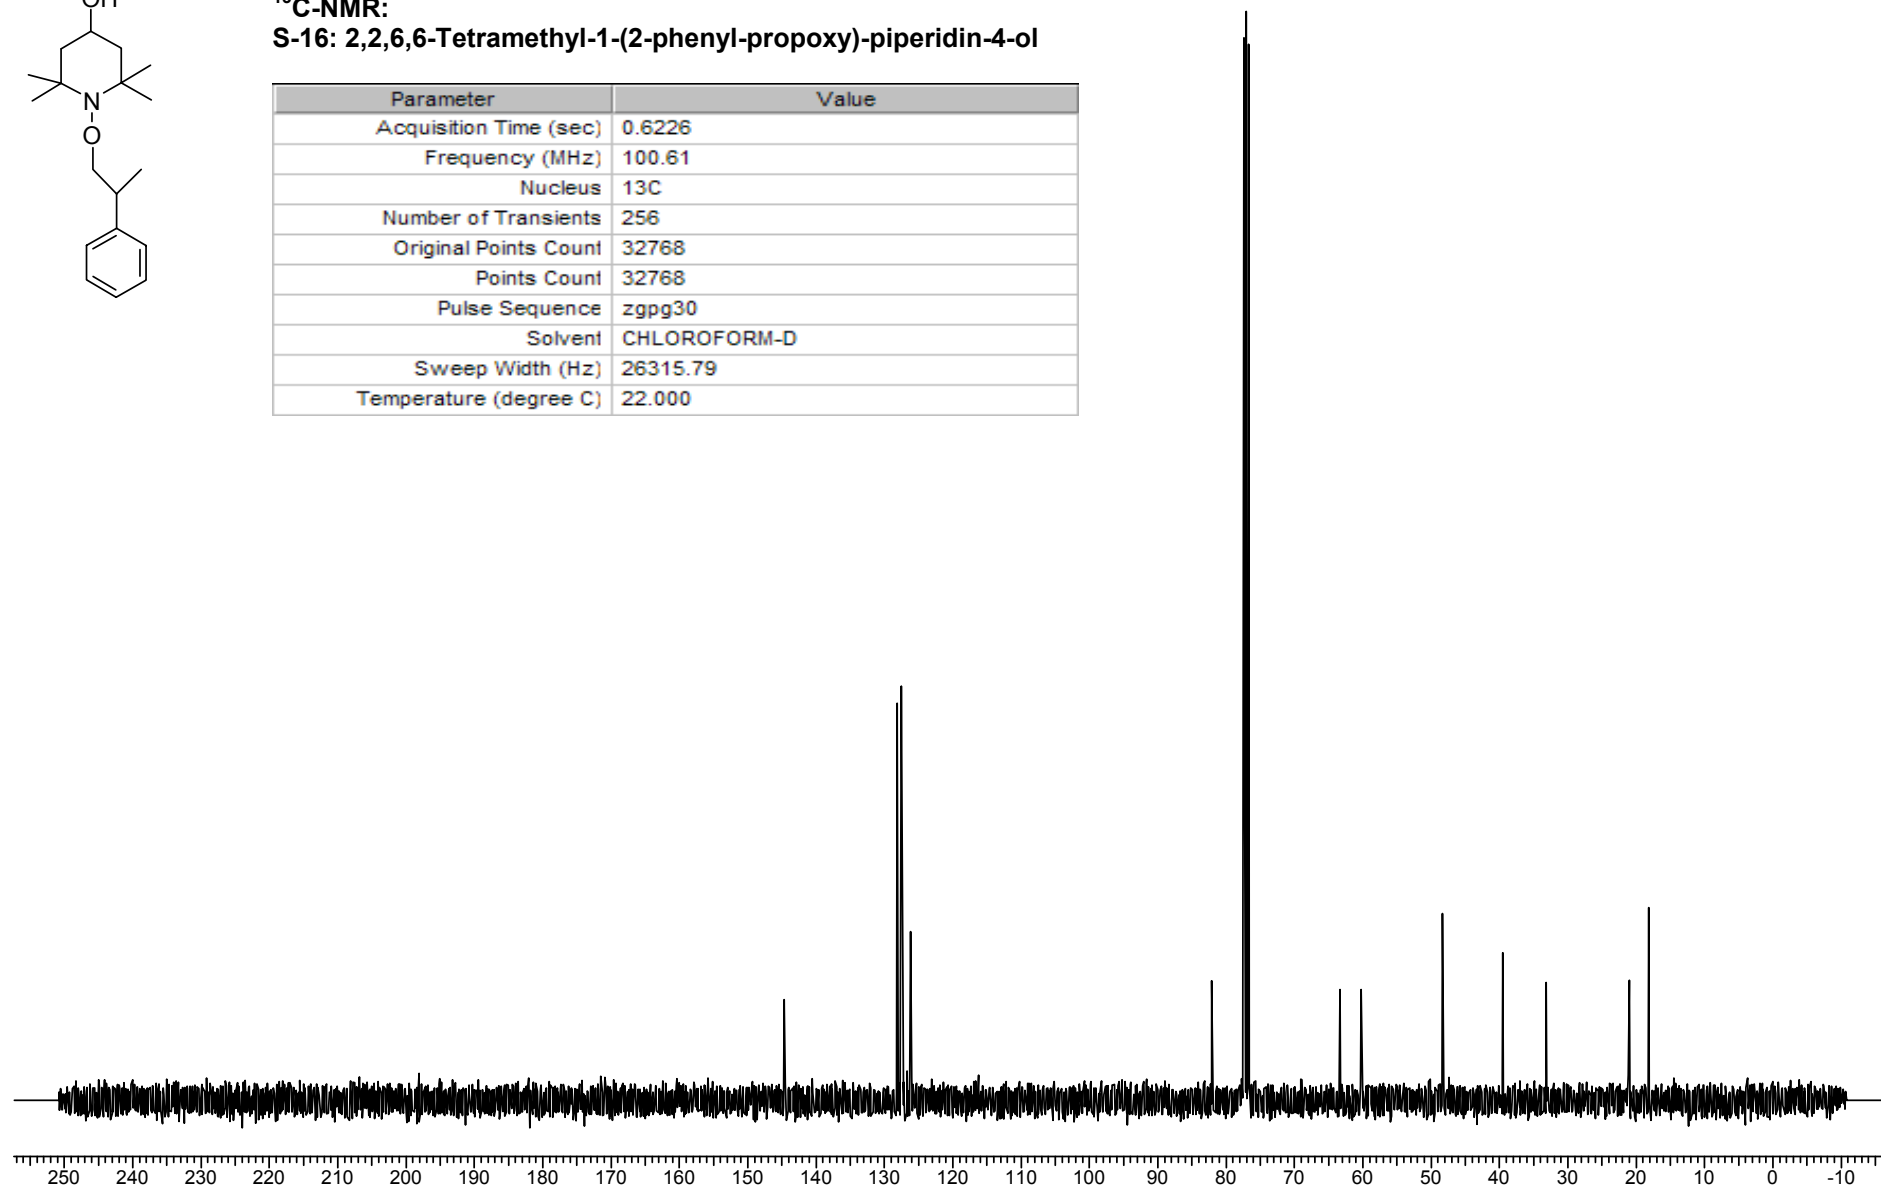

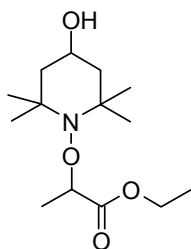**<sup>1</sup>H-NMR****S-17: 2-(4-Hydroxy-2,2,6,6-tetramethyl-piperidin-1-yloxy)-propionic acid ethyl ester**

| Parameter              | Value          |
|------------------------|----------------|
| Acquisition Time (sec) | 1.9923         |
| Frequency (MHz)        | 400.13         |
| Nucleus                | <sup>1</sup> H |
| Number of Transients   | 16             |
| Original Points Count  | 32768          |
| Points Count           | 32768          |
| Pulse Sequence         | zg30           |
| Solvent                | CHLOROFORM-D   |
| Sweep Width (Hz)       | 8223.68        |
| Temperature (degree C) | 21.800         |

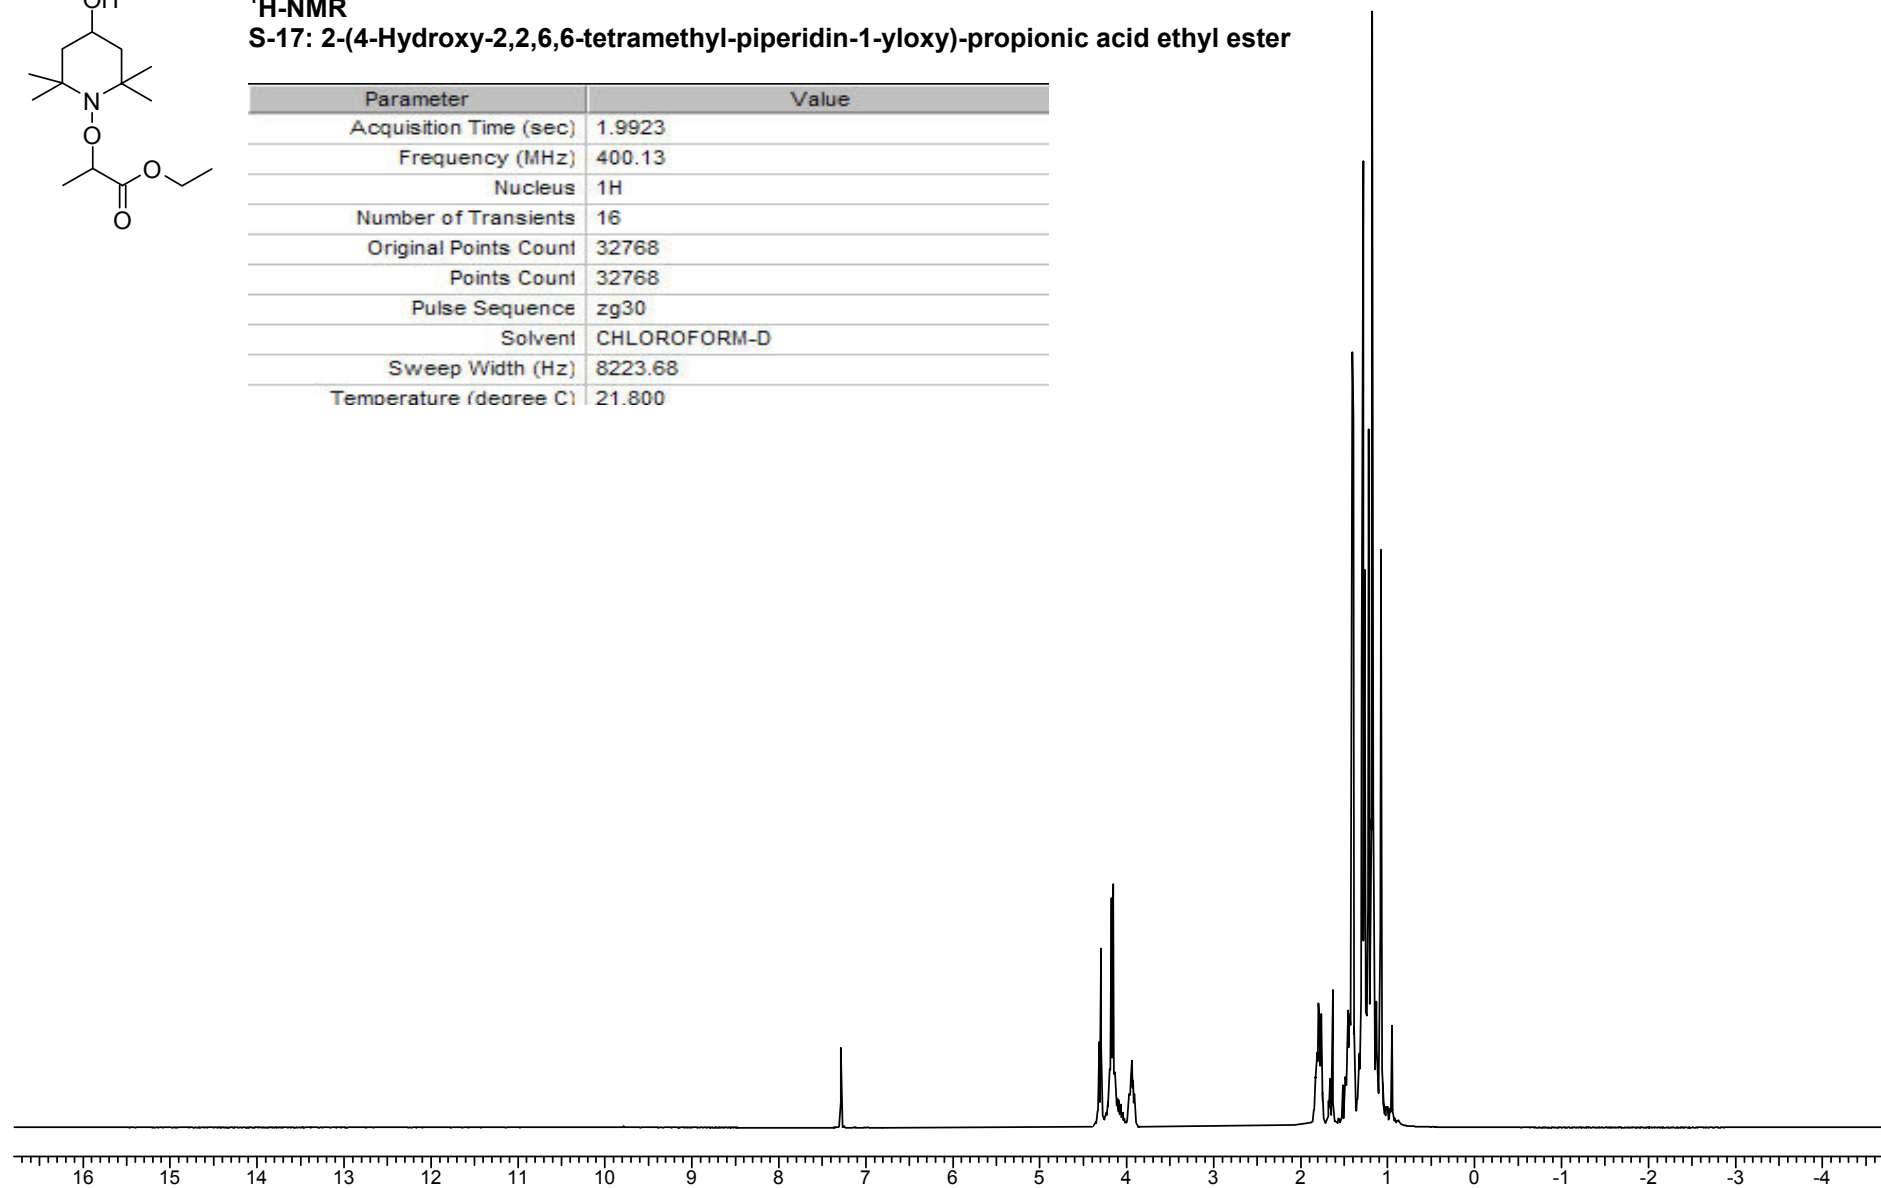

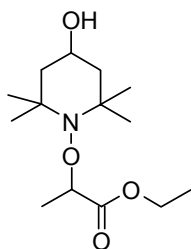**<sup>13</sup>C-NMR****S-17: 2-(4-Hydroxy-2,2,6,6-tetramethyl-piperidin-1-yloxy)-propionic acid ethyl ester**

| Parameter              | Value           |
|------------------------|-----------------|
| Acquisition Time (sec) | 0.6226          |
| Frequency (MHz)        | 100.61          |
| Nucleus                | <sup>13</sup> C |
| Number of Transients   | 256             |
| Original Points Count  | 32768           |
| Points Count           | 32768           |
| Pulse Sequence         | zgpg30          |
| Solvent                | CHLOROFORM-D    |
| Sweep Width (Hz)       | 26315.79        |
| Temperature (degree C) | 22.800          |

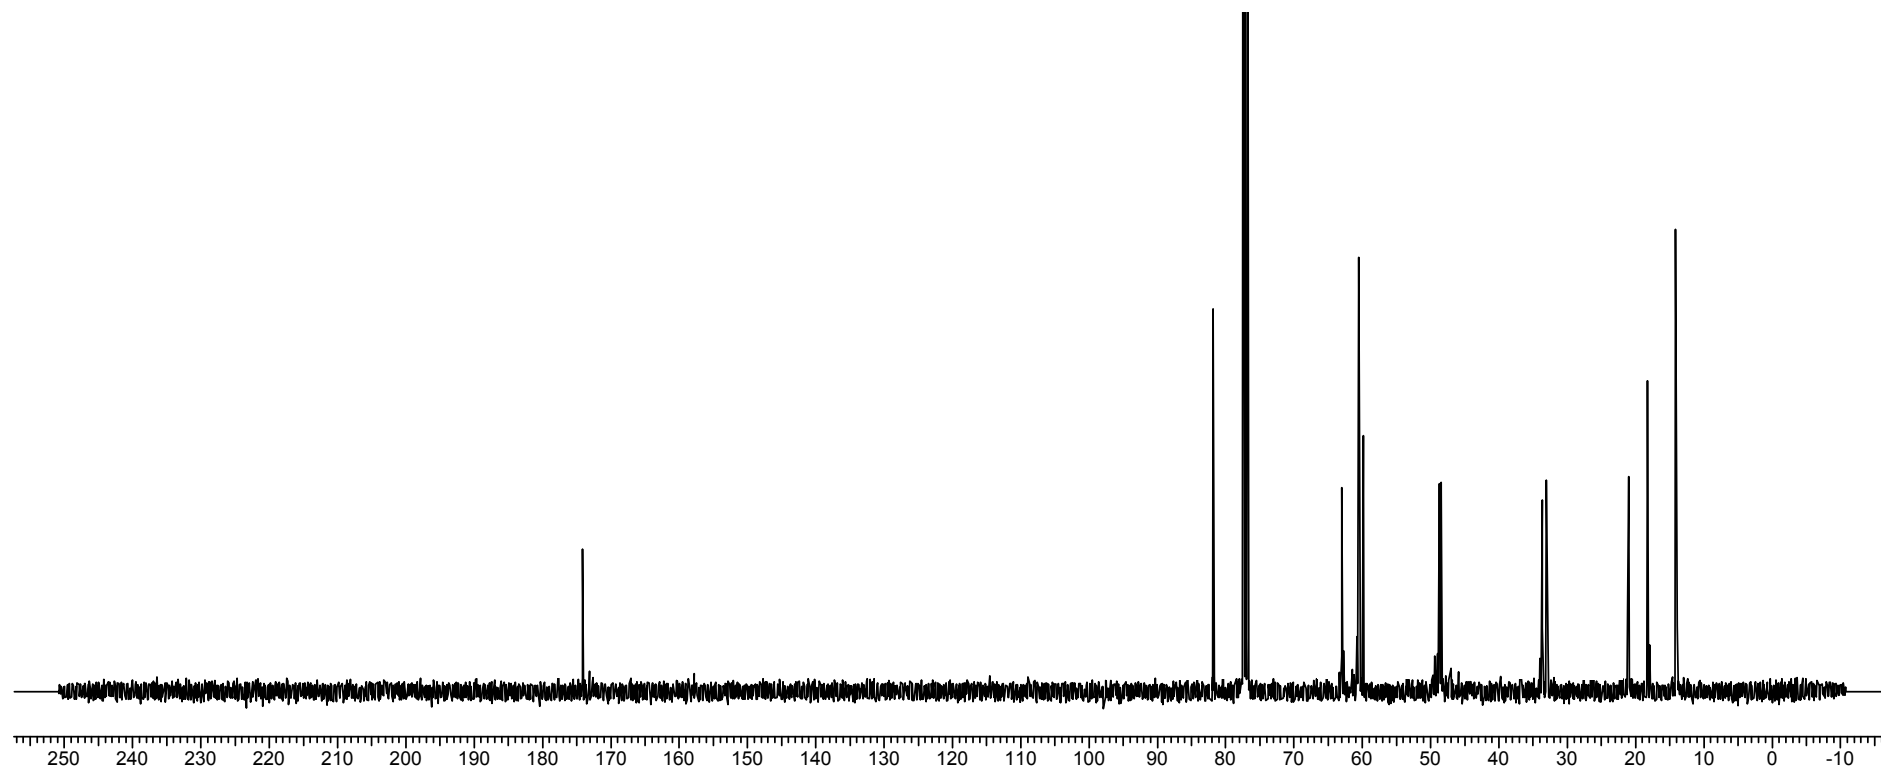

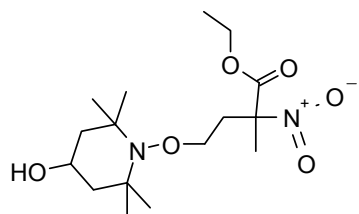**<sup>1</sup>H-NMR****S-18: 4-(4-Hydroxy-2,2,6,6-tetramethyl-piperidin-1-yloxy)-2-methyl-2-nitro-butyrlic acid ethyl ester**

| Parameter              | Value          |
|------------------------|----------------|
| Acquisition Time (sec) | 1.9923         |
| Frequency (MHz)        | 400.13         |
| Nucleus                | <sup>1</sup> H |
| Number of Transients   | 16             |
| Original Points Count  | 32768          |
| Points Count           | 32768          |
| Pulse Sequence         | zg30           |
| Solvent                | CHLOROFORM-D   |
| Sweep Width (Hz)       | 8223.68        |
| Temperature (degree C) | 22.000         |

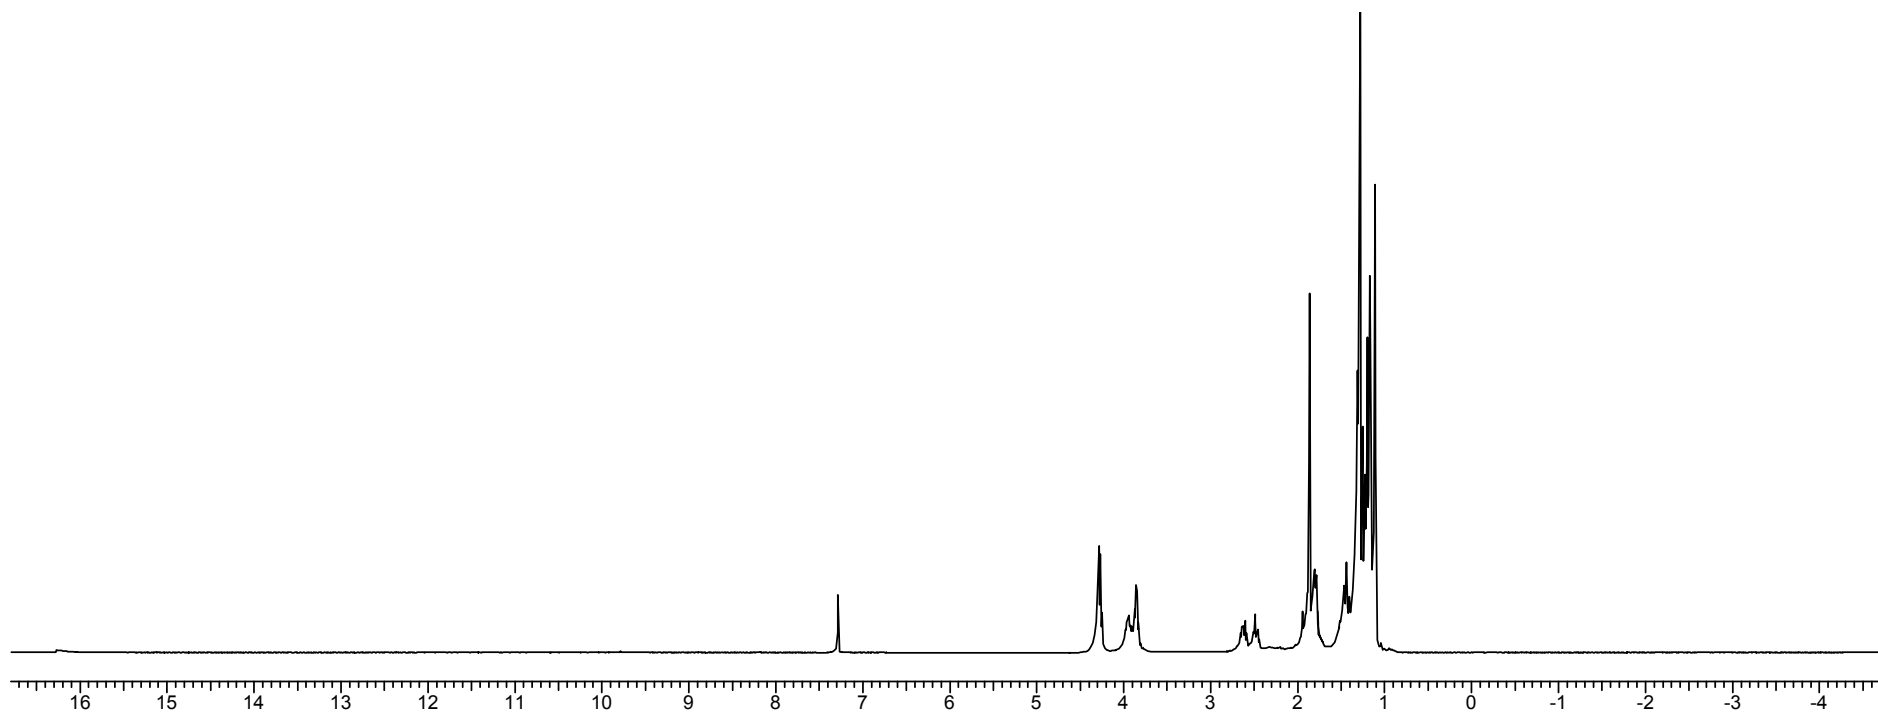

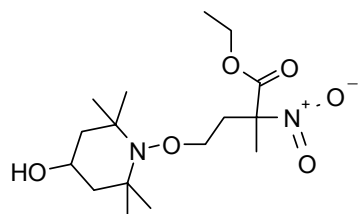**<sup>13</sup>C-NMR****S-18: 4-(4-Hydroxy-2,2,6,6-tetramethyl-piperidin-1-yloxy)-2-methyl-2-nitro-butyrlic acid ethyl ester**

| Parameter              | Value        |
|------------------------|--------------|
| Acquisition Time (sec) | 0.6226       |
| Frequency (MHz)        | 100.61       |
| Nucleus                | 13C          |
| Number of Transients   | 1024         |
| Original Points Count  | 32768        |
| Points Count           | 32768        |
| Pulse Sequence         | zgpg30       |
| Solvent                | CHLOROFORM-D |
| Sweep Width (Hz)       | 26315.79     |
| Temperature (degree C) | 22.000       |

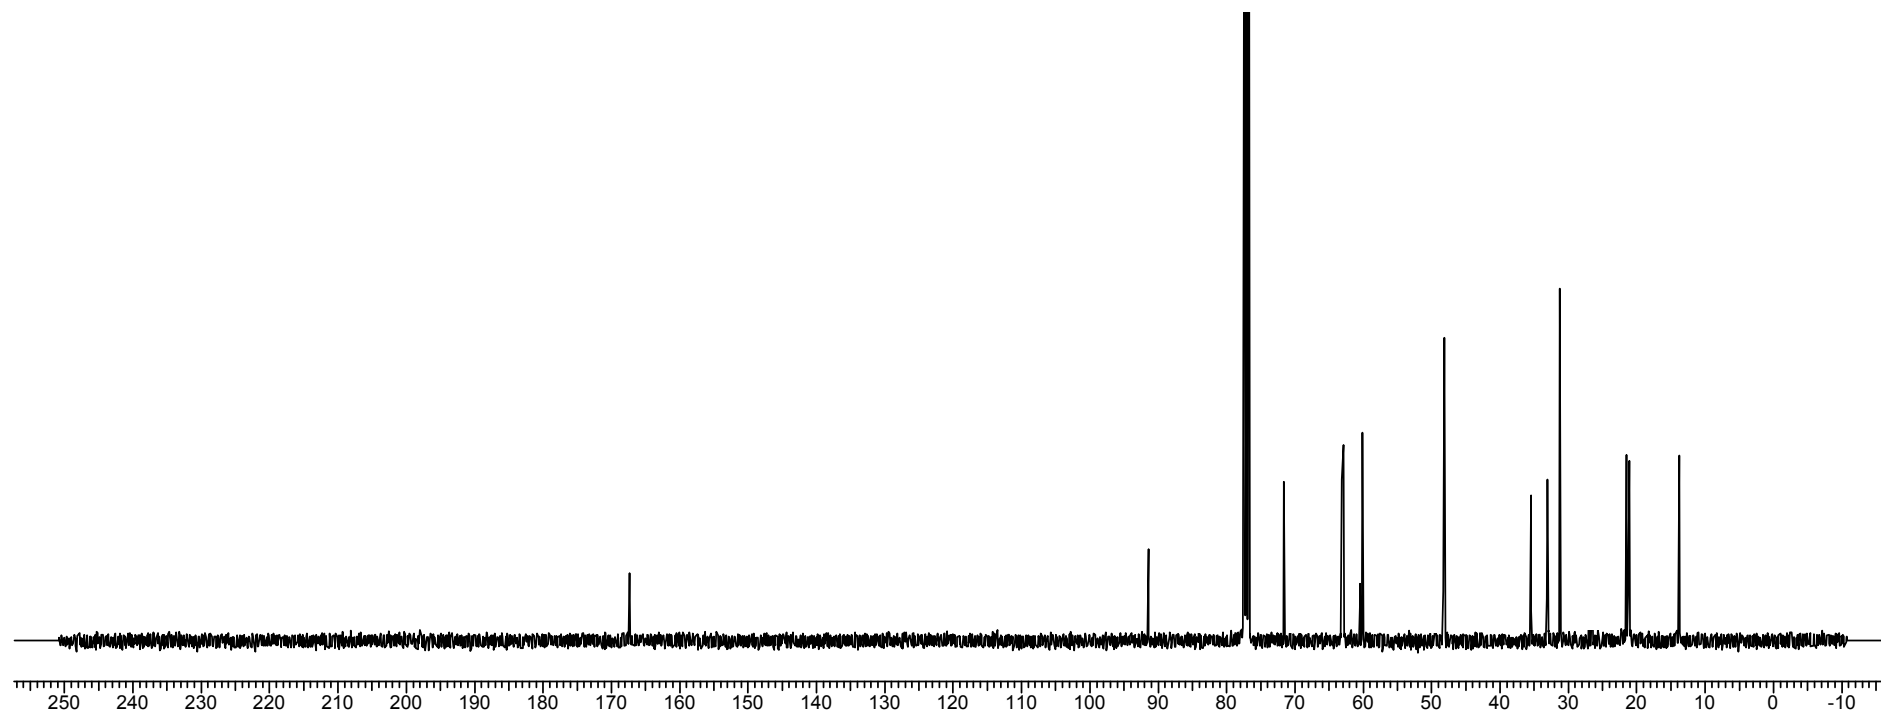

AD\_PROT16 CDC13

7.280

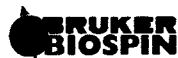

Current Data Parameters  
NAME 20060418-3-24  
EXPNO 1  
PROCNO 1

F2 - Acquisition Parameters  
Date\_ 20060418  
Time 16.42  
INSTRUM dpx300  
PROBHD 5 mm QNP 1H/13  
PULPROG zg30  
TD 65536  
SOLVENT CDC13  
NS 16  
DS 2  
SWH 6172.839 Hz  
FIDRES 0.094190 Hz  
AQ 5.3084660 sec  
RG 128  
DW 81.000 usec  
DE 6.50 usec  
TE 0.0 K  
D1 1.00000000 sec  
MCREST 0.00000000 sec  
MCWRK 0.01500000 sec

===== CHANNEL f1 =====  
NUC1 1H  
P1 7.40 usec  
PL1 -6.00 dB  
SFO1 300.1318008 MHz

F2 - Processing parameters  
SI 32768  
SF 300.1300000 MHz  
WDW EM  
SSB 0  
LB 0.30 Hz  
GB 0  
PC 1.00

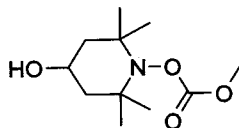

S-19

4.048  
4.020  
4.006  
3.992  
3.968  
3.819  
3.815  
3.805

1.916  
1.911  
1.902  
1.897  
1.879  
1.874  
1.865  
1.859  
1.823  
1.706  
1.667  
1.641  
1.627  
1.353  
1.274  
1.208  
1.145  
1.083

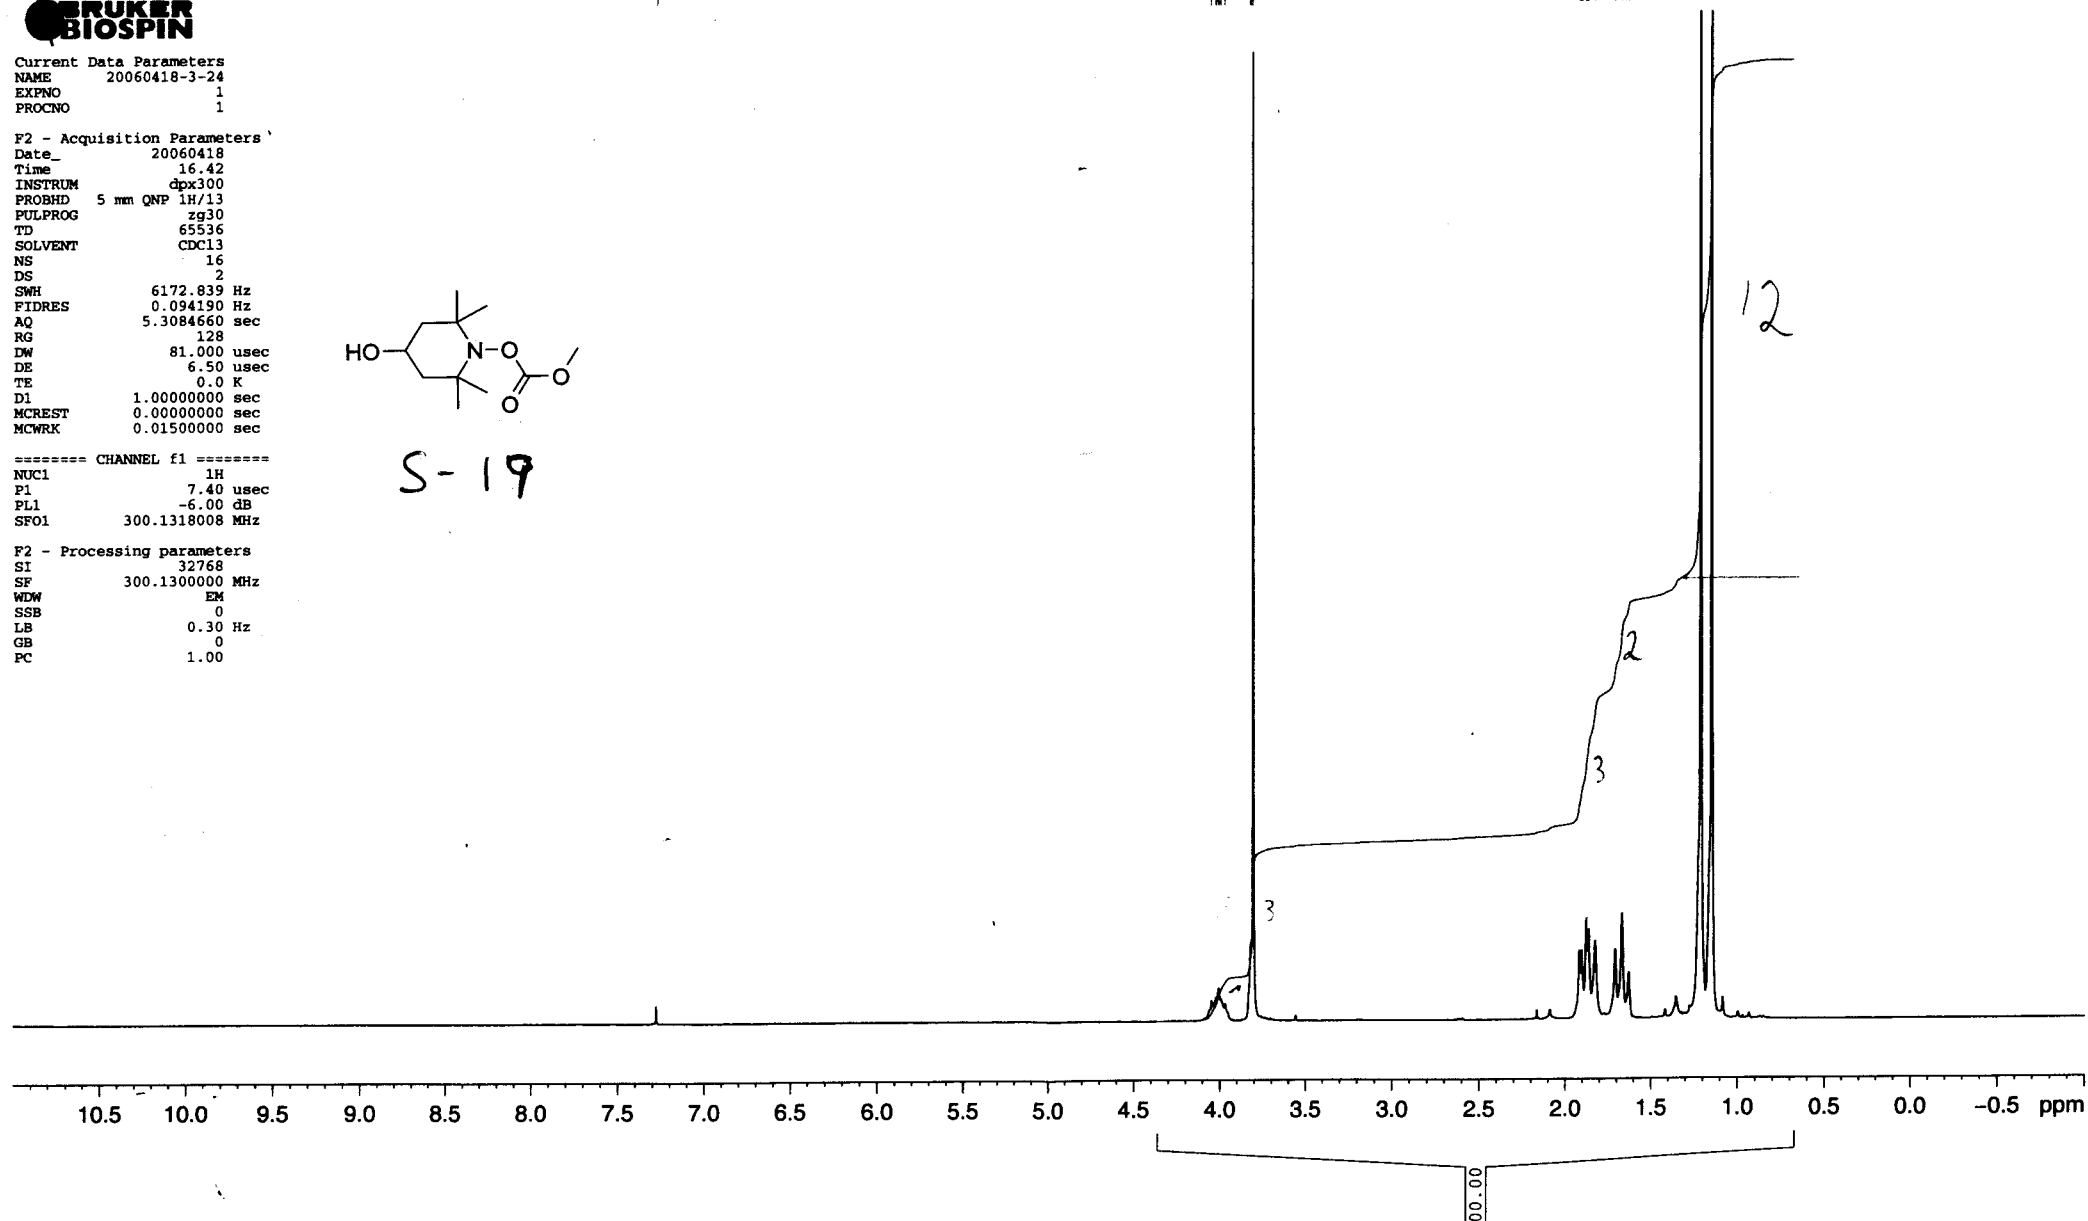

AD\_C13PD2k CDCl<sub>3</sub>

157.64

**BRUKER  
BIOSPIN**

Current Data Parameters  
NAME 20060418-3-24  
EXPNO 2  
PROCNO 1

F2 - Acquisition Parameters  
Date\_ 20060418  
Time 23.28  
INSTRUM dpx300  
PROBHD 5 mm QNP 1H/13  
PULPROG zgpg30  
TD 65536  
SOLVENT CDCl<sub>3</sub>  
NS 2048  
DS 4  
SWH 19723.865 Hz  
FIDRES 0.300962 Hz  
AQ 1.6613876 sec  
RG 812.7  
DW 25.350 usec  
DE 6.50 usec  
TE 0.0 K  
D1 2.00000000 sec  
d11 0.03000000 sec  
MCREST 0.00000000 sec  
MCWRK 0.01500000 sec

===== CHANNEL f1 =====  
NUC1 13C  
P1 5.00 usec  
PL1 -6.00 dB  
SFO1 75.4767751 MHz

===== CHANNEL f2 =====  
CPDPRG2 waltz16  
NUC2 1H  
PCPD2 80.00 usec  
PL2 -6.00 dB  
PL12 16.70 dB  
PL13 19.70 dB  
SFO2 300.1312005 MHz

F2 - Processing parameters  
SI 32768  
SF 75.4677190 MHz  
WDW EM  
SSB 0  
LB 1.00 Hz  
GB 0  
PC 1.40

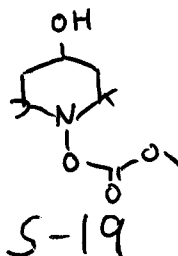

77.86  
77.44  
77.02  
63.13  
61.13  
55.46  
48.10  
31.96  
21.64

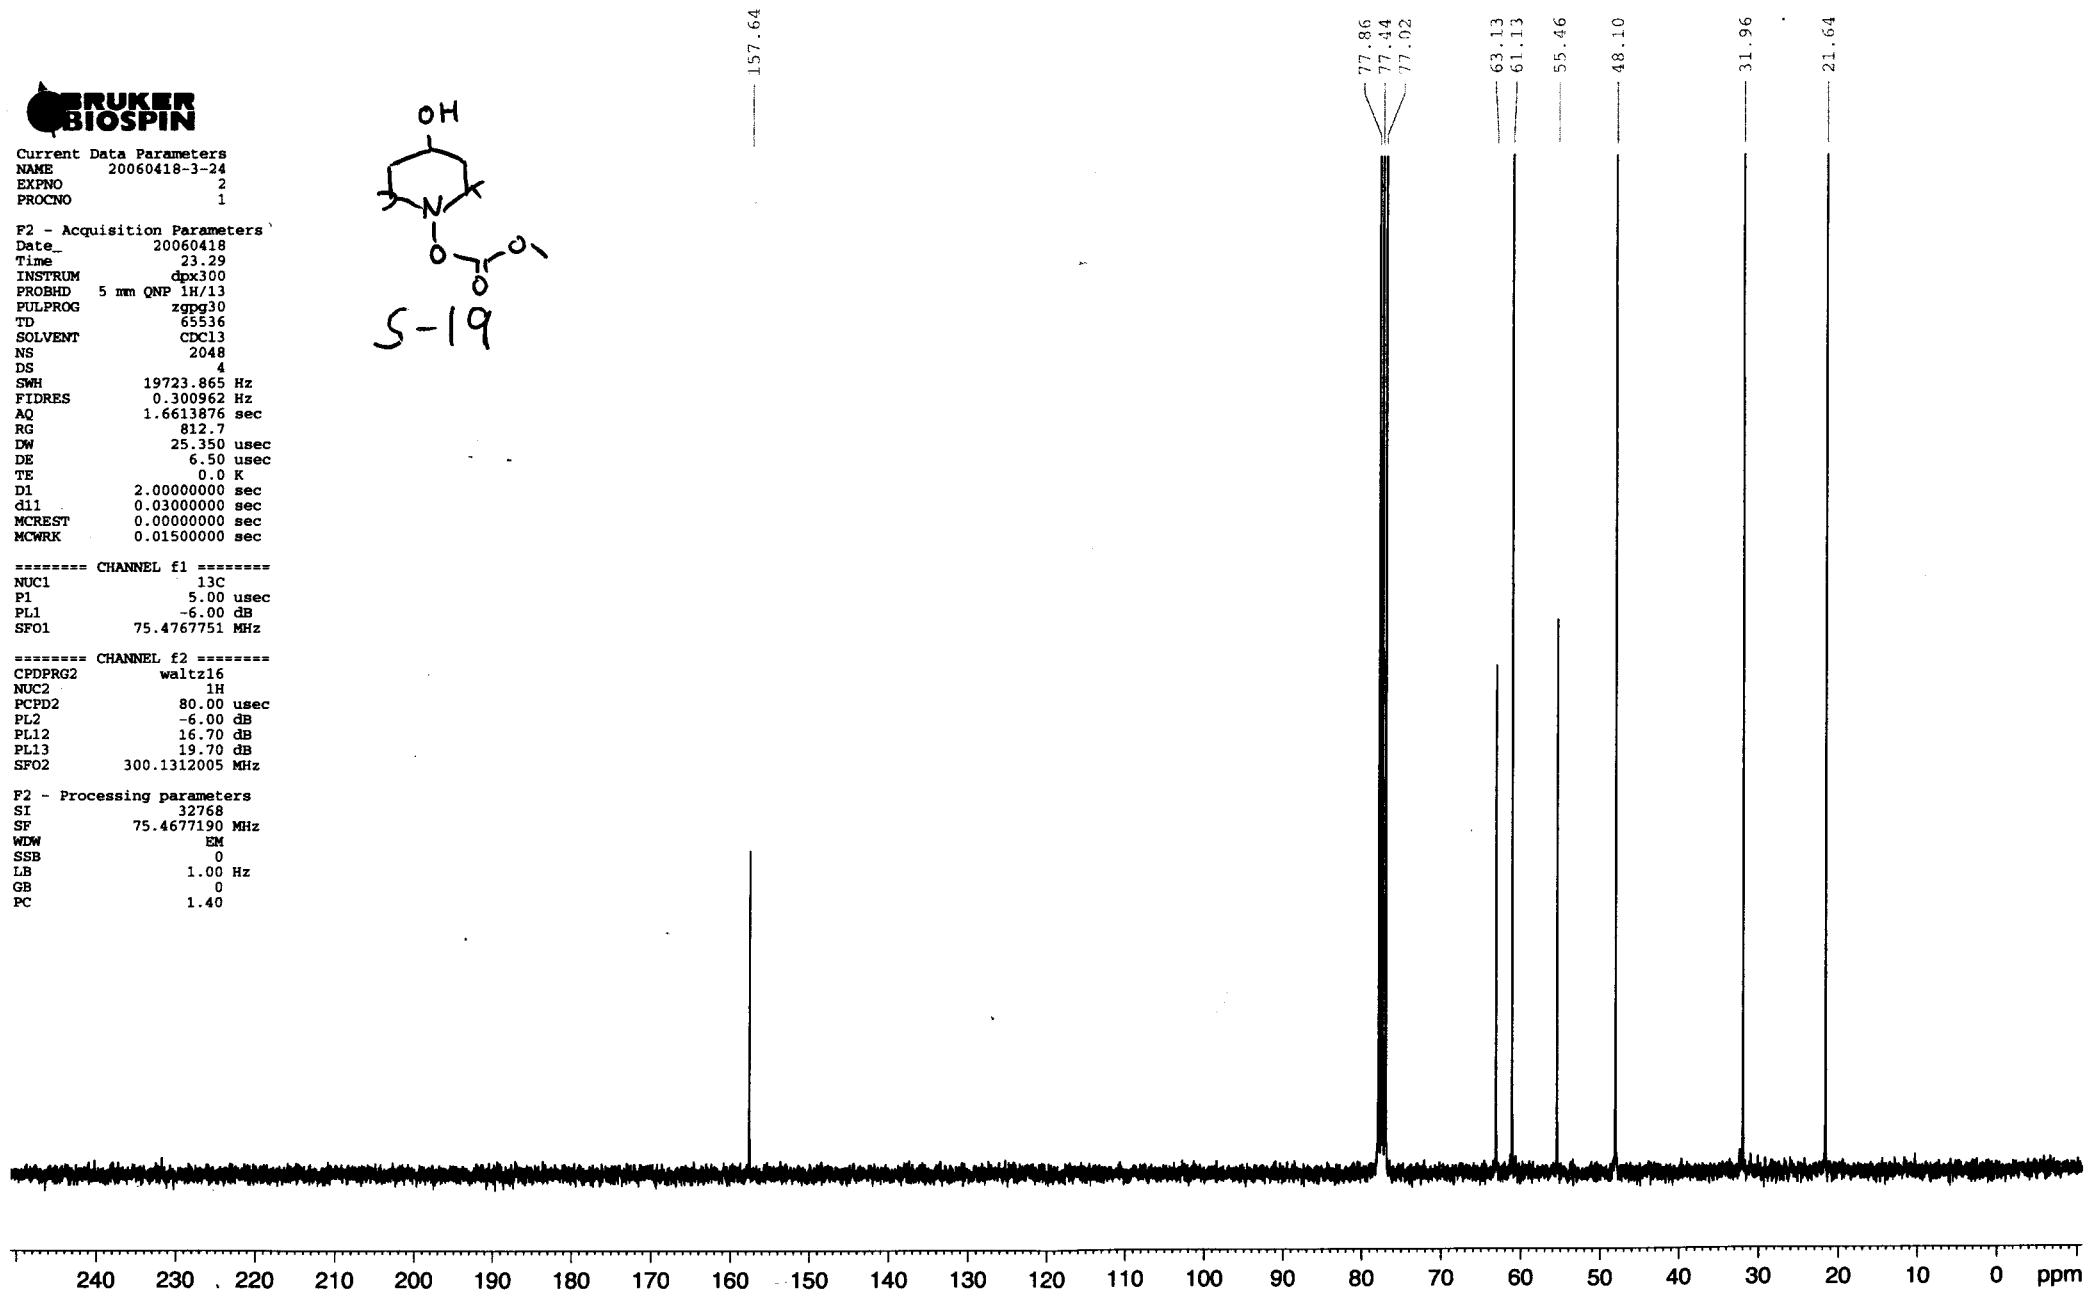

AD\_PROT16 CDC13:

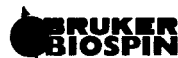

Current Data Parameters  
NAME 20060523-4-23  
EXPNO 1  
PROCNO 1

F2 - Acquisition Parameters  
Date\_ 20060523  
Time 8.13  
INSTRUM dpx400  
PROBHD 5 mm QNP 1H/15  
PULPROG zg30  
TD 65536  
SOLVENT CDC13  
NS 16  
DS 2  
SWH 8223.685 Hz  
FIDRES 0.125483 Hz  
AQ 3.9846387 sec  
RG 64  
DW 60.800 usec  
DE 7.50 usec  
TE 297.0 K  
D1 1.00000000 sec  
MCREST 0.00000000 sec  
MCWRK 0.01500000 sec

===== CHANNEL f1 =====  
NUC1 1H  
P1 8.20 usec  
PL1 -2.00 dB  
SFO1 400.1324008 MHz

F2 - Processing parameters  
SI 32768  
SF 400.1300000 MHz  
WDW EM  
SSB 0  
LB 0.30 Hz  
GB 0  
PC 1.00

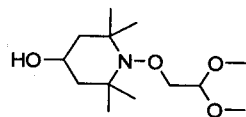

S-20

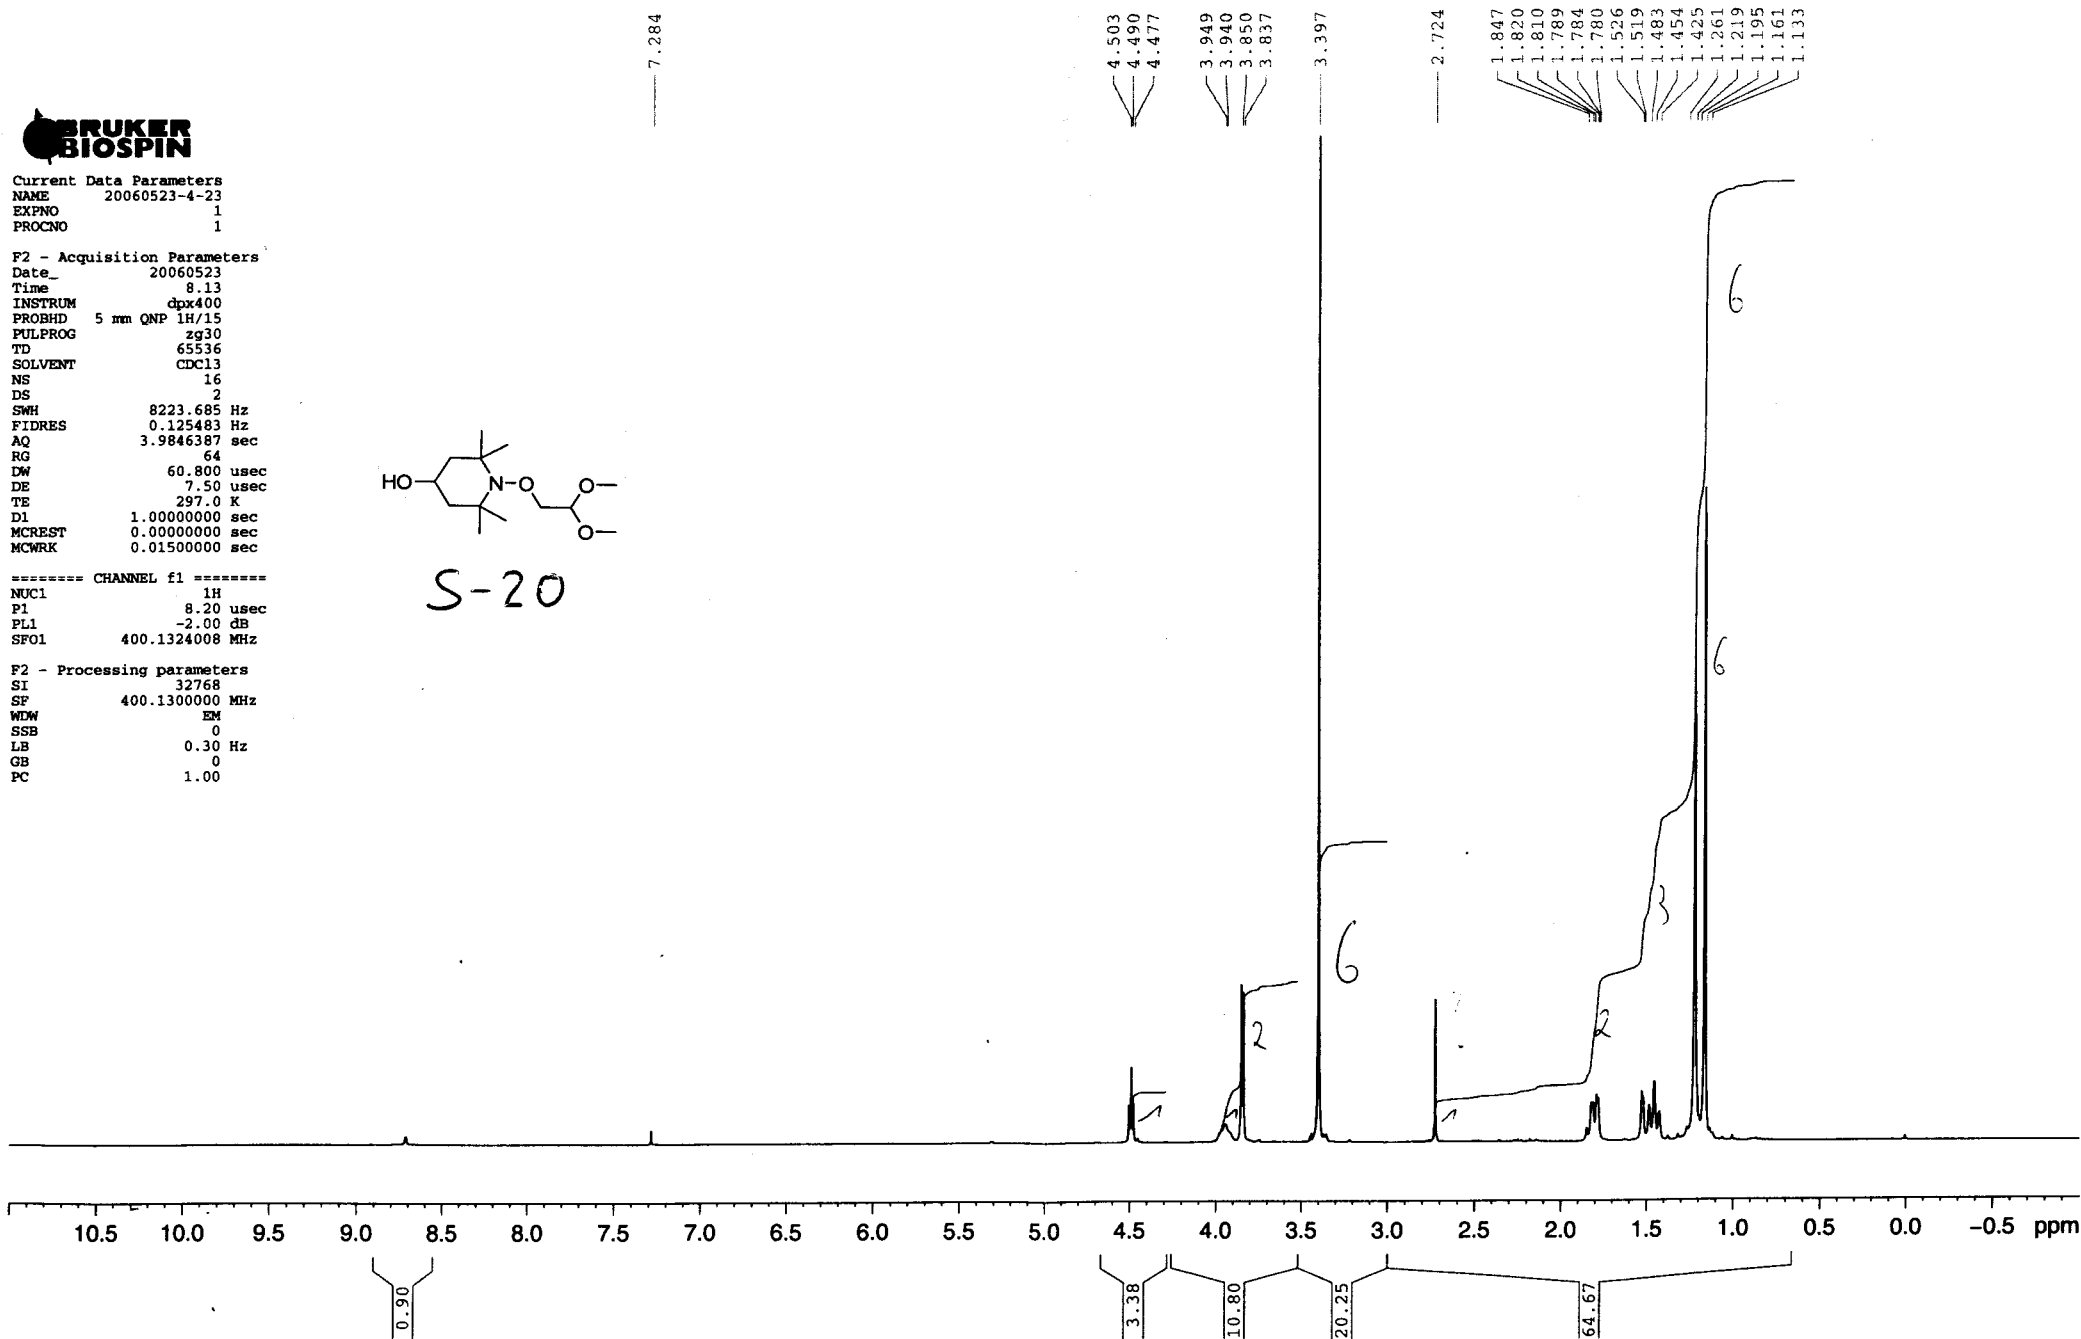

p60

AD\_C13PD256 CDC13 x

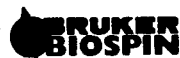

Current Data Parameters  
NAME 20060523-4-23  
EXPNO 2  
PROCNO 1

F2 - Acquisition Parameters  
Date\_ 20060523  
Time 8.29  
INSTRUM dpx400  
PROBHD 5 mm QNP 1H/13  
PULPROG zgpg30  
TD 65536  
SOLVENT CDC13  
NS 256  
DS 4  
SWH 26315.789 Hz  
FIDRES 0.401547 Hz  
AQ 1.2452340 sec  
RG 13004  
DW 19.000 usec  
DE 10.00 usec  
TE 297.0 K  
D1 2.00000000 sec  
d11 0.03000000 sec  
MCREST 0.00000000 sec  
MCWRK 0.01500000 sec

\*\*\*\*\* CHANNEL f1 \*\*\*\*\*  
NUC1 13C  
P1 6.10 usec  
PL1 -2.00 dB  
SFO1 100.6248421 MHz

\*\*\*\*\* CHANNEL f2 \*\*\*\*\*  
CPDPRG2 waltz16  
NUC2 1H  
PCPD2 80.00 usec  
PL2 -2.00 dB  
PL12 20.00 dB  
PL13 23.00 dB  
SFO2 400.1316005 MHz

F2 - Processing parameters  
SI 32768  
SF 100.6127690 MHz  
WDW EM  
SSB 0  
LB 1.00 Hz  
GB 0  
PC 1.40

S-20

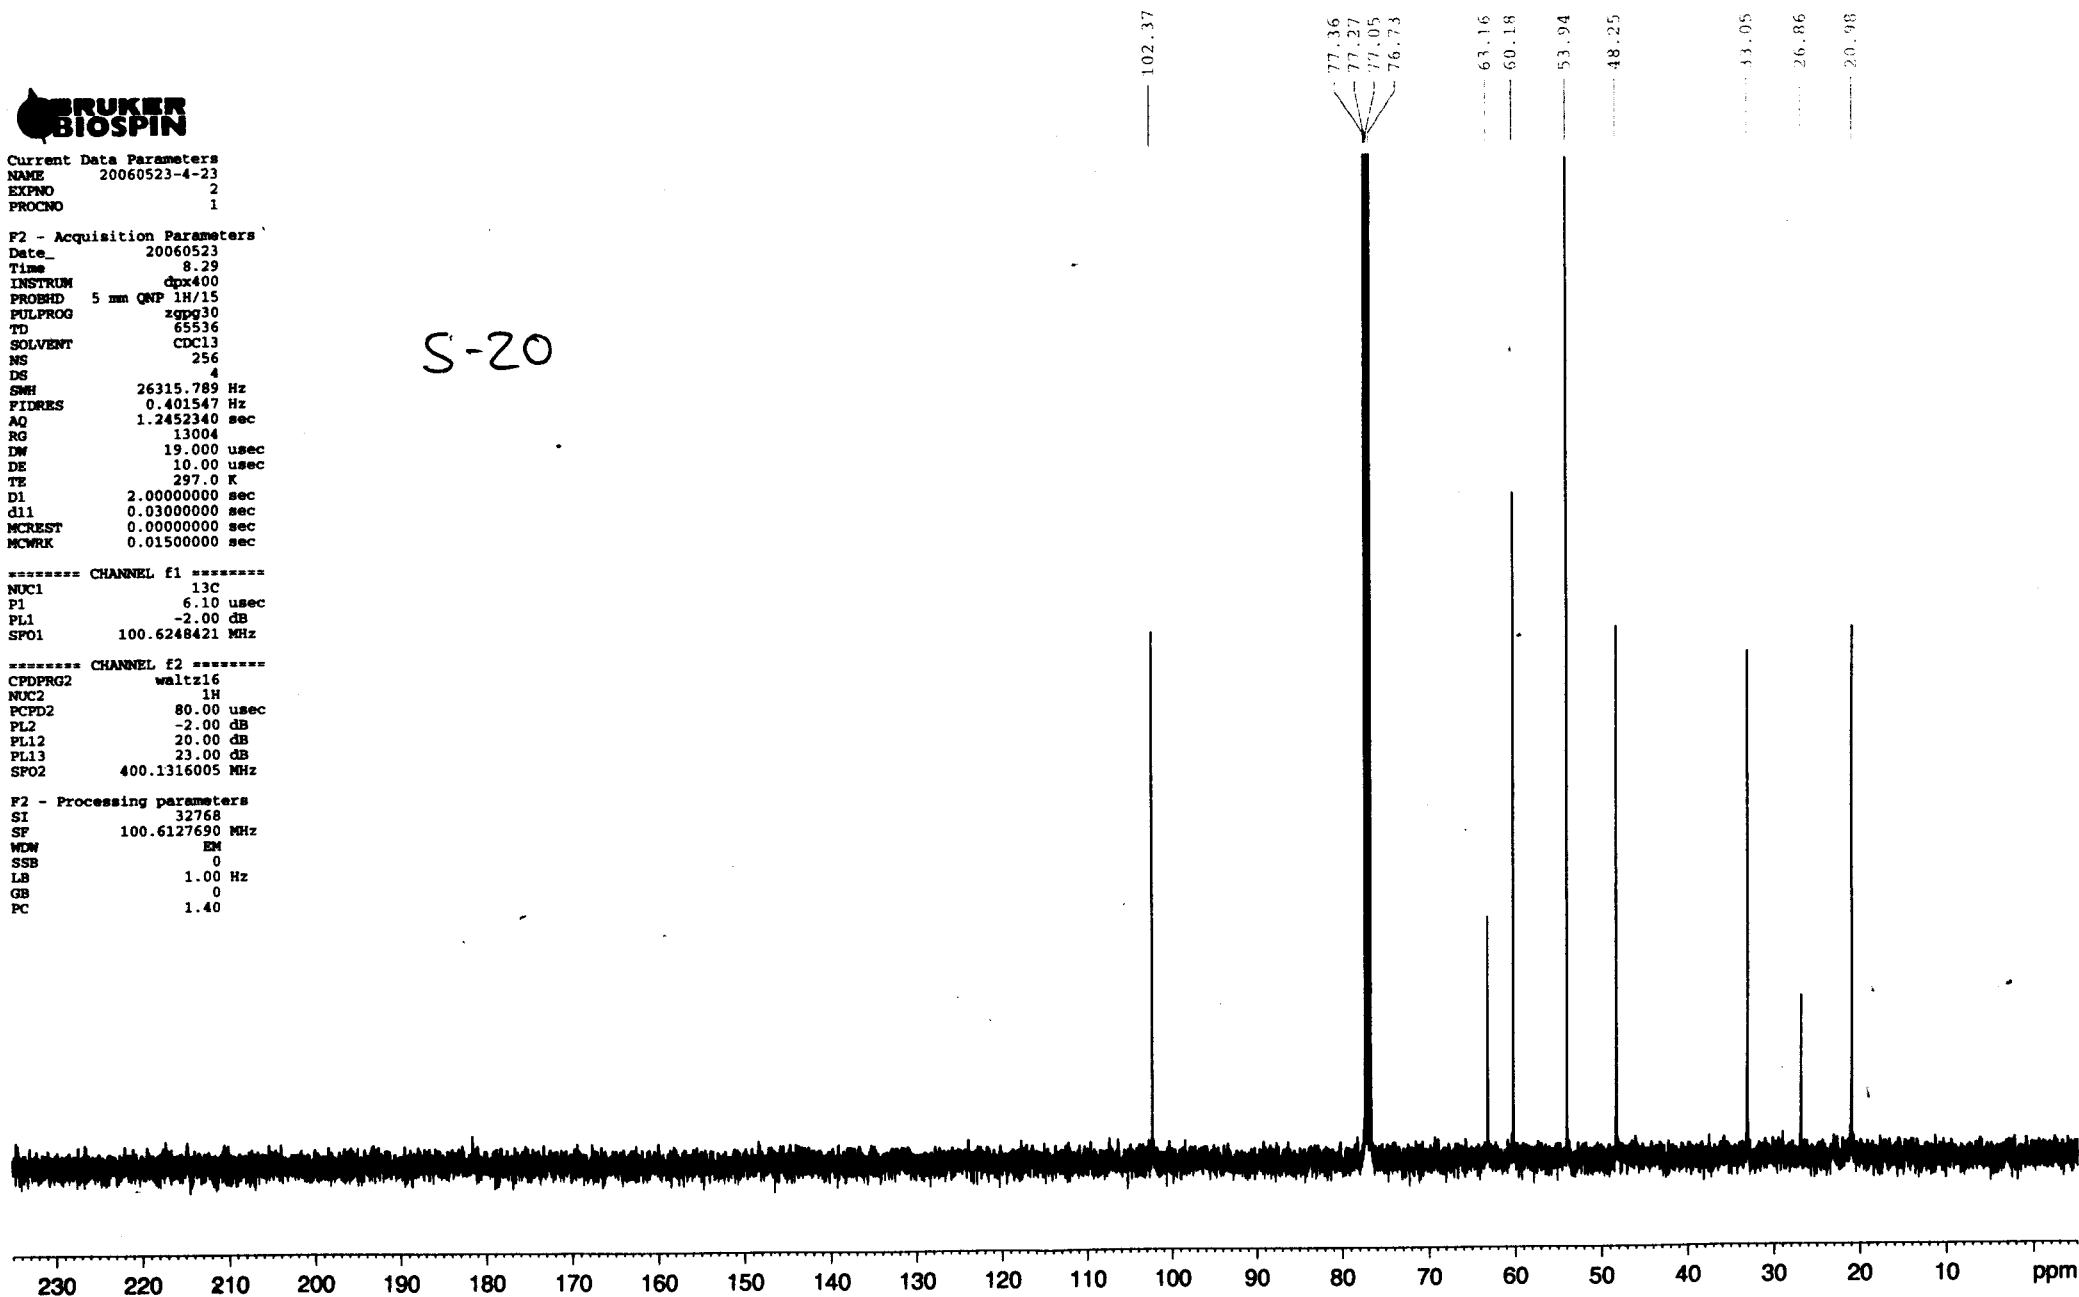

p61

AD\_PROT16 CDCl3 x

**BRUKER  
BIOSPIN**

Current Data Parameters  
NAME 20060725-4-4  
EXPNO 1  
PROCNO 1

F2 - Acquisition Parameters  
Date\_ 20060725  
Time 11.54  
INSTRUM dpx400  
PROBHD 5 mm QNP 1H/15  
PULPROG zg30  
TD 65536  
SOLVENT CDCl3  
NS 16  
DS 2  
SWH 8223.685 Hz  
FIDRES 0.125483 Hz  
AQ 3.9846387 sec  
RG 90.5  
DW 60.800 usec  
DE 7.50 usec  
TE 298.6 K  
D1 1.00000000 sec  
MCREST 0.00000000 sec  
MCWRK 0.01500000 sec

===== CHANNEL f1 =====  
NUC1 1H  
P1 8.20 usec  
PL1 -2.00 dB  
SFO1 400.1324008 MHz

F2 - Processing parameters  
SI 32768  
SF 400.1300000 MHz  
WDW EM  
SSB 0  
LB 0.30 Hz  
GB 0  
PC 1.00

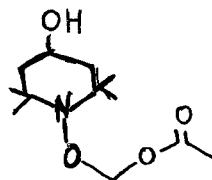

S-21

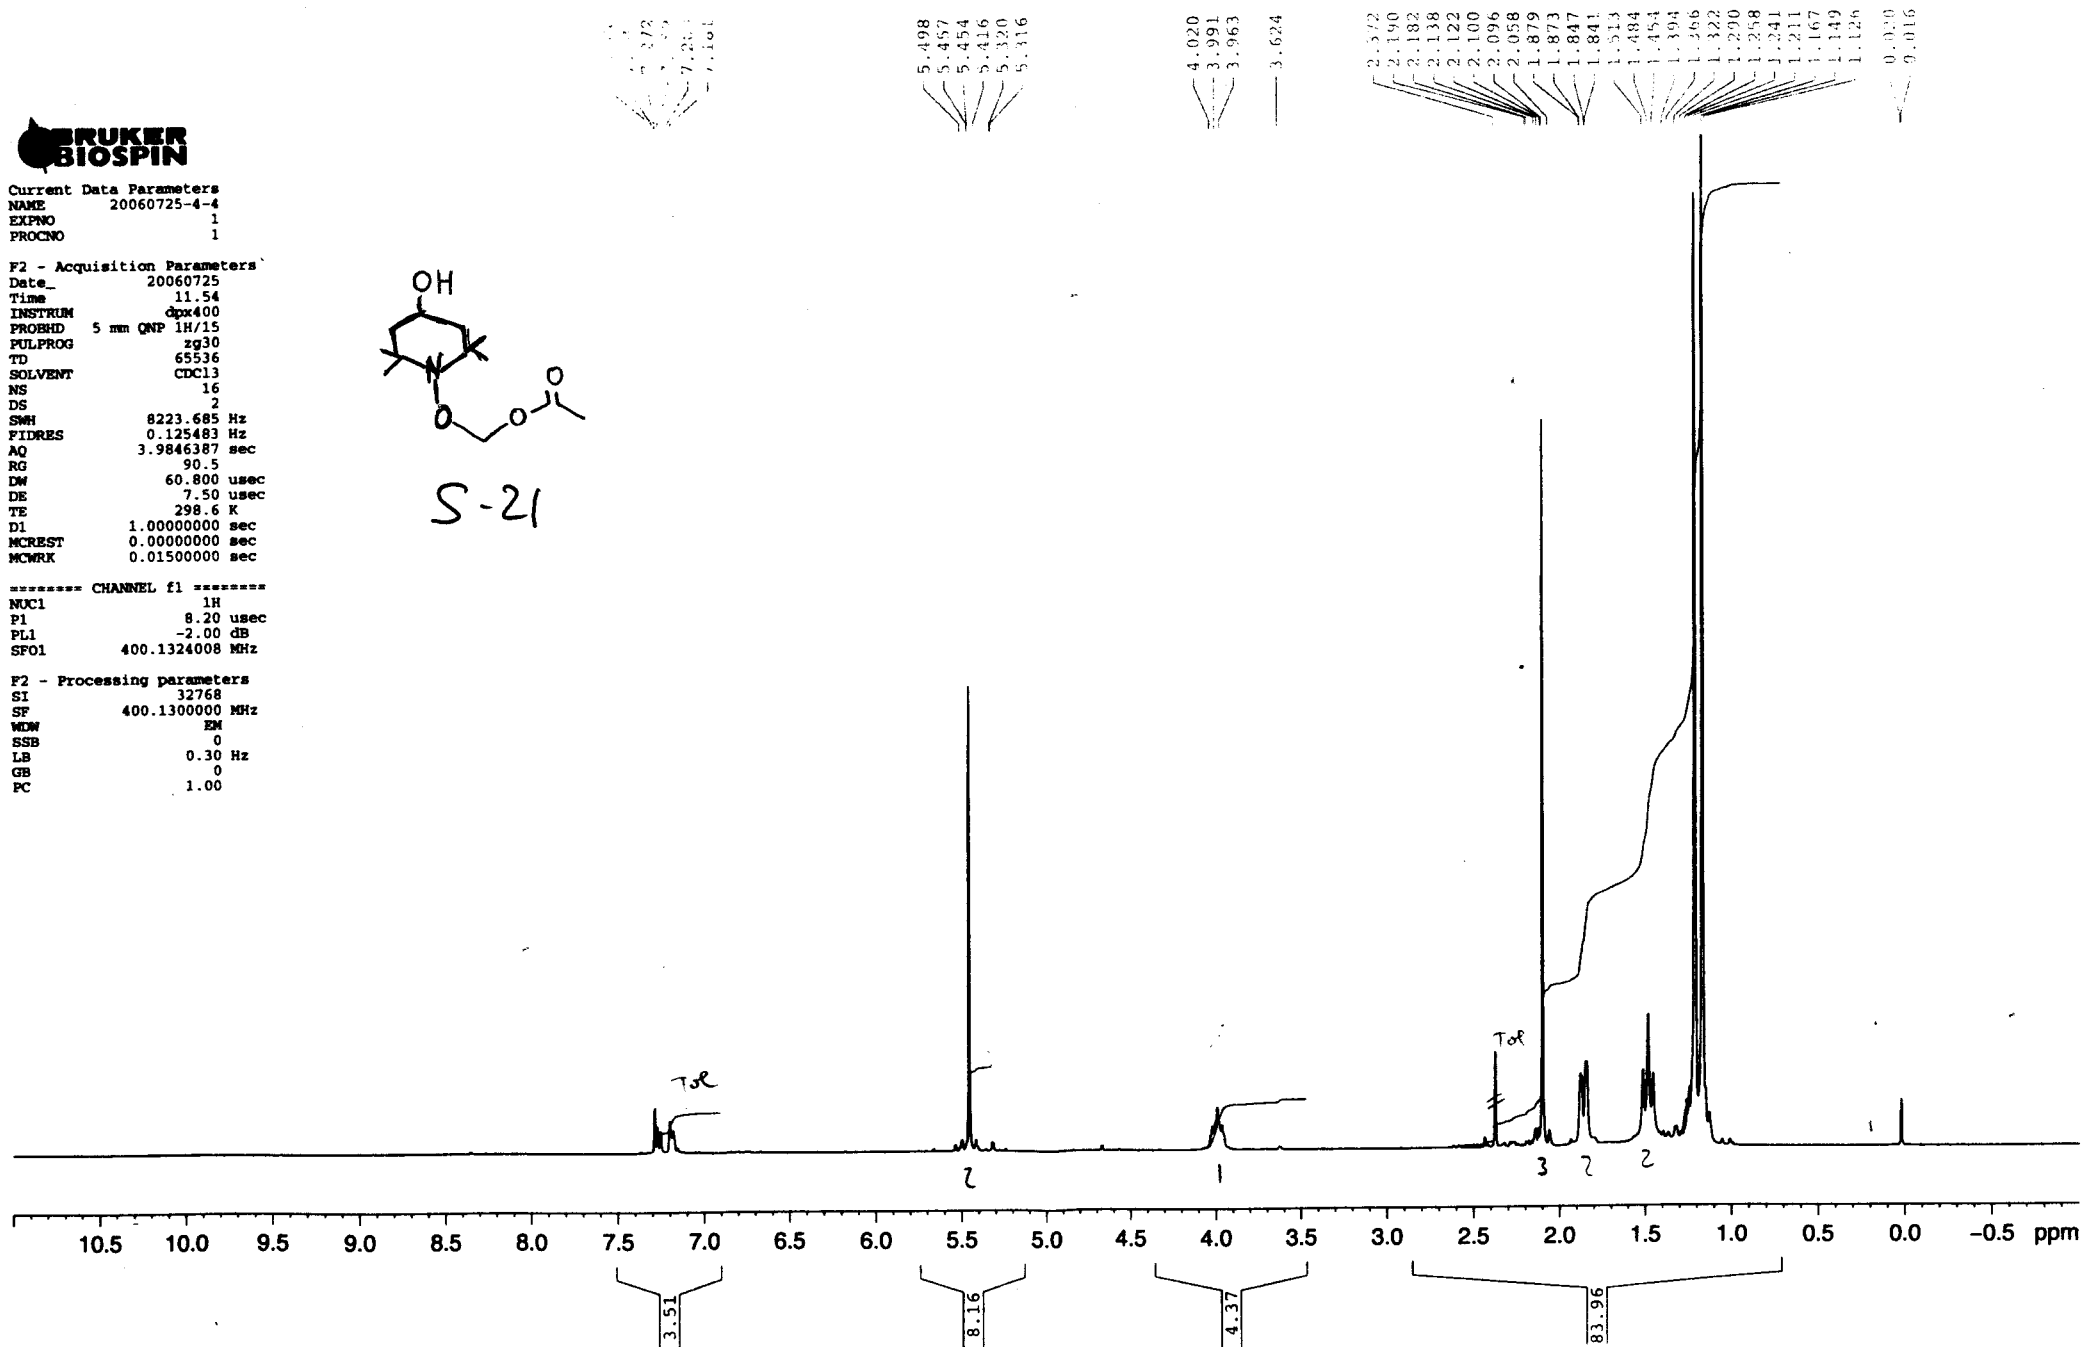

AD\_APTa CDCl3 x

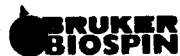

Current Data Parameters  
NAME 20060725-4-7  
EXPNO 1  
PROCNO 1

F2 - Acquisition Parameters  
Date\_ 20060725  
Time 14.22  
INSTRUM dpx400  
PROBHD 5 mm QNP 1H/15  
PULPROG jmod  
TD 65536  
SOLVENT CDCl3  
NS 256  
DS 4  
SWH 26315.789 Hz  
FIDRES 0.401547 Hz  
AQ 1.2452340 sec  
RG 2580.3  
DW 19.000 usec  
DE 10.00 usec  
TE 299.4 K  
CNST2 145.0000000  
CNST11 1.0000000  
D1 2.00000000 sec  
d20 0.00689655 sec  
DELTA 0.00000777 sec  
NCREST 0.00000000 sec  
MCWRR 0.01500000 sec

----- CHANNEL f1 -----  
NUC1 13C  
P1 6.10 usec  
p2 12.20 usec  
PL1 -2.00 dB  
SFO1 100.6248421 MHz

----- CHANNEL f2 -----  
CPDPRG2 waltz16  
NUC2 1H  
PCPD2 80.00 usec  
PL2 -2.00 dB  
PL12 20.00 dB  
SFO2 400.1316005 MHz

F2 - Processing parameters  
SI 32768  
SF 100.6127690 MHz  
WDW EM  
SSB 0  
LB 1.00 Hz  
GB 0  
PC 1.40

S-21

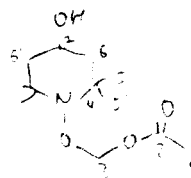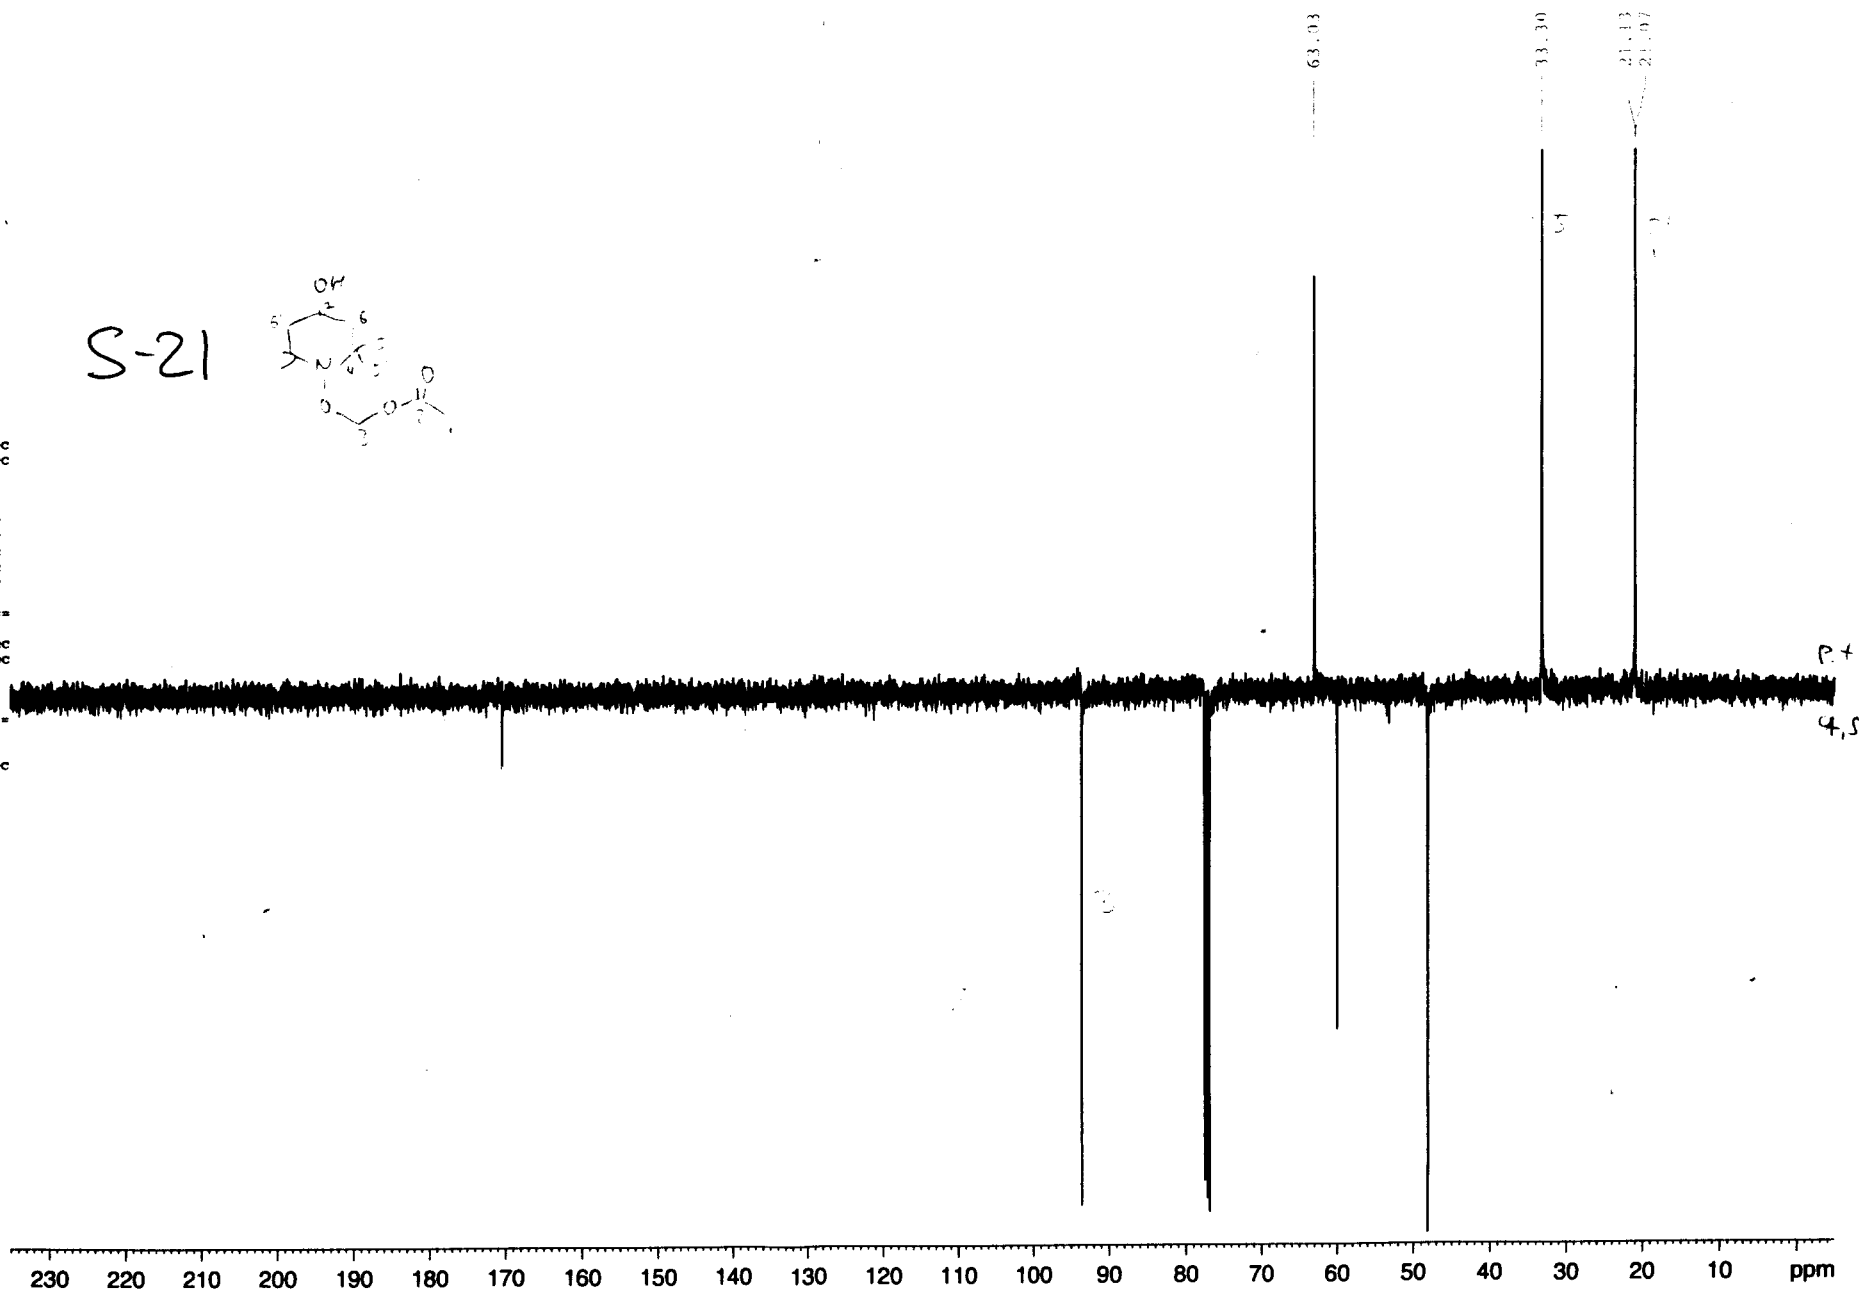

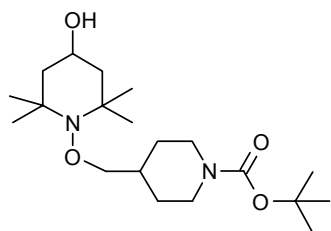**<sup>1</sup>H-NMR****S-22: 4-(4-Hydroxy-2,2,6,6-tetramethyl-piperidin-1-yloxymethyl)-piperidine-1-carboxylic acid tert-butyl ester**

| Parameter              | Value          |
|------------------------|----------------|
| Acquisition Time (sec) | 1.9923         |
| Frequency (MHz)        | 400.13         |
| Nucleus                | <sup>1</sup> H |
| Number of Transients   | 16             |
| Original Points Count  | 32768          |
| Points Count           | 32768          |
| Pulse Sequence         | zg30           |
| Solvent                | CHLOROFORM-D   |
| Sweep Width (Hz)       | 8223.68        |
| Temperature (degree C) | 22.000         |

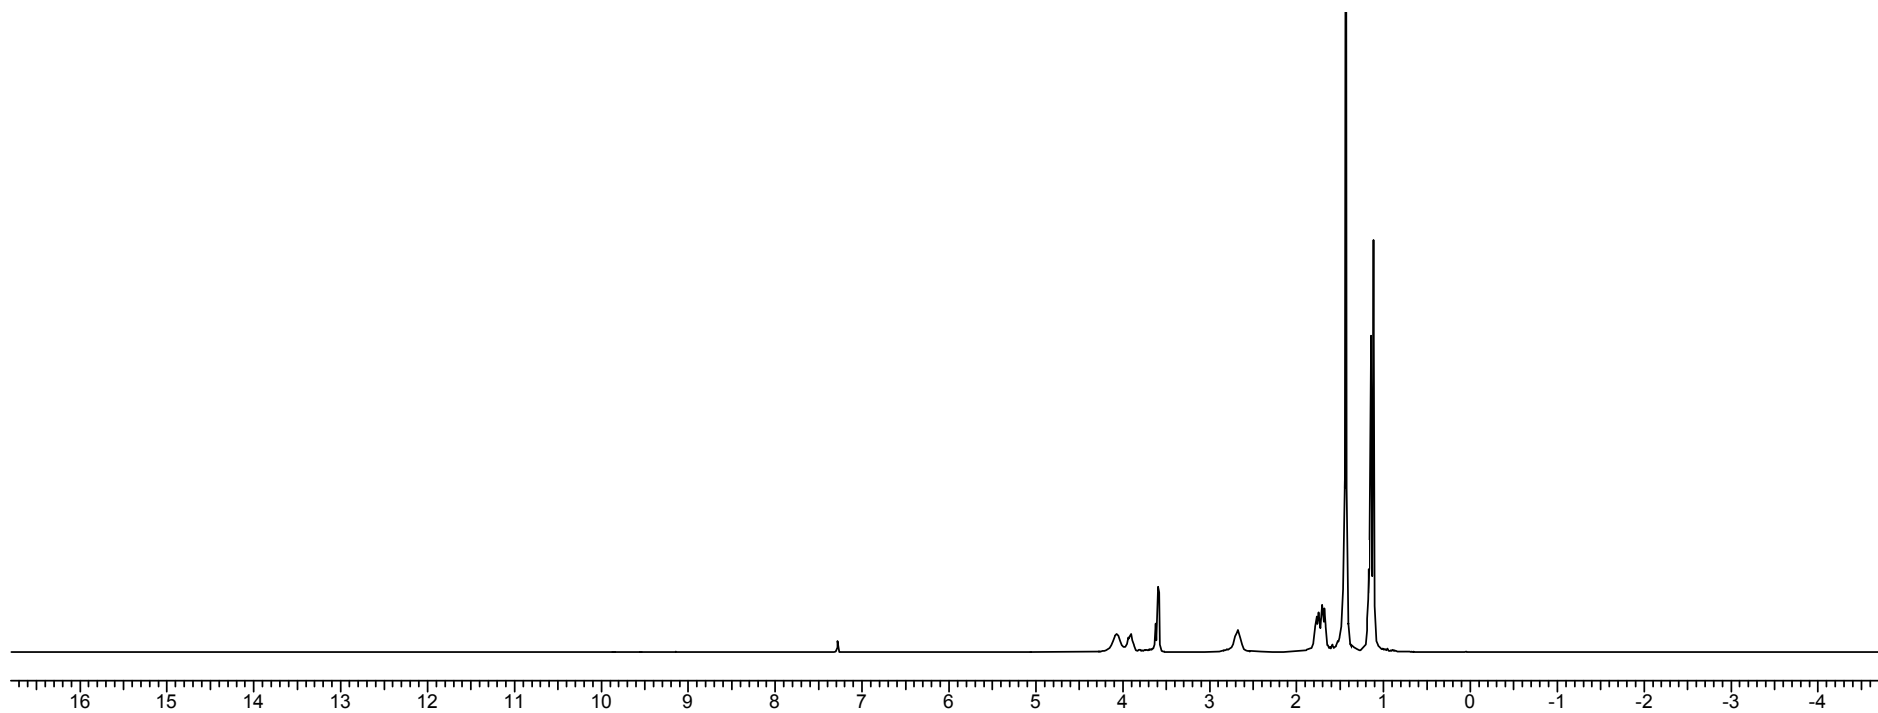

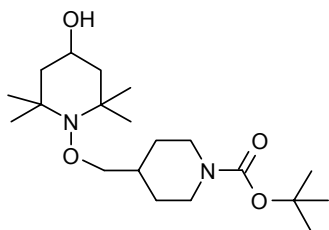**<sup>13</sup>C-NMR****S-22: 4-(4-Hydroxy-2,2,6,6-tetramethyl-piperidin-1-yloxymethyl)-piperidine-1-carboxylic acid tert-butyl ester**

| Parameter              | Value           |
|------------------------|-----------------|
| Acquisition Time (sec) | 0.6226          |
| Frequency (MHz)        | 100.61          |
| Nucleus                | <sup>13</sup> C |
| Number of Transients   | 1024            |
| Original Points Count  | 32768           |
| Points Count           | 32768           |
| Pulse Sequence         | zgpg30          |
| Solvent                | CHLOROFORM-D    |
| Sweep Width (Hz)       | 26315.79        |
| Temperature (degree C) | 22.000          |

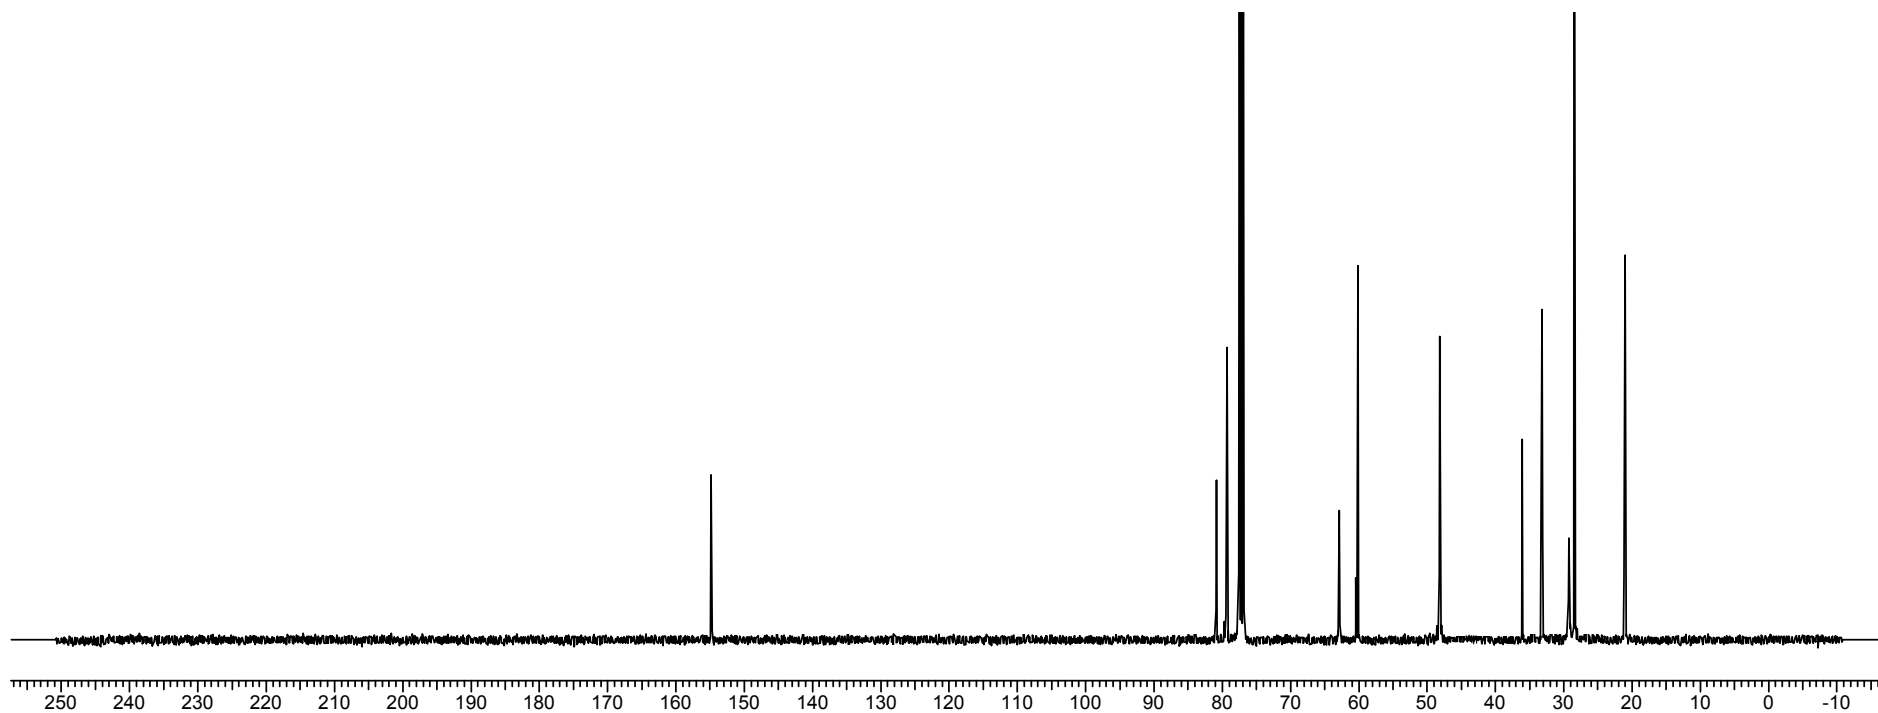

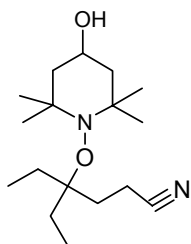**<sup>1</sup>H-NMR****S-23: 4-Ethyl-4-(4-hydroxy-2,2,6,6-tetramethyl-piperidin-1-yloxy)-hexanenitrile**

| Parameter              | Value          |
|------------------------|----------------|
| Acquisition Time (sec) | 2.6542         |
| Frequency (MHz)        | 300.13         |
| Nucleus                | <sup>1</sup> H |
| Number of Transients   | 16             |
| Original Points Count  | 32768          |
| Points Count           | 32768          |
| Pulse Sequence         | zg30           |
| Solvent                | CHLOROFORM-D   |
| Sweep Width (Hz)       | 6172.84        |
| Temperature (degree C) | 27.000         |

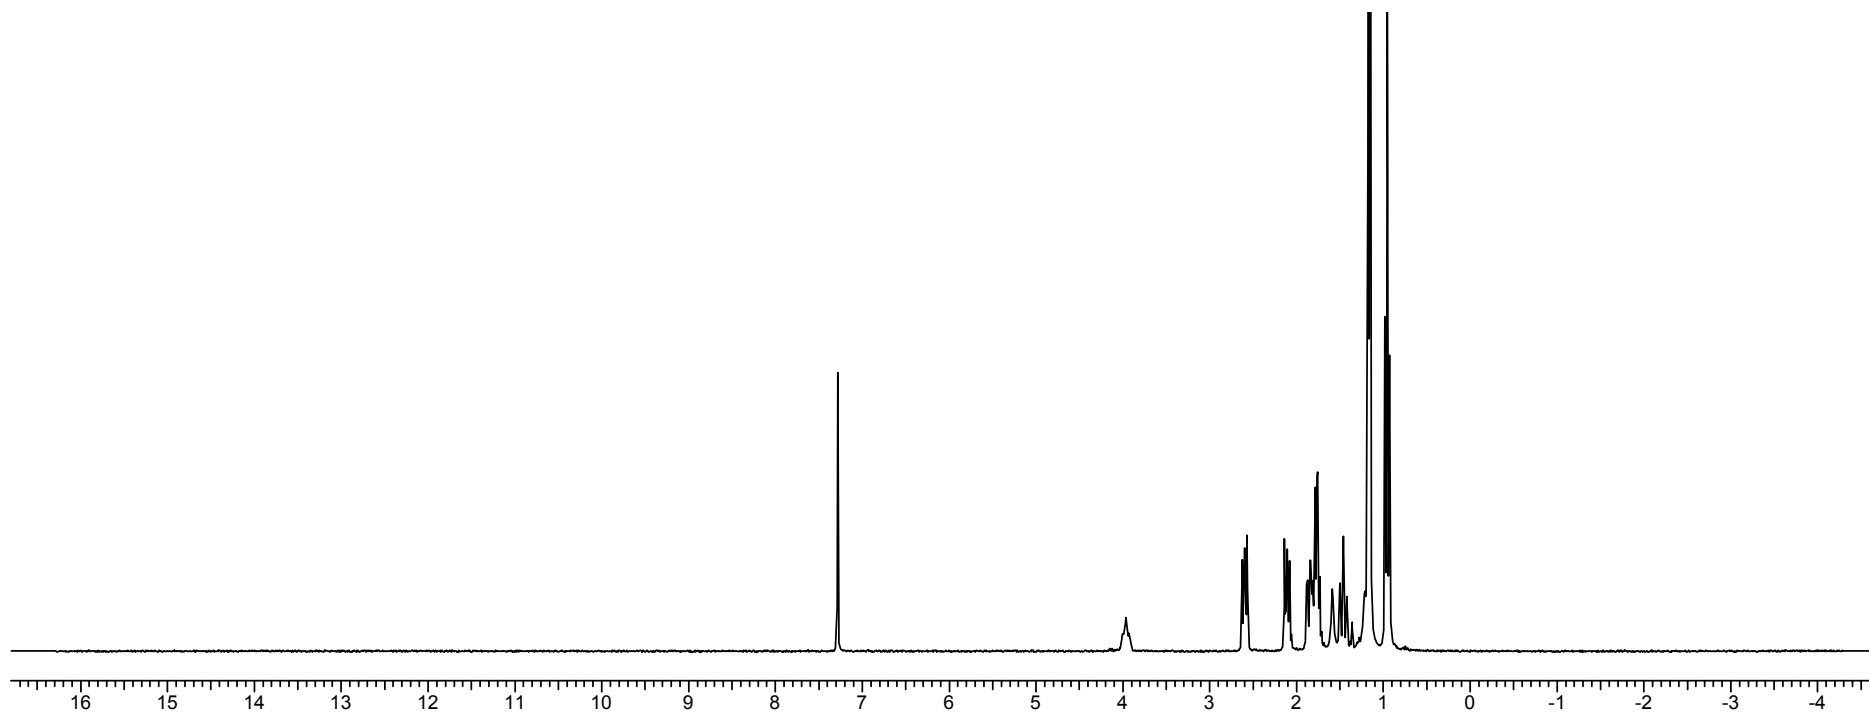

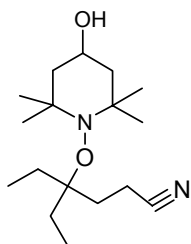<sup>13</sup>C-NMR

S-23: 4-Ethyl-4-(4-hydroxy-2,2,6,6-tetramethyl-piperidin-1-yloxy)-hexanenitrile

| Parameter              | Value           |
|------------------------|-----------------|
| Acquisition Time (sec) | 0.8307          |
| Frequency (MHz)        | 75.47           |
| Nucleus                | <sup>13</sup> C |
| Number of Transients   | 1024            |
| Original Points Count  | 32768           |
| Points Count           | 32768           |
| Pulse Sequence         | zgpg30          |
| Solvent                | CHLOROFORM-D    |
| Sweep Width (Hz)       | 19723.87        |
| Temperature (degree C) | 27.000          |

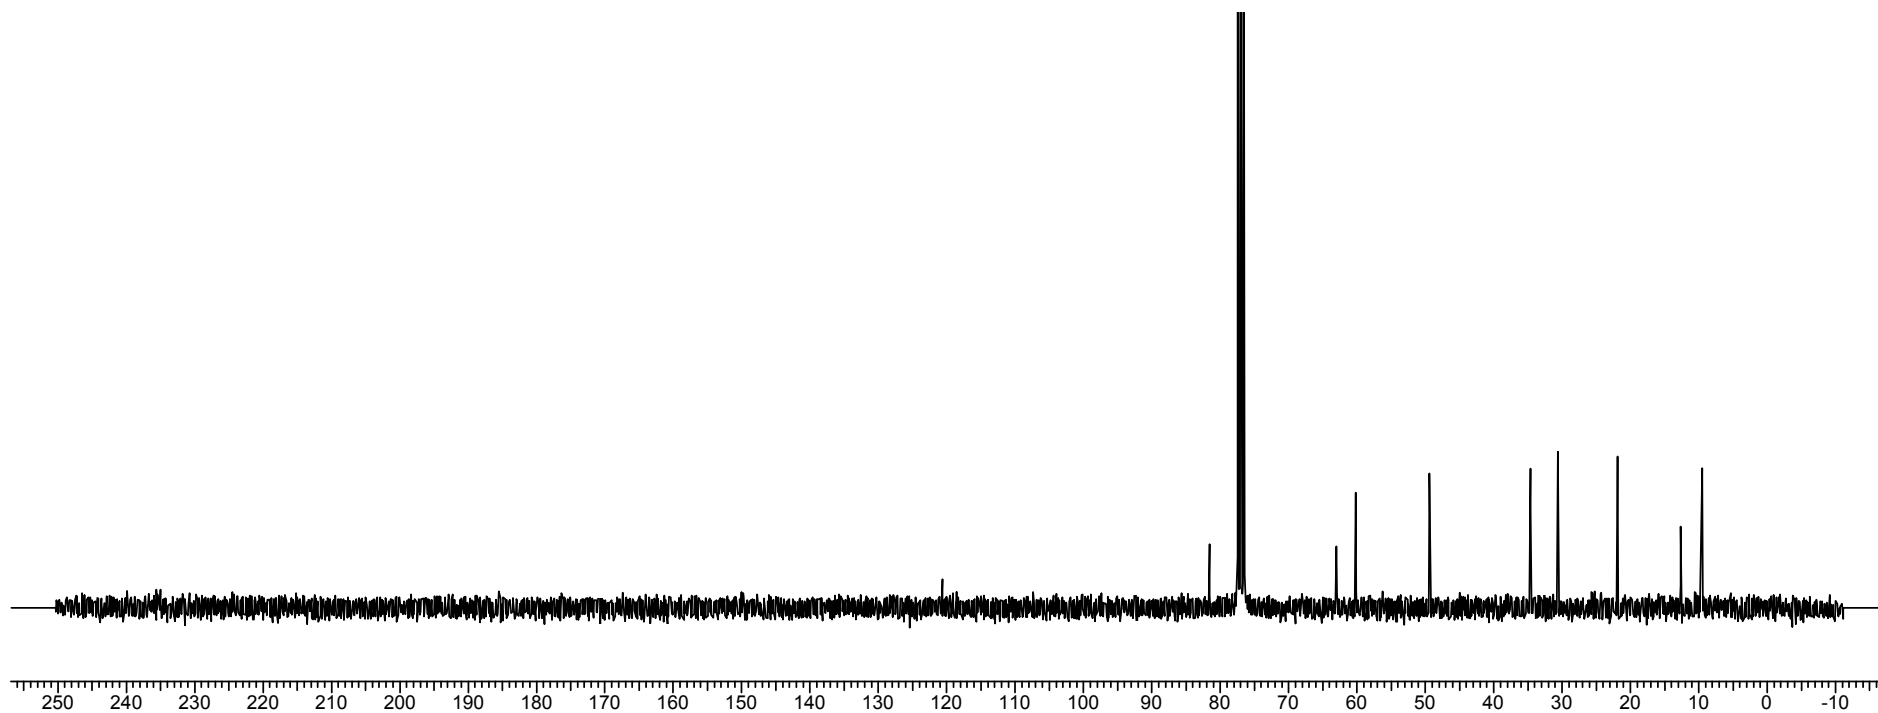

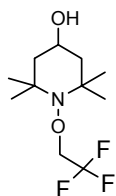**<sup>1</sup>H-NMR****S-24: 2,2,6,6-Tetramethyl-1-(2,2,2-trifluoro-ethoxy)-piperidin-4-ol**

| Parameter              | Value        |
|------------------------|--------------|
| Acquisition Time (sec) | 1.9923       |
| Frequency (MHz)        | 400.13       |
| Nucleus                | 1H           |
| Number of Transients   | 16           |
| Original Points Count  | 32768        |
| Points Count           | 32768        |
| Pulse Sequence         | zg30         |
| Solvent                | CHLOROFORM-D |
| Sweep Width (Hz)       | 8223.68      |
| Temperature (degree C) | 22.000       |

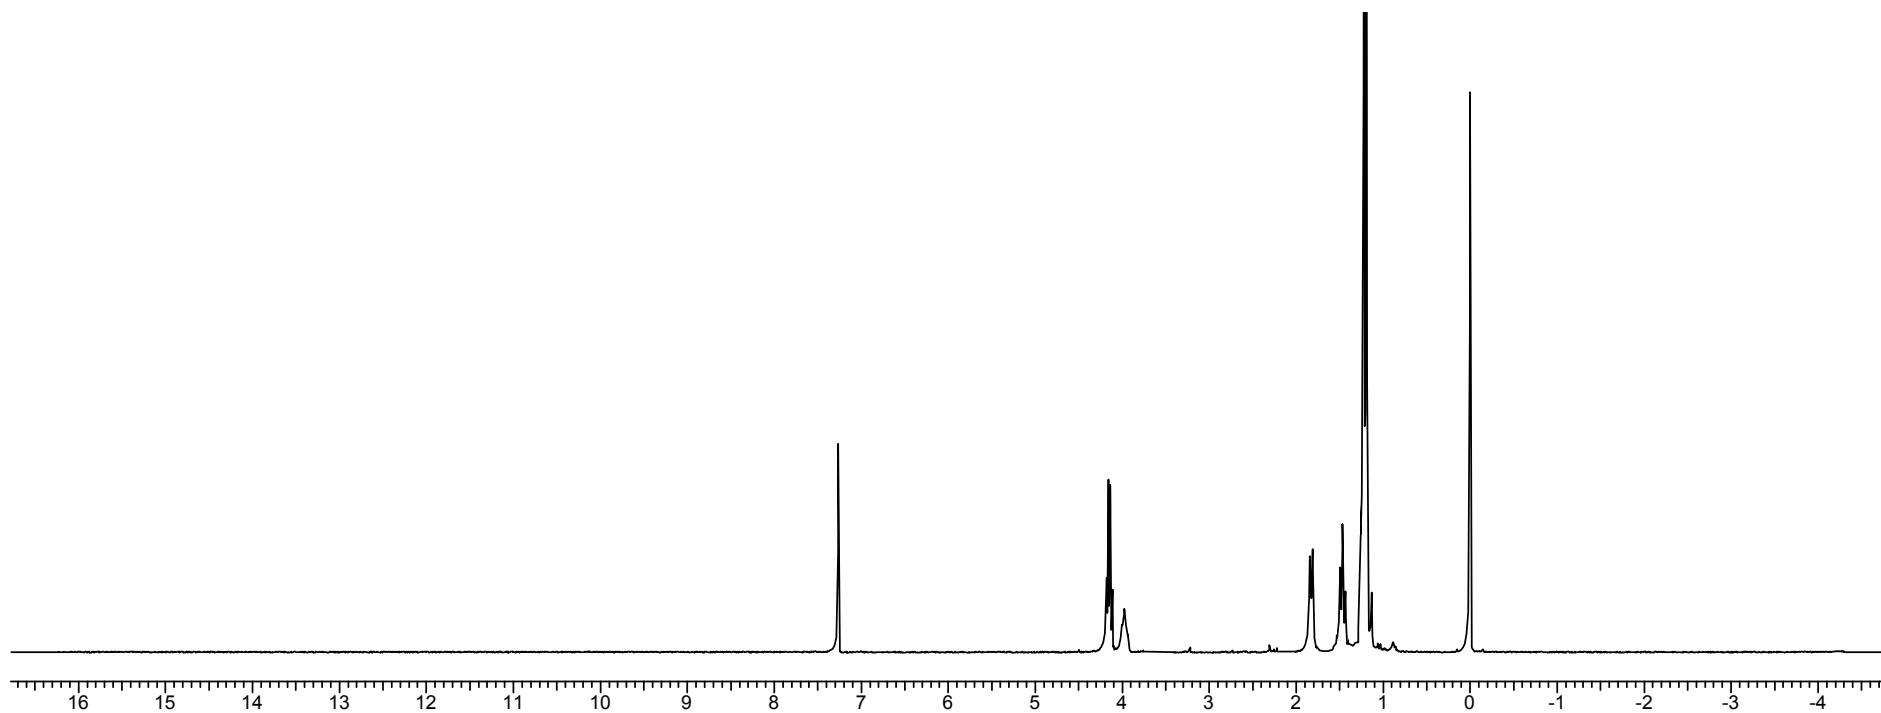

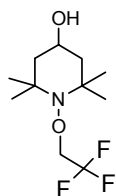**<sup>13</sup>C-NMR****S-24: 2,2,6,6-Tetramethyl-1-(2,2,2-trifluoro-ethoxy)-piperidin-4-ol**

| Parameter              | Value           |
|------------------------|-----------------|
| Acquisition Time (sec) | 0.6226          |
| Frequency (MHz)        | 100.61          |
| Nucleus                | <sup>13</sup> C |
| Number of Transients   | 256             |
| Original Points Count  | 32768           |
| Points Count           | 32768           |
| Pulse Sequence         | zgpg30          |
| Solvent                | CHLOROFORM-D    |
| Sweep Width (Hz)       | 26315.79        |
| Temperature (degree C) | 22.000          |

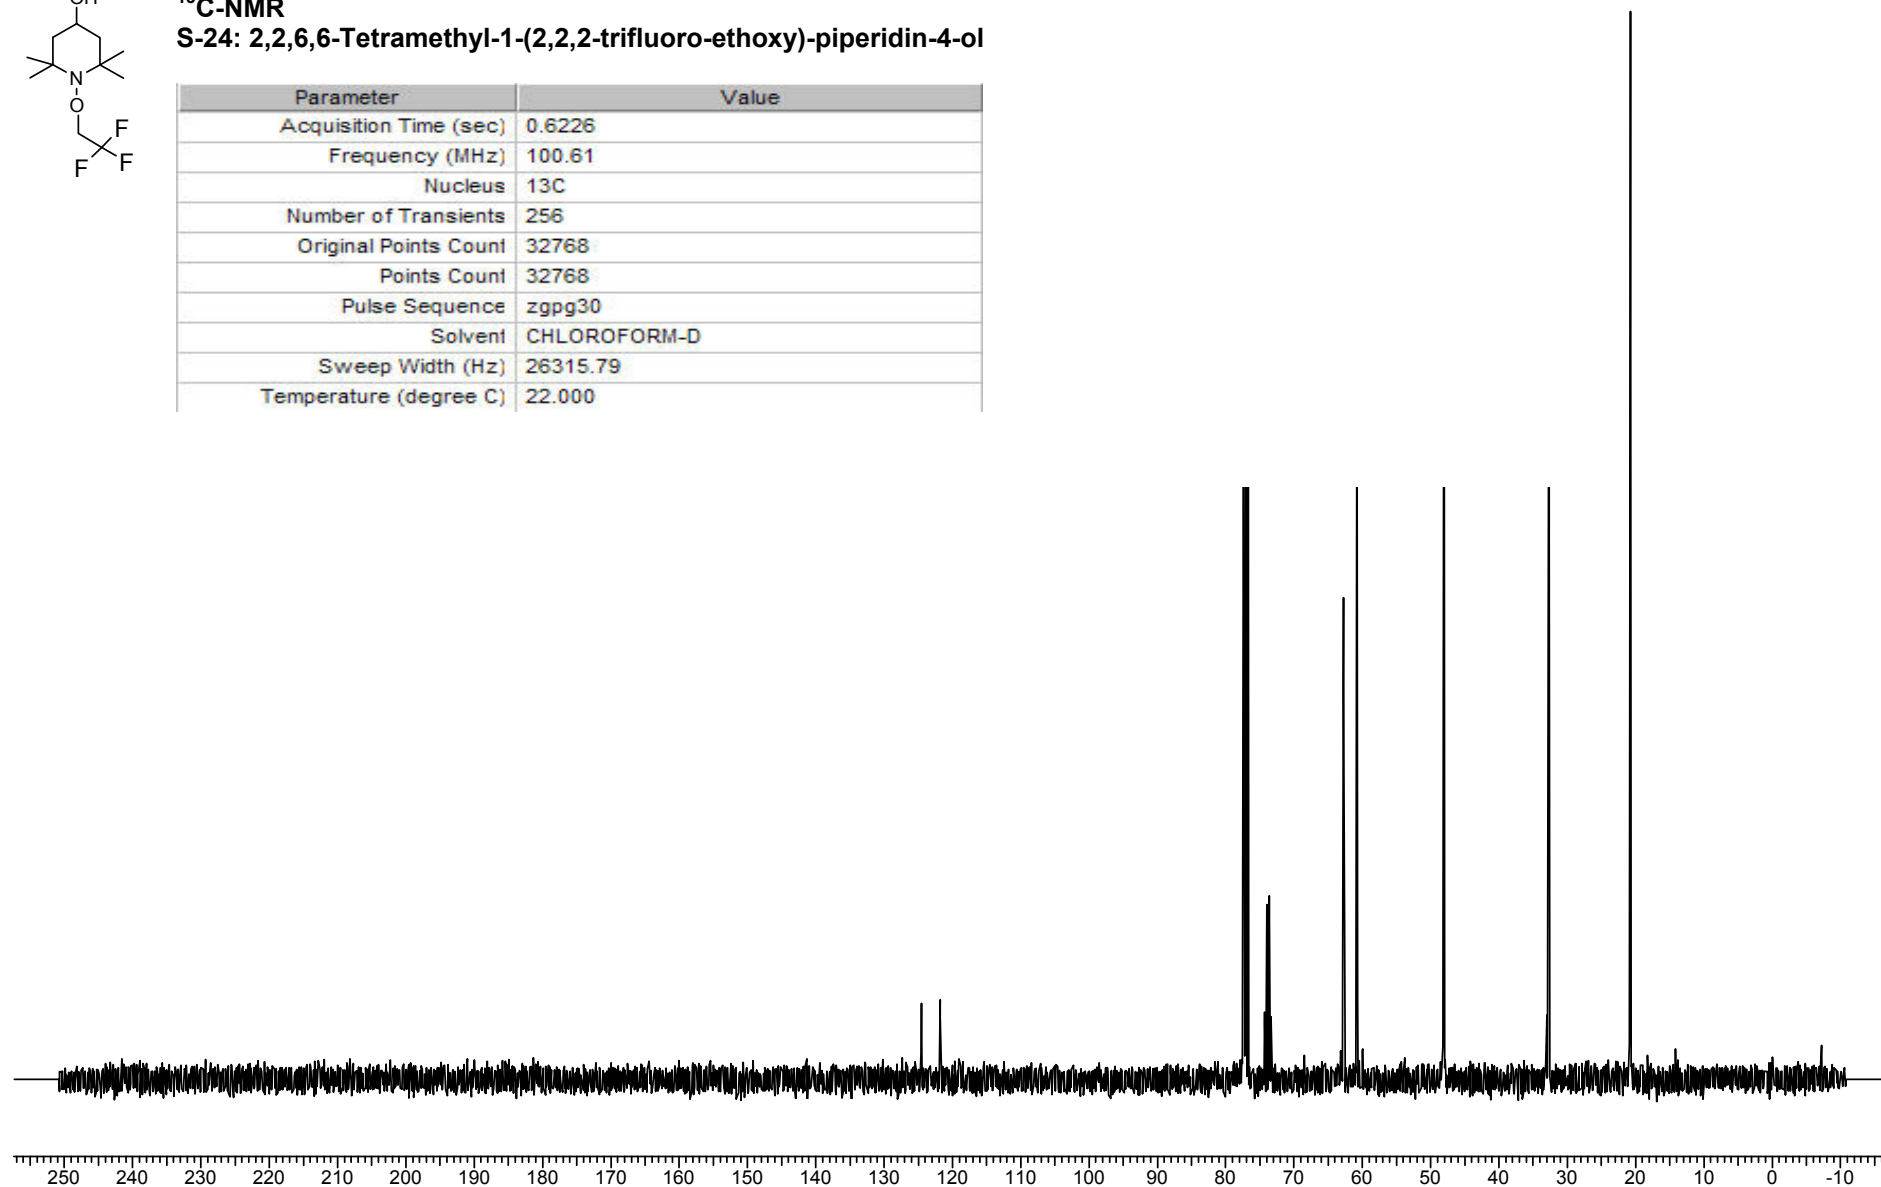

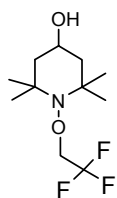**<sup>19</sup>F-NMR****S-24: 2,2,6,6-Tetramethyl-1-(2,2,2-trifluoroethoxy)-piperidin-4-ol**(Reference: CF<sub>3</sub>COOH: δ = -76 ppm)

| Parameter              | Value           |
|------------------------|-----------------|
| Acquisition Time (sec) | 0.4456          |
| Frequency (MHz)        | 282.40          |
| Nucleus                | <sup>19</sup> F |
| Number of Transients   | 32              |
| Original Points Count  | 65536           |
| Points Count           | 65536           |
| Pulse Sequence         | zgfhigqn        |
| Solvent                | CHLOROFORM-D    |
| Sweep Width (Hz)       | 73529.41        |
| Temperature (degree C) | 27.000          |

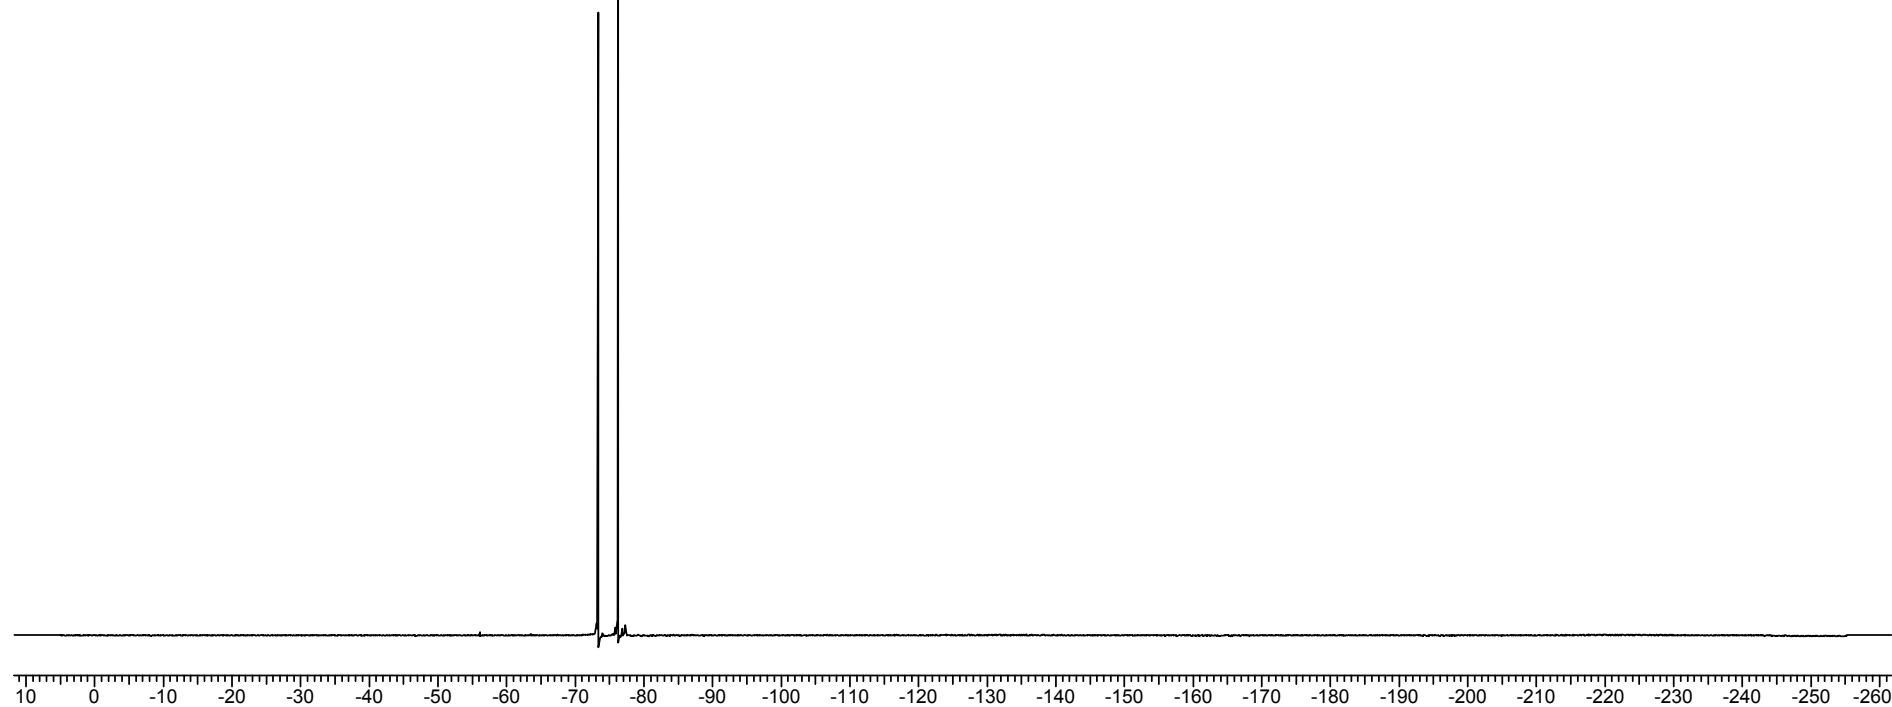

p70

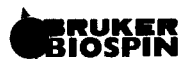

Current Data Parameters  
NAME 20051014-3-24  
EXPNO 1  
PROCNO 1

F2 - Acquisition Parameters  
Date\_ 20051014  
Time 14.01  
INSTRUM dpx300  
PROBHD 5 mm QNP 1H/13  
PULPROG zg30  
TD 65536  
SOLVENT CDC13  
NS 16  
DS 2  
SWH 6172.839 Hz  
FIDRES 0.094190 Hz  
AQ 5.3084660 sec  
RG 203.2  
DW 81.000 usec  
DE 6.50 usec  
TE 0.0 K  
D1 1.00000000 sec  
MCREST 0.00000000 sec  
MCWRK 0.01500000 sec

===== CHANNEL f1 =====  
NUC1 1H  
P1 7.40 usec  
PL1 -6.00 dB  
SFO1 300.1318008 MHz

F2 - Processing parameters  
SI 32768  
SF 300.1300000 MHz  
WDW EM  
SSB 0  
LB 0.30 Hz  
GB 0  
PC 1.00

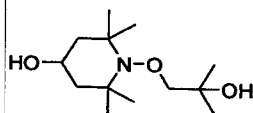

S-25

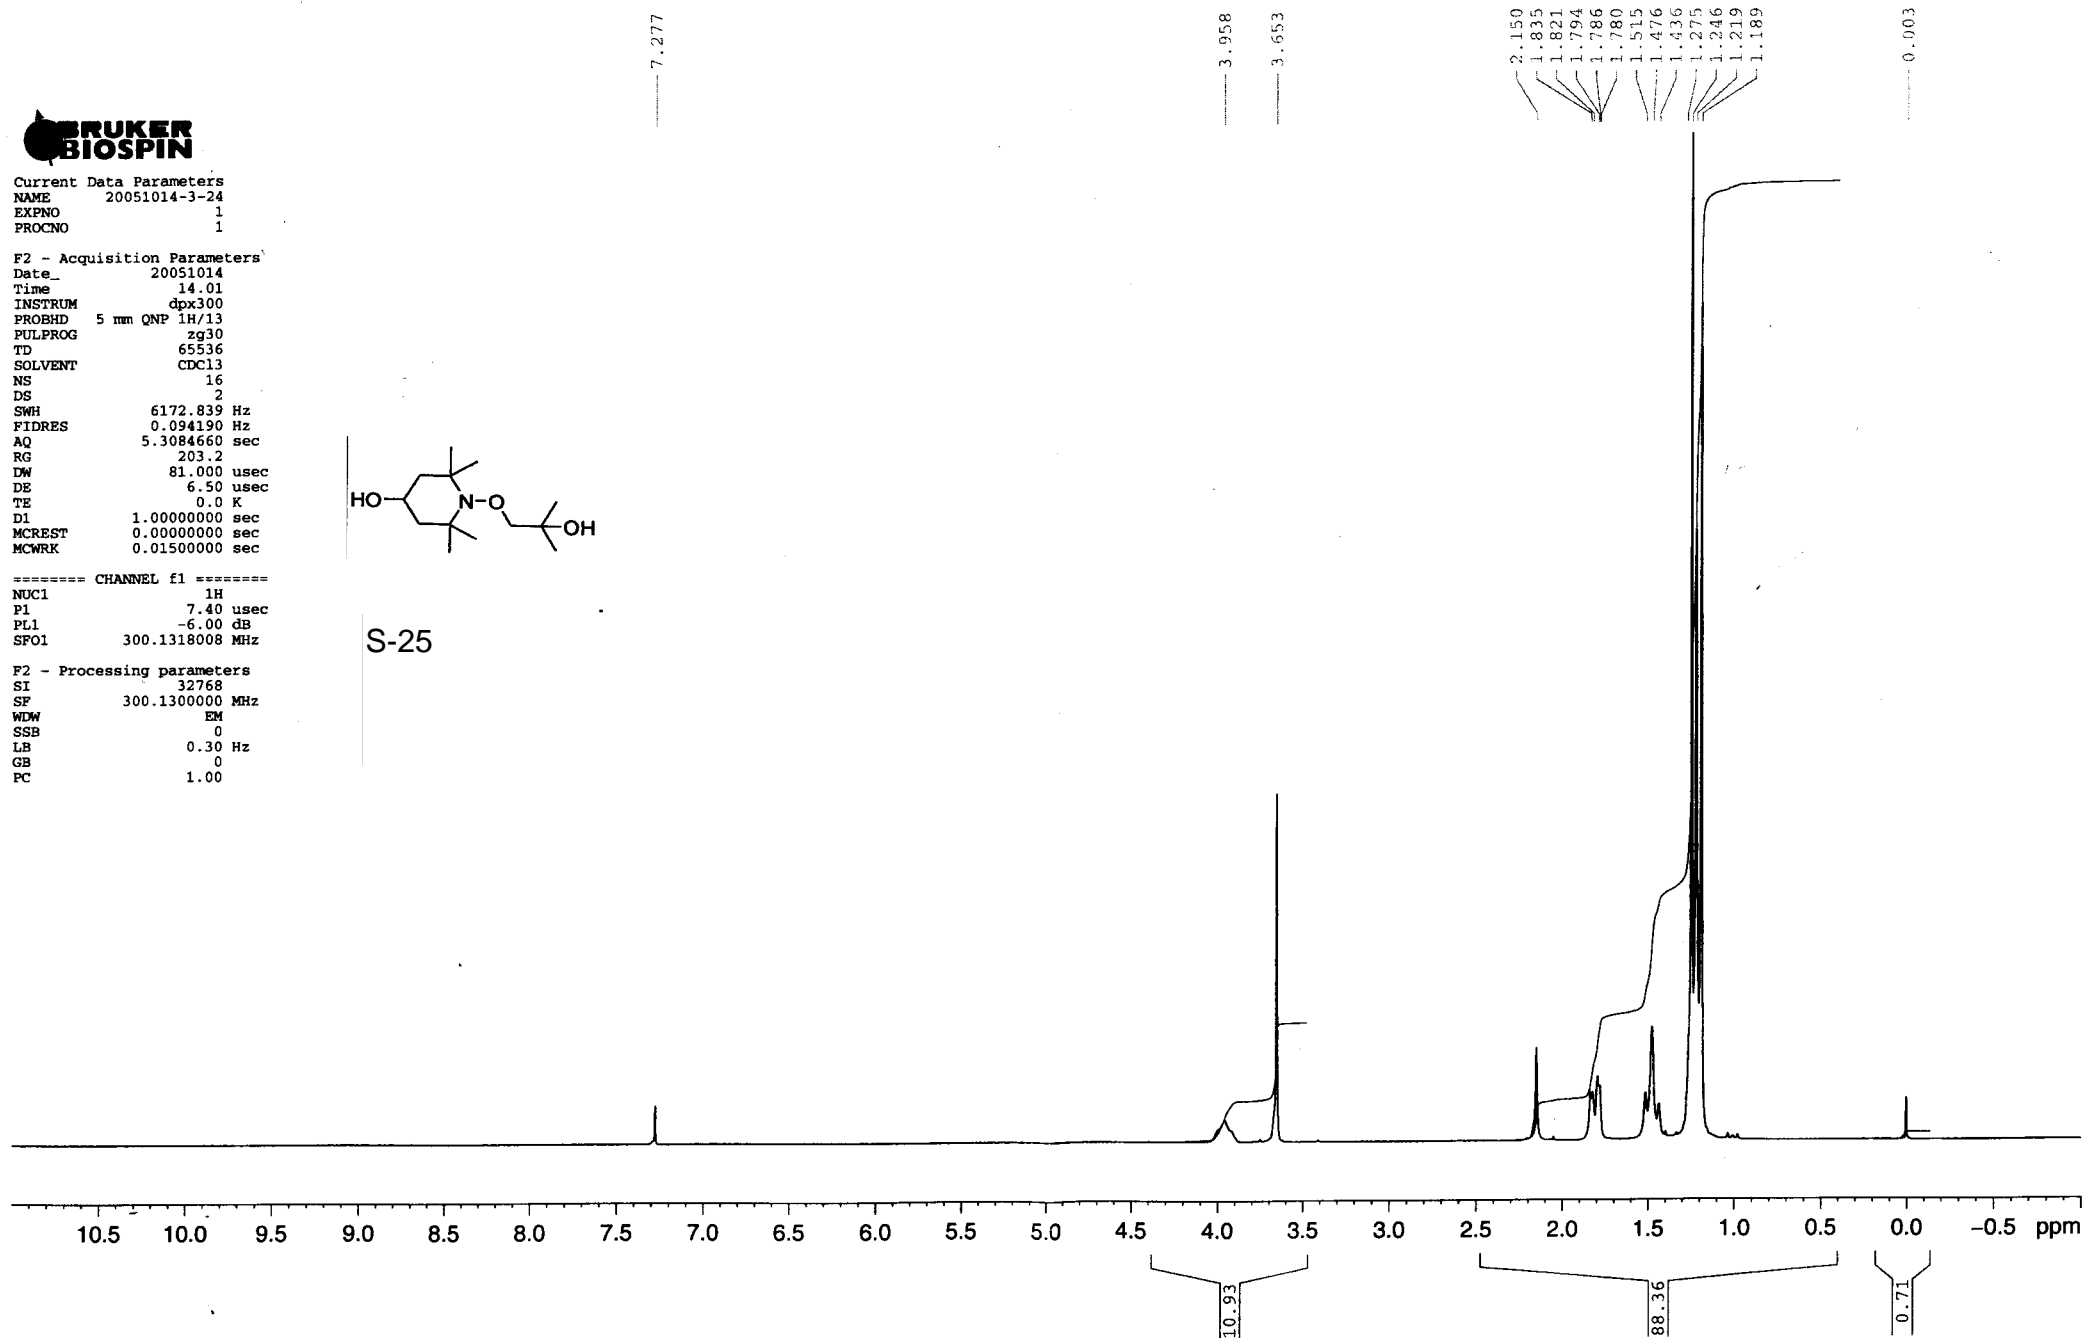

p71

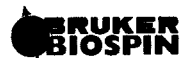

Current Data Parameters  
NAME 20051017-4-21  
EXPNO 2  
PROCNO 1

F2 - Acquisition Parameters  
Date\_ 20051017  
Time 8.34  
INSTRUM dpx400  
PROBHD 5 mm QNP 1H/15  
PULPROG zgpg30  
TD 65536  
SOLVENT CDC13  
NS 256  
DS 4  
SWH 26315.789 Hz  
FIDRES 0.401547 Hz  
AQ 1.2452340 sec  
RG 5160.6  
DW 19.000 usec  
DE 10.00 usec  
TE 297.0 K  
D1 2.00000000 sec  
d11 0.03000000 sec  
MCREST 0.00000000 sec  
MCWRK 0.01500000 sec

===== CHANNEL f1 =====  
NUC1 13C  
P1 6.10 usec  
PL1 -2.00 dB  
SFO1 100.6248421 MHz

===== CHANNEL f2 =====  
CPDPRG2 waltz16  
NUC2 1H  
PCPD2 80.00 usec  
PL2 -2.00 dB  
PL12 20.00 dB  
PL13 23.00 dB  
SFO2 400.1316005 MHz

F2 - Processing parameters  
SI 32768  
SF 100.6127690 MHz  
WDW EM  
SSB 0  
LB 1.00 Hz  
GB 0  
PC 1.40

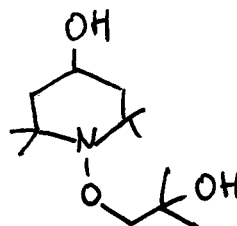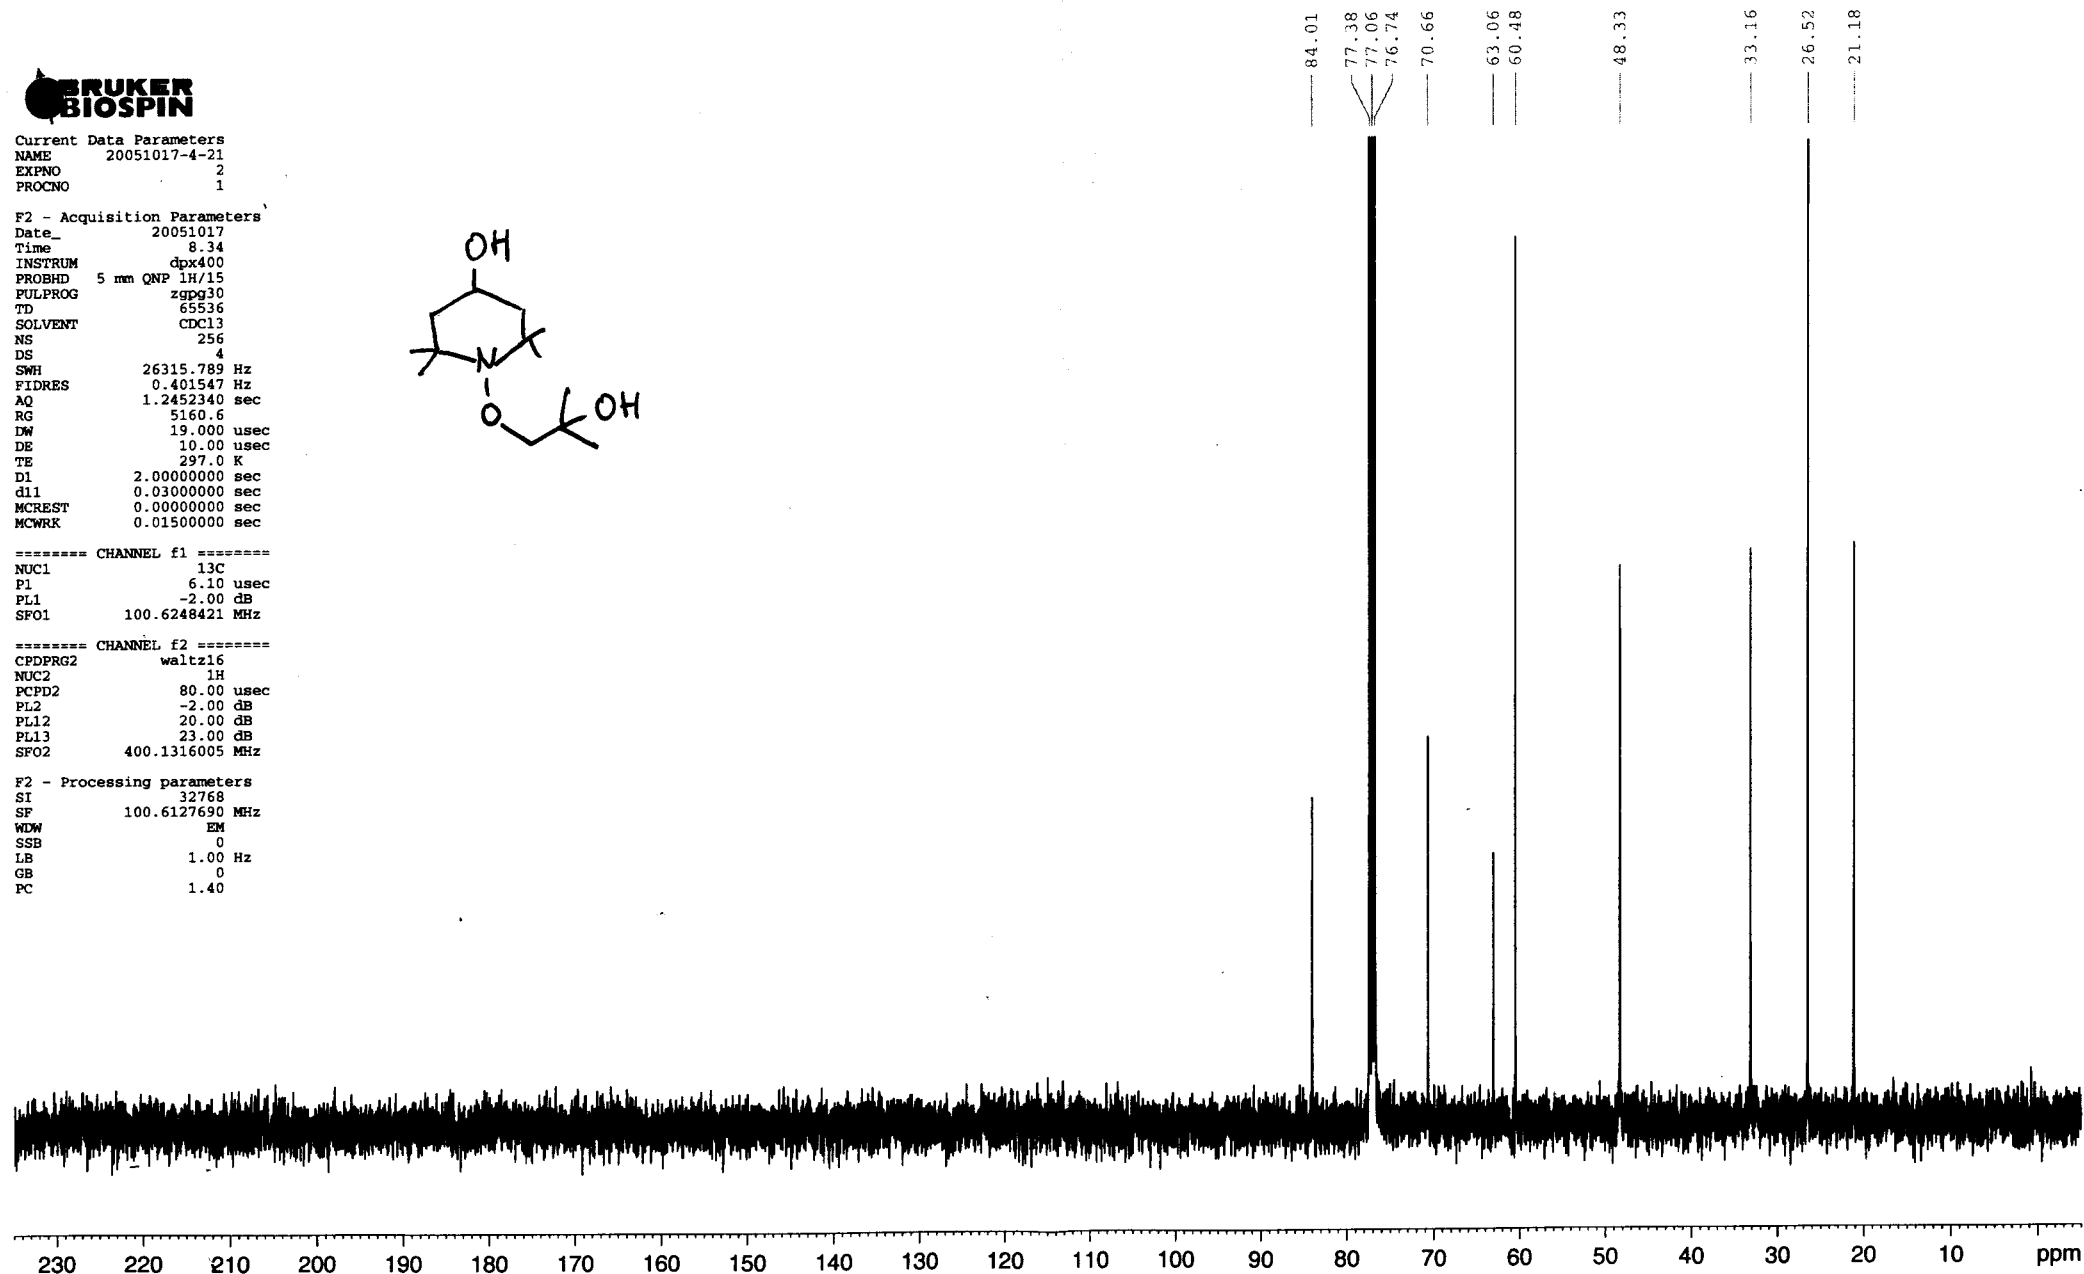

BRUKER dpx 300

Current Data Parameters  
NAME 20080807-300-21  
EXPNO 1  
PROCNO 1

F2 - Acquisition Parameters  
Date\_ 20080807  
Time 17.04  
INSTRUM spect  
PROBHD 5 mm QNP 1H/13  
PULPROG zg30  
TD 65536  
SOLVENT MeOD  
NS 16  
DS 2  
SWH 6172.839 Hz  
FIDRES 0.094190 Hz  
AQ 5.3084660 sec  
RG 228.1  
DW 81.000 usec  
DE 6.50 usec  
TE 300.0 K  
D1 1.0000000 sec  
TD0 1

===== CHANNEL f1 =====  
NUC1 1H  
P1 8.30 usec  
PL1 -6.00 dB  
SFO1 300.1318008 MHz

F2 - Processing parameters  
SI 32768  
SF 300.1300000 MHz  
WDW EM  
SSB 0  
LB 0.30 Hz  
GB 0  
PC 1.00

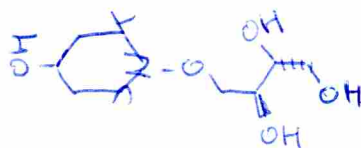

S-26

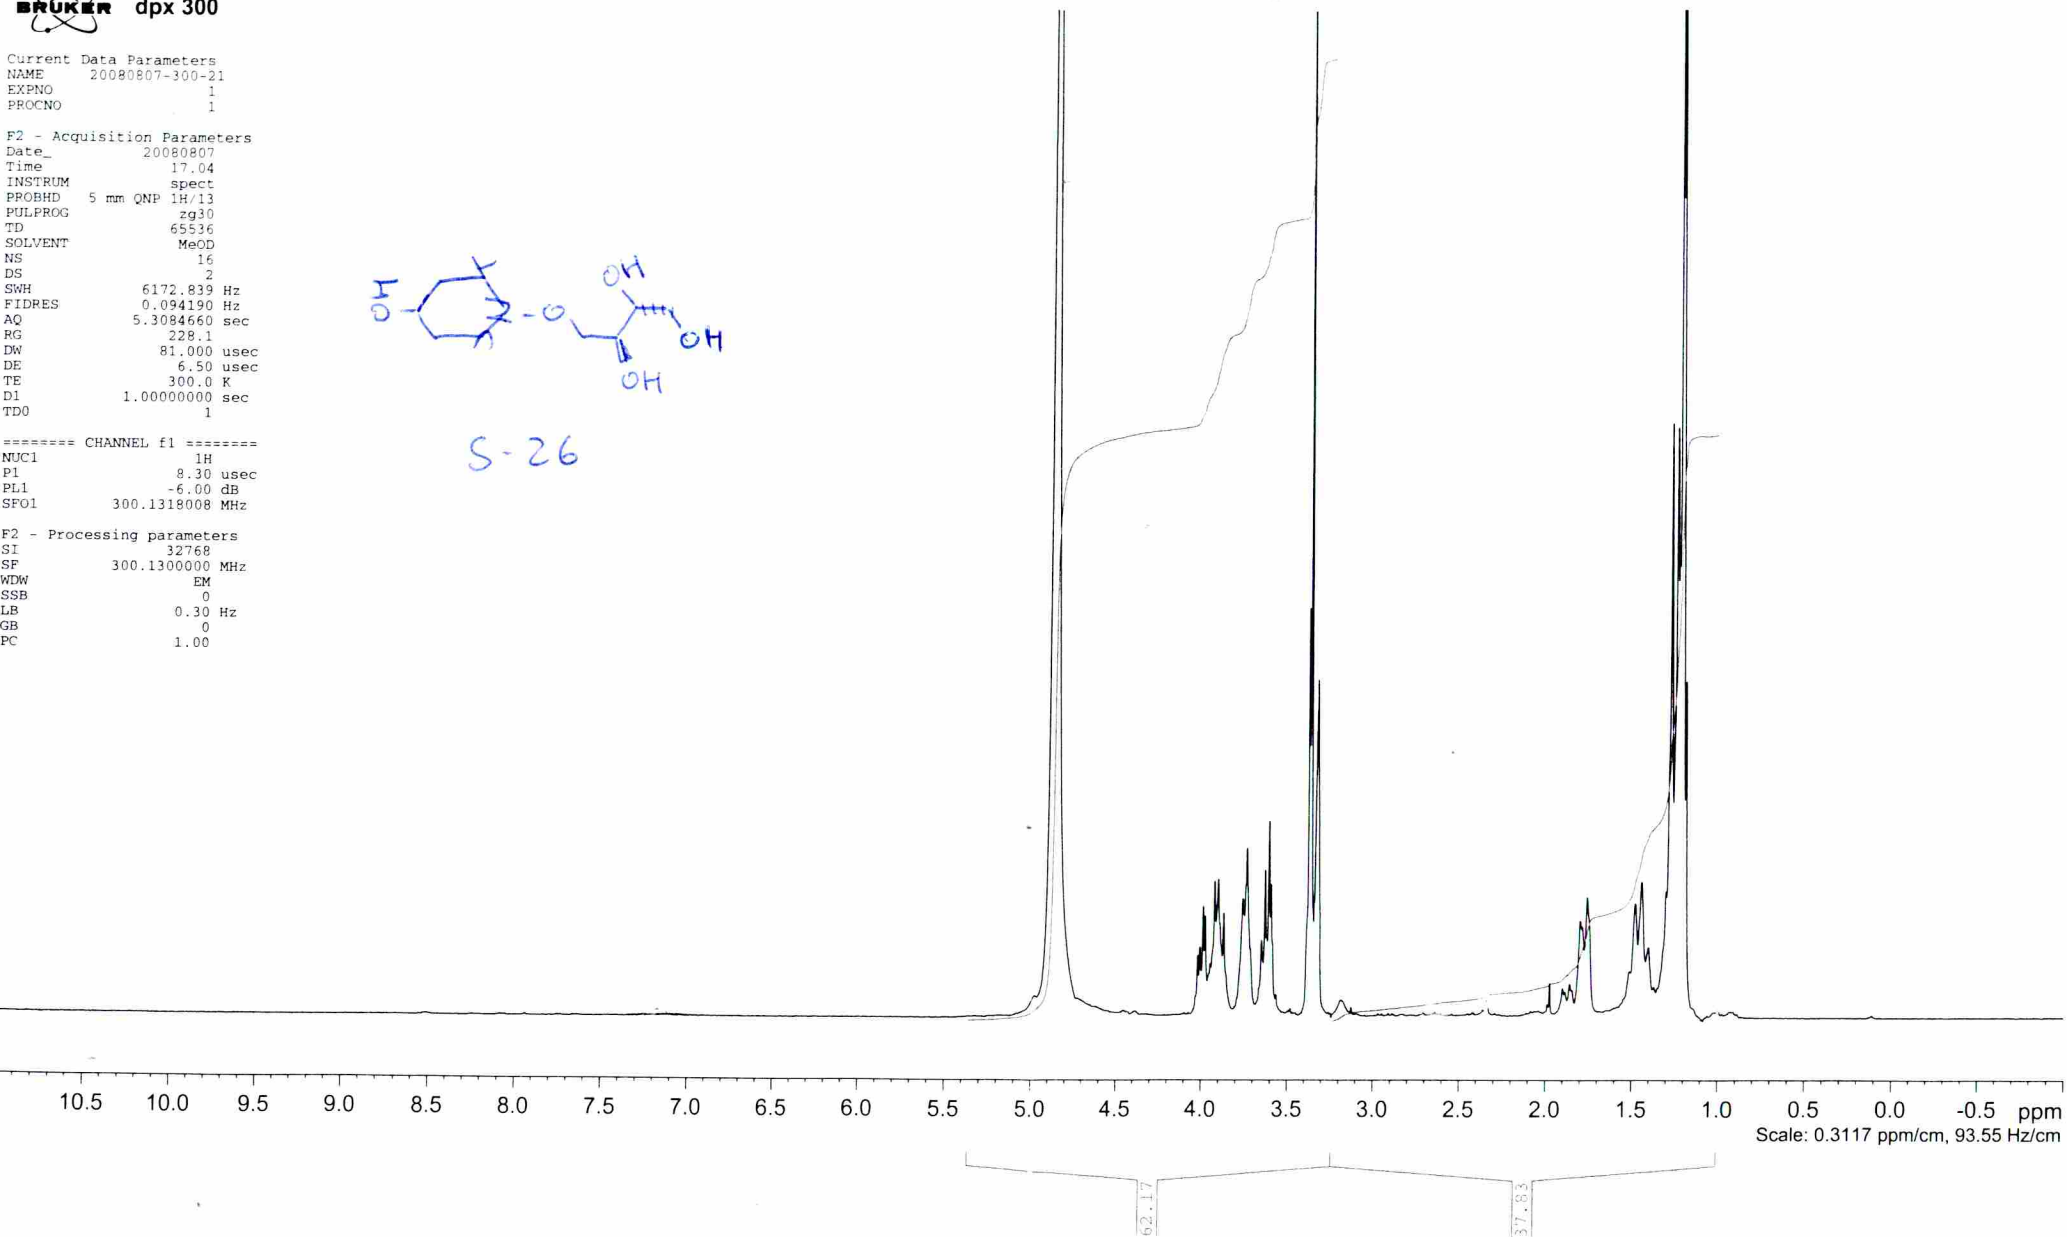

AD\_C13PD4k MeOD I

Current Data Parameters  
NAME 20080807-300-15  
EXPNO 1  
PROCNO 1

F2 - Acquisition Parameters  
Date\_ 20080807  
Time 23.18  
INSTRUM spect  
PROBHD 5 mm QNP 1H/13  
PULPROG zgpg30  
TD 65536  
SOLVENT MeOD  
NS 4096  
DS 4  
SWH 19723.865 Hz  
FIDRES 0.300962 Hz  
AQ 1.6613876 sec  
RG 512  
DW 25.350 usec  
DE 6.50 usec  
TE 300.0 K  
D1 2.00000000 sec  
d11 0.03000000 sec  
DELTA 1.89999998 sec  
TD0 1

===== CHANNEL f1 =====  
NUC1 13C  
P1 11.90 usec  
PL1 -6.00 dB  
SFO1 75.4767751 MHz

===== CHANNEL f2 =====  
CPDPRG2 waltz16  
NUC2 1H  
PCPD2 100.00 usec  
PL2 -6.00 dB  
PL12 17.50 dB  
PL13 20.50 dB  
SFO2 300.1312005 MHz

F2 - Processing parameters  
SI 32768  
SF 75.4676418 MHz  
WDW EM  
SSB 0  
LB 1.00 Hz  
GB 0  
PC 1.40

S-26

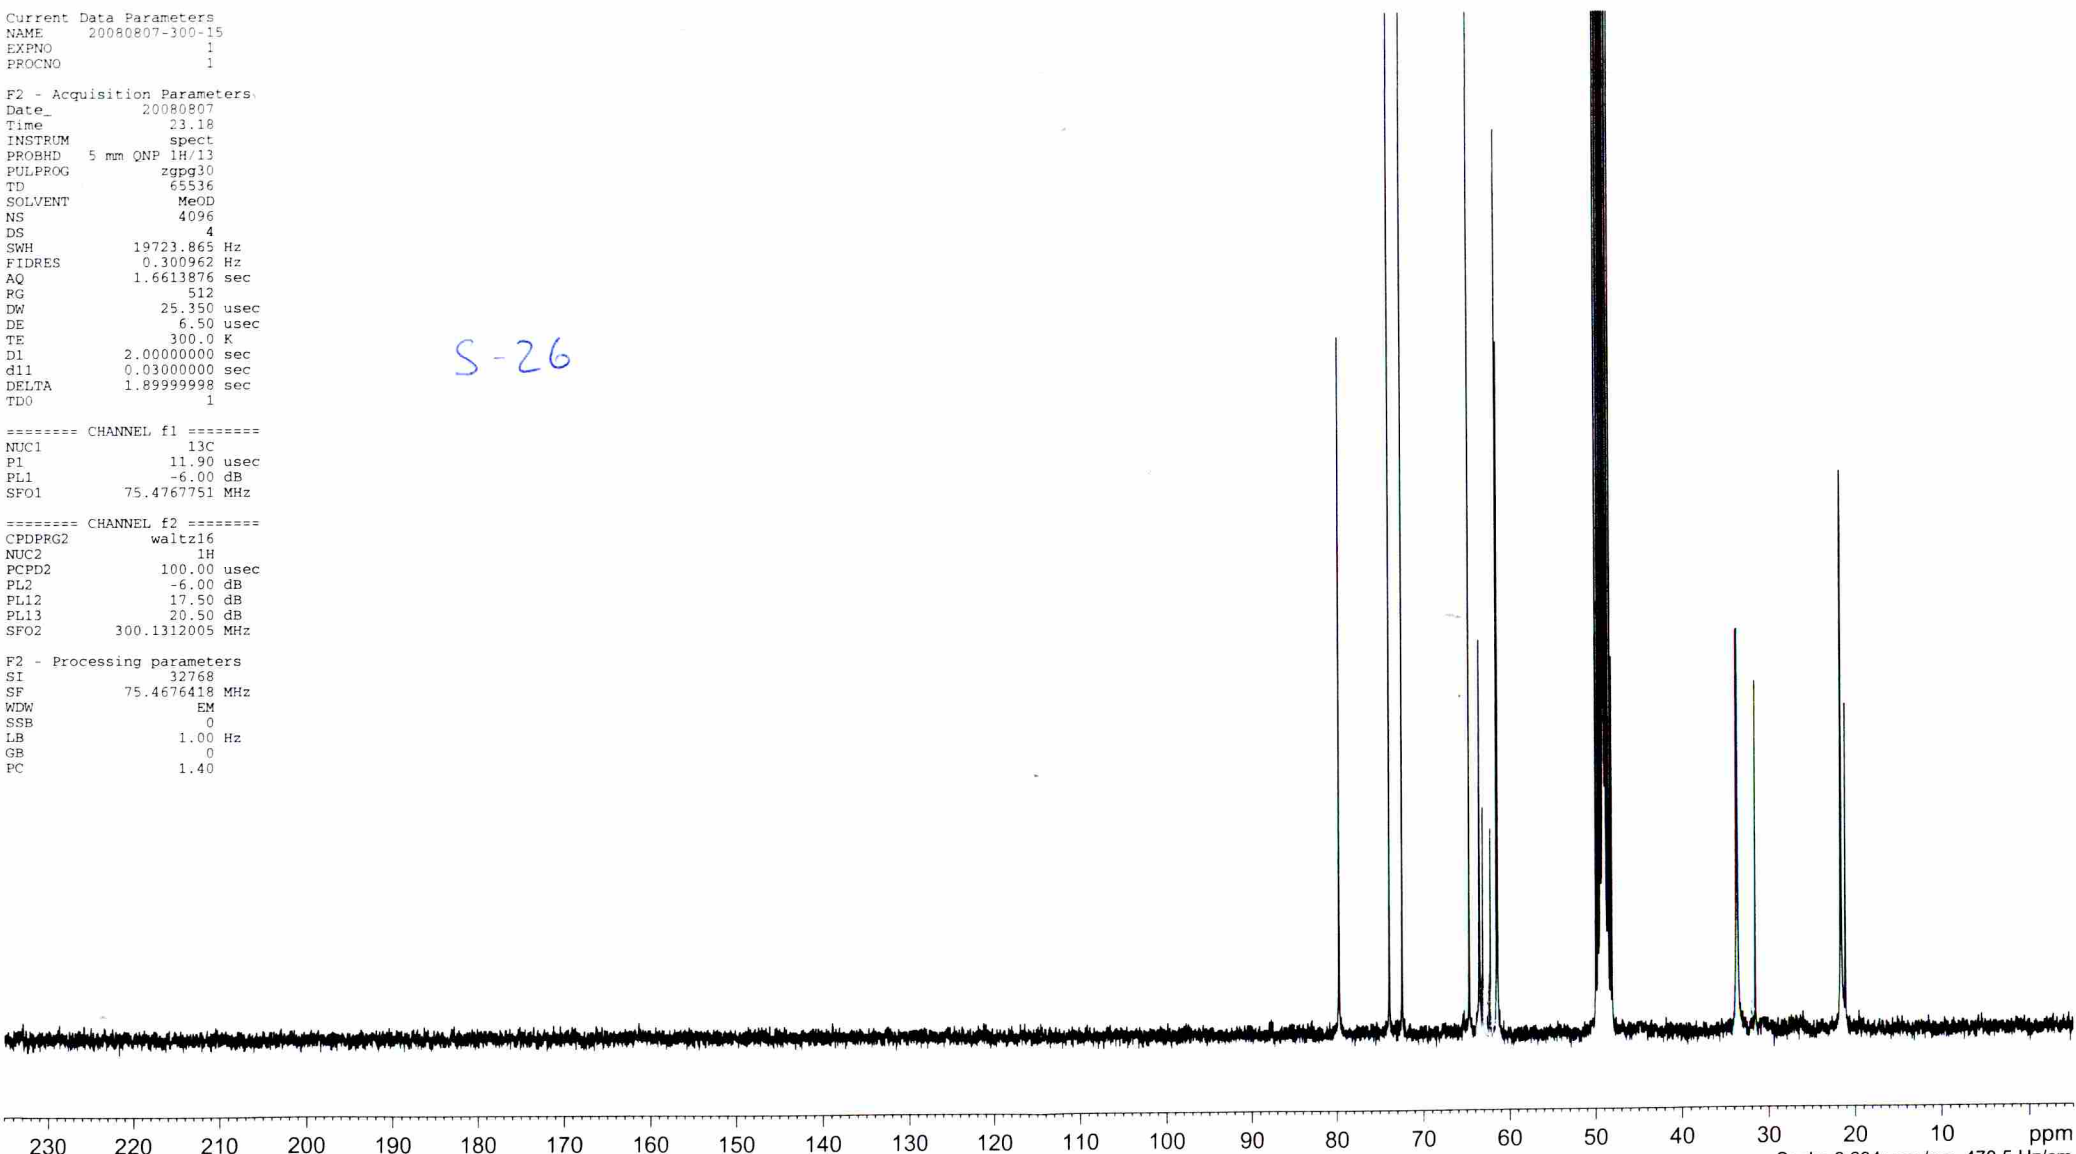

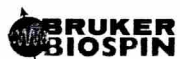

Current Data Parameters  
NAME 20050826-3-11  
EXPNO 1  
PROCNO 1

F2 - Acquisition Parameters  
Date\_ 20050826  
Time 10.29  
INSTRUM dpx300  
PROBHD 5 mm QNP 1H/13  
PULPROG zg30  
TD 65536  
SOLVENT DMSO  
NS 16  
DS 2  
SWH 6172.839 Hz  
FIDRES 0.094190 Hz  
AQ 5.3084660 sec  
RG 287.4  
DW 81.000 usec  
DE 6.50 usec  
TE 0.0 K  
D1 1.00000000 sec  
MCREST 0.00000000 sec  
MCWRK 0.01500000 sec

===== CHANNEL f1 =====  
NUC1 1H  
P1 7.40 usec  
PL1 -6.00 dB  
SFO1 300.1318008 MHz

F2 - Processing parameters  
SI 32768  
SF 300.1300000 MHz  
WDW EM  
SSB 0  
LB 0.30 Hz  
GB 0  
PC 1.00

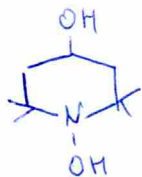

S-27

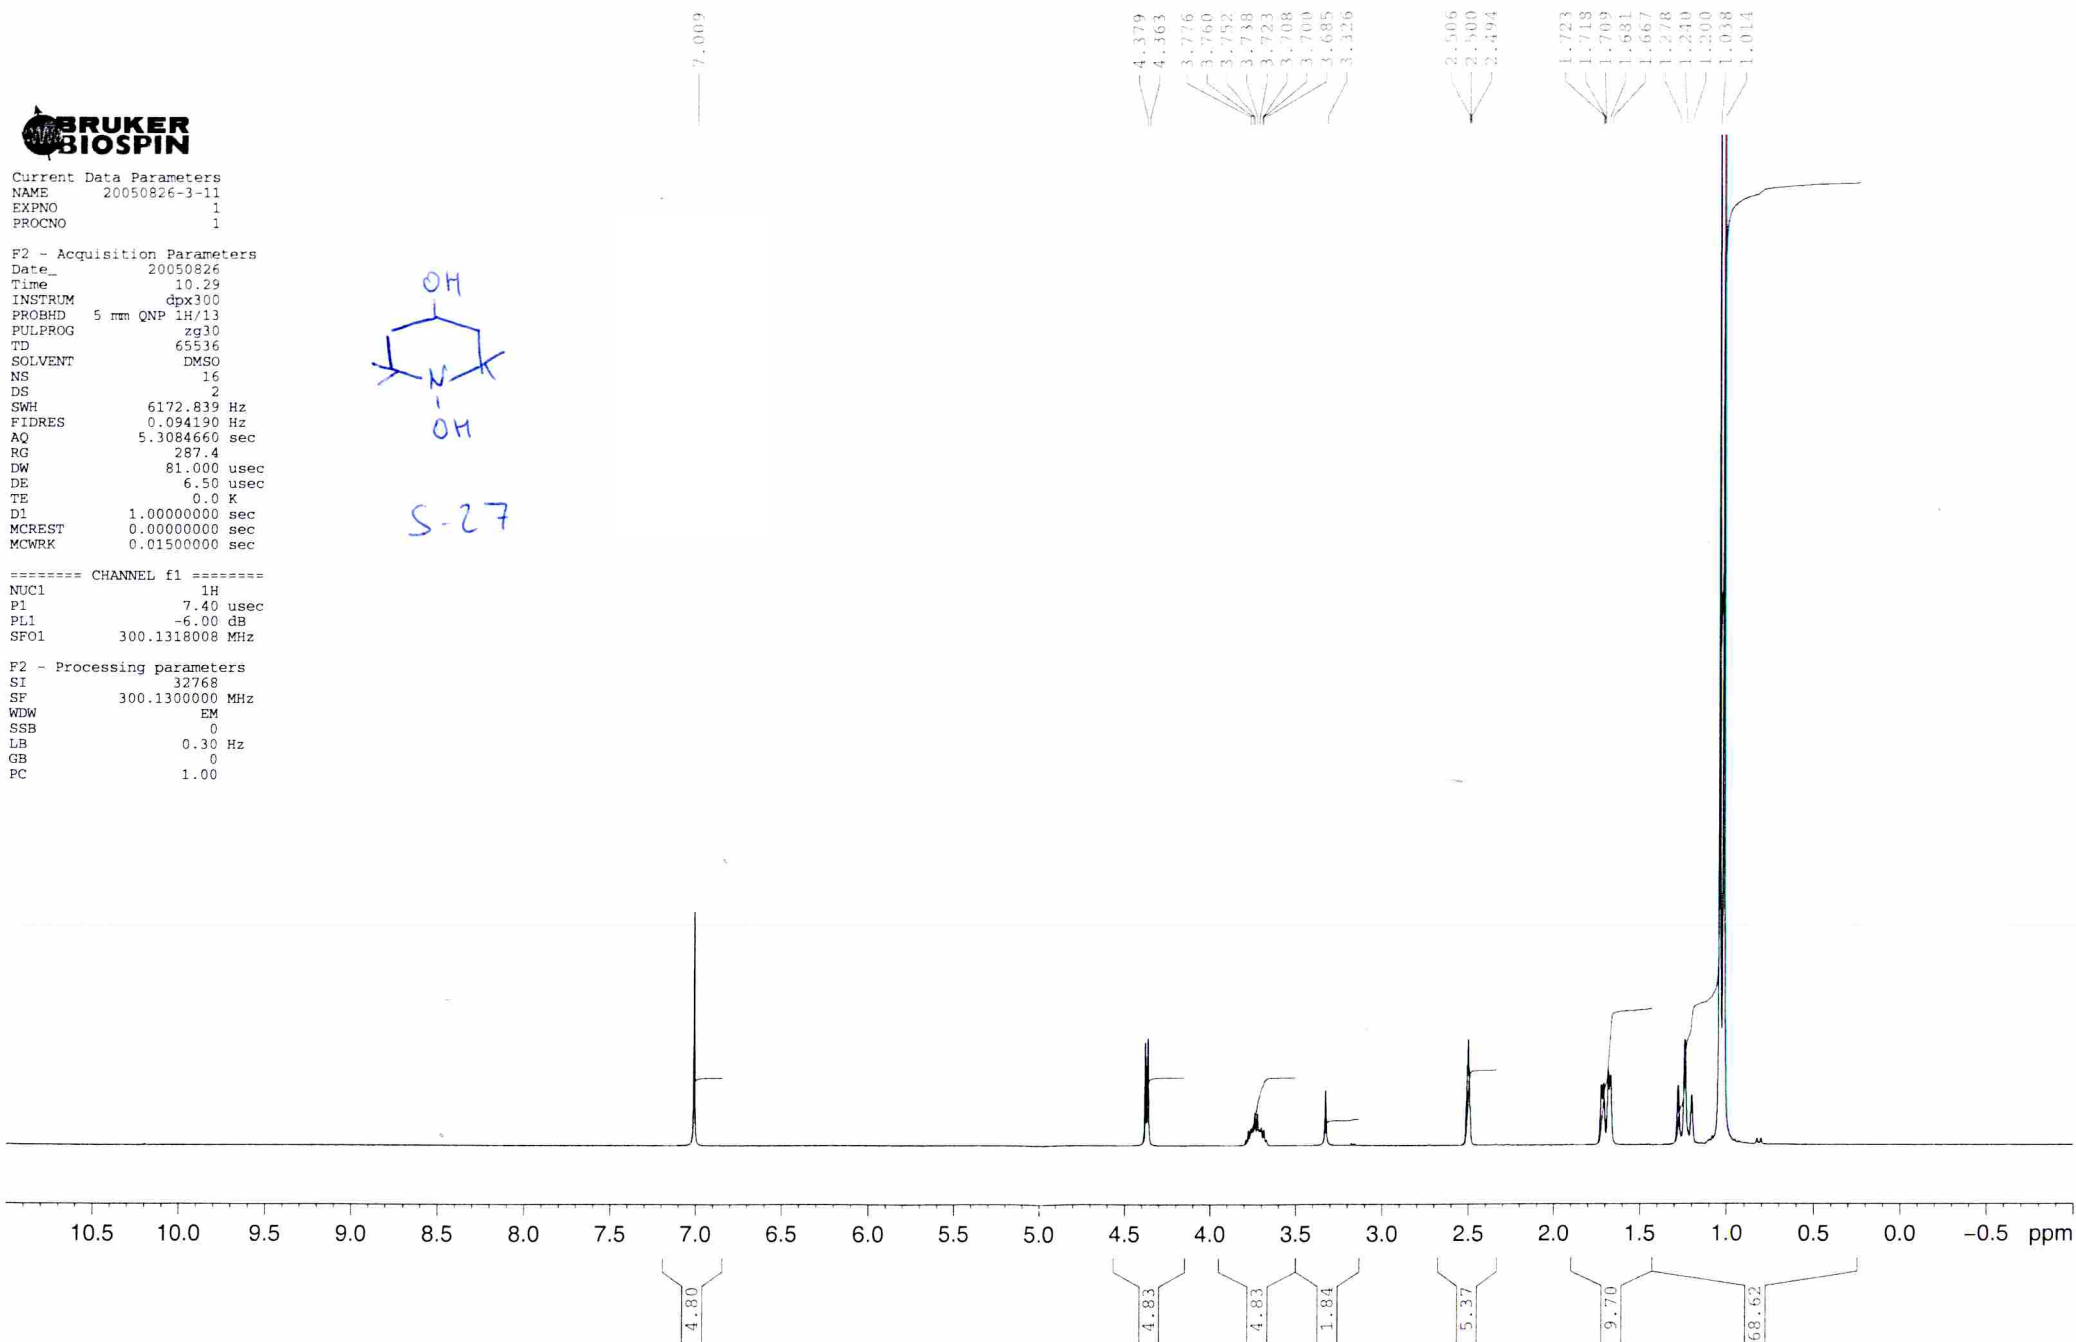

p75

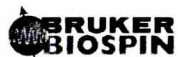

Current Data Parameters  
NAME 20050826-3-11  
EXPNO 2  
PROCNO 1

F2 - Acquisition Parameters  
Date\_ 20050826  
Time 10.46  
INSTRUM dpx300  
PROBHD 5 mm QNP 1H/13  
PULPROG zgpg30  
TD 65536  
SOLVENT DMSO  
NS 256  
DS 4  
SWH 19723.865 Hz  
FIDRES 0.300962 Hz  
AQ 1.6613876 sec  
RG 1149.4  
DW 25.350 usec  
DE 6.50 usec  
TE 0.0 K  
D1 2.00000000 sec  
d11 0.03000000 sec  
MCREST 0.00000000 sec  
MCWRK 0.01500000 sec

===== CHANNEL f1 =====  
NUC1 13C  
P1 5.00 usec  
PL1 -6.00 dB  
SFO1 75.4767751 MHz

===== CHANNEL f2 =====  
CPDPRG2 waltz16  
NUC2 1H  
PCPD2 80.00 usec  
PL2 -6.00 dB  
PL12 16.70 dB  
PL13 19.70 dB  
SFO2 300.1312005 MHz

F2 - Processing parameters  
SI 32768  
SF 75.4677190 MHz  
WDW EM  
SSB 0  
LB 1.00 Hz  
GB 0  
PC 1.40

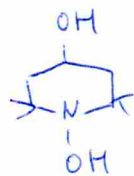

S-27

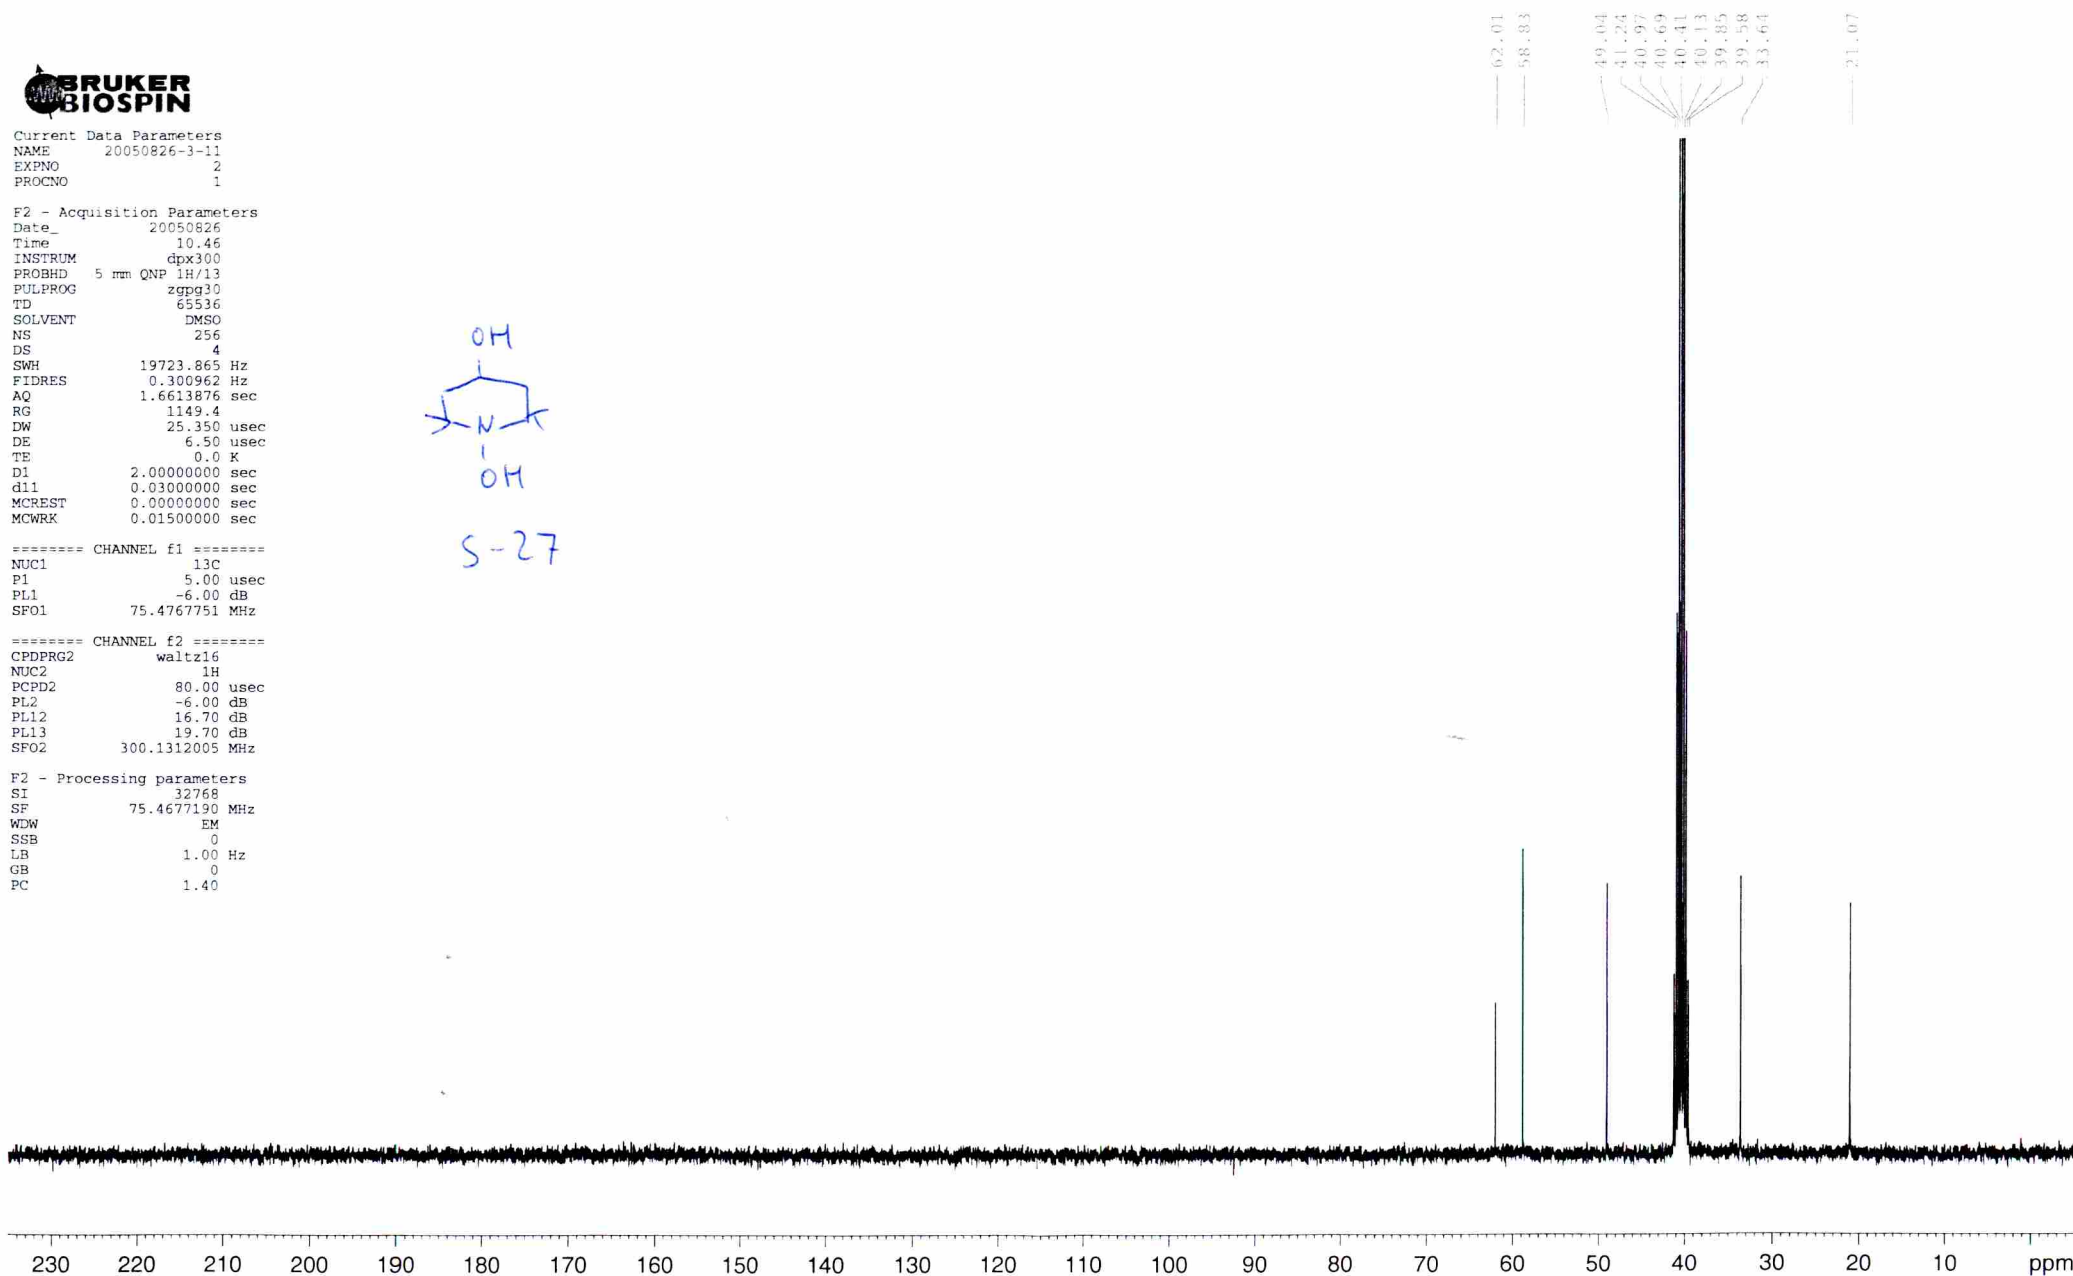

Supplement: Supplementary file 1 [file 4574845]
